# Supplementary material for: A novel chiral surfactant-type metallomicellar catalyst for asymmetric Michael addition in water
Source: Royal Society of Chemistry journal article supplement (doi:10.1039/d0cc04410e), 2020-01-01
Supplement: d0cc04410e1.pdf [file d0cc04410e1.pdf]

## Supporting Information

### A Novel Chiral Surfactant-Type Metallomicellar Catalyst for Asymmetric Michael Addition in Water

Xinping Liang<sup>a</sup>, Yang Gui<sup>a</sup>, Kuiliang Li<sup>a</sup>, Jindong Li<sup>a</sup>, Zhenggen Zha<sup>a</sup>, Lei Shi<sup>b\*</sup> and Zhiyong Wang<sup>a\*</sup>

<sup>[a]</sup>Hefei National Laboratory for Physical Sciences at Microscale, CAS Key Laboratory of Soft Matter Chemistry & Center for Excellence in Molecular Synthesis of Chinese Academy of Sciences, Collaborative Innovation Center of Suzhou Nano Science and Technology & School of Chemistry and Materials Science in University of Science and Technology of China, Hefei, Anhui 230026, P. R. China, Fax: (+86)551-63603185, E-mail: zwang3@ustc.edu.cn

<sup>[b]</sup>Hefei National Laboratory for Physical Sciences at the Microscale University of Science and Technology of China, Hefei, 230026, P. R. China. E-mail: leishi@ustc.edu.cn

### Table of Contents

|                                                                                                |      |
|------------------------------------------------------------------------------------------------|------|
| <b>1. General Information</b> .....                                                            | S-2  |
| <b>2. General procedure for the preparation of L</b> .....                                     | S-2  |
| <b>3. General procedure for the reaction</b> .....                                             | S-6  |
| <b>4. Mechanism study</b> .....                                                                | S-6  |
| <b>5. Experimental data of the reaction</b> .....                                              | S-11 |
| <b>6. Copies of <sup>1</sup>H NMR, <sup>19</sup>F NMR and <sup>13</sup>C NMR Spectra</b> ..... | S-25 |
| <b>7. Copies of HPLC Traces</b> .....                                                          | S-93 |

## 1. General Information

$^1\text{H}$  NMR and  $^{13}\text{C}$  NMR were recorded on a 400MHz Nuclear Magnetic Resonance Spectrometer ( $^1\text{H}$  NMR: 400MHz,  $^{13}\text{C}$  NMR: 100MHz) using TMS as internal reference. The chemical shifts ( $\delta$ ) and coupling constants ( $J$ ) were expressed in ppm and Hz, respectively. UV-Vis Spectrophotometry was carried out on infrared spectrometer. HPLC analysis was carried out on HPLC with a multiple wavelength detector by commercial chiral columns. Optical rotations were measured on a Polarimeter. HRMS (ESI) were recorded on a Q-TOF Premier. Commercially available compounds were used without further purification. Solvents were purified according to the standard procedures unless otherwise noted.

L2 and L3 were synthesized according to literature as show in S24<sup>1</sup>. Substrates of **2** were synthesized according to literature as show in S24<sup>2</sup>.

## 2. General procedure for the preparation of L

### a) Preparation for ligand L1, L4, L5

4-bromo-2-(trifluoromethyl)phenol (60 mmol) was added to a oven dried Schlenck flask under nitrogen. Then anhydrous THF (100 mL) and DMF (10 mL) was added as solvent. The solution was cooled to 0°C and NaH (90 mmol) was added, the resulting solution was kept at this temperature for 1 h, then benzyl bromide was (65 mmol) was added slowly, the cooling bath was removed, allowing the reaction mixture to warm up to room temperature overnight. Finally, the reaction mixture was quenched with water (10 mL) and extracted with Et<sub>2</sub>O (3 × 50 mL), the organic layers were combined and dried over anhydrous Na<sub>2</sub>SO<sub>4</sub> and concentrated in vacuo. The crude product **G-1** was obtained as a colorless oil and used for the next step without purification.

To a round bottom flask was added magnesium strips (70.0 mmol), one small crystal of iodine, and 1-(benzyloxy)-4-bromo-2-(trifluoromethyl)benzene (**G-1**) (5 mmol) in dry THF (15 mL). The reaction mixture was stirred at reflux to start the reaction. A solution of 1-(benzyloxy)-4-bromo-2-(trifluoromethyl)benzene (**G-1**) (55 mmol) in dry THF (50 ml) was added dropwise over 30 min. After addition, the reaction mixture was continued to stirring at reflux for 1.0 hours and cooled to room temperature. Then a solution of long-chain aldehyde (55 mmol) in dry THF (30 ml) was added dropwise to the Grignard reagent at room temperature over 30 min. The resulting mixture was further stirred overnight and was then quenched with saturated aqueous solution of NH<sub>4</sub>Cl. The product was extracted with ethyl acetate and the combined organic phase was dried over Na<sub>2</sub>SO<sub>4</sub>. The solvent was evaporated under reduced pressure and the crude product **G-2** was used for next step without purification.

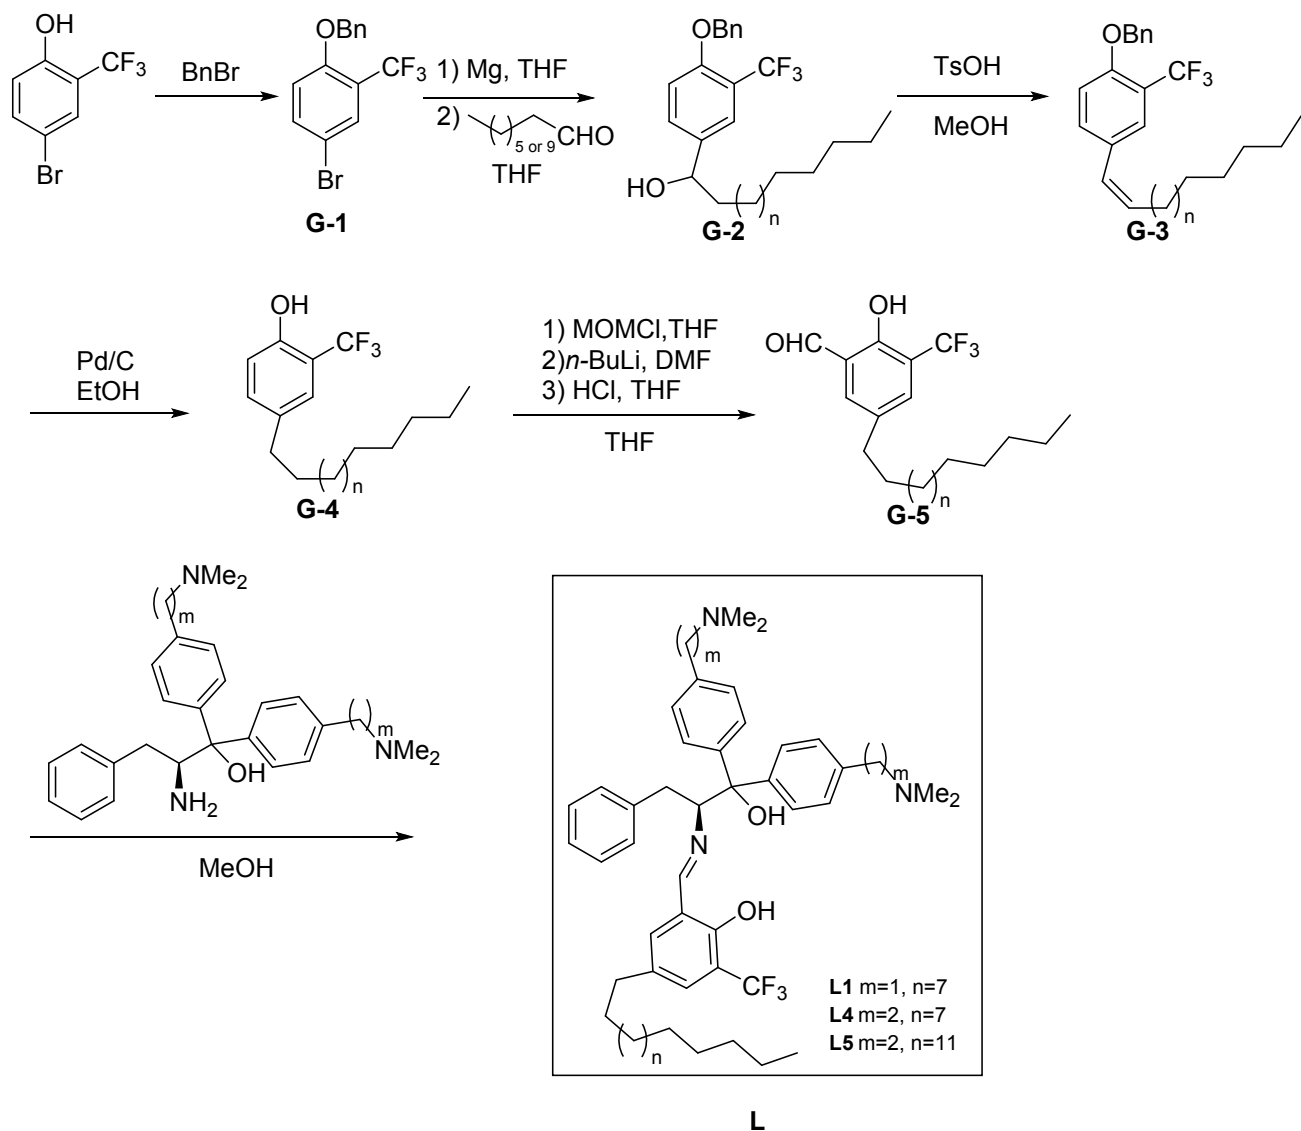

The alcohol product **G-2** obtained was dissolved in toluene (100 mL), and *p*-toluenesulfonic acid (catalytic amount) was added and the solution was heated to 90-100°C until the alcohol disappeared from TLC analysis. The reaction was then cooled to room temperature and quenched by saturated ammonium chloride solution, extracted by ether (100 mL  $\times$  3), dried over  $\text{MgSO}_4$ . Then, the reaction was filtered, concentrated in vacuo to give the alkene crude product **G-3**.

The crude alkene product was dissolved in ethyl alcohol (80 mL),  $\text{Pd/C}$  (5%) was added, and the solution was then purged with hydrogen balloon for 15 minutes and then went overnight under hydrogen balloon. Then, the reaction was filtered over a short path of celite, concentrated in vacuo, and the crude mixture was purified by flash column chromatography (hexane) to afford product **G-4**.

Sodium hydride (2.80 g of a 60% dispersion in mineral oil, 70 mmol) was washed with hexane and transferred to a 2-neck 250 mL round bottom flask under an atmosphere of  $\text{N}_2$ . After addition of anhydrous  $\text{THF}$  (50 mL) the slurry was cooled with stirring to 0°C. To the resulting grey suspension

was added dropwise a solution of **G-4** in anhydrous THF (25 mL) at such a rate that the evolution of hydrogen did not become too vigorous. After complete addition the ice bath was removed and the brown reaction mixture stirred for 1 hour. Chloromethylmethyl ether (5.5 mL, 70 mmol) was added dropwise and the resulting white suspension stirred overnight. Ice/water (100 mL) was added cautiously and the mixture extracted with Et<sub>2</sub>O (3 × 100 mL). The combined Et<sub>2</sub>O extracts were washed with NaOH (2M, 50 mL), HCl (2M, 50 mL), and brine (50 mL). The solution was dried over MgSO<sub>4</sub> and the solvent was removed in vacuo to yield a colourless liquid. To a solution of the colourless liquid in anhydrous THF (100 mL) at -78°C under an atmosphere of N<sub>2</sub> was added *n*-butyllithium (24.0 mL of a 2.5 M solution, 60 mmol) dropwise with stirring. After an additional hour stirring at this temperature, a solution of anhydrous DMF (5.5 mL, 70 mmol) in anhydrous THF (10 mL) was added to the mixture and the resulting solution was allowed to warm to room temperature and stirred overnight. The yellow solution was hydrolysed by the addition of water (150 mL) and the mixture extracted with Et<sub>2</sub>O (3 × 150 mL). The combined Et<sub>2</sub>O extracts were then washed with 2M HCl (100 mL) and brine (100 mL), dried over MgSO<sub>4</sub> and the solvent was removed in vacuo to yield the corresponding aldehyde. Corresponding aldehyde was dissolved in THF (100 mL) and concentrated HCl (10 mL) was added. The mixture was heated to 50°C for 4 hours, at which stage TLC analysis (silica, CH<sub>2</sub>Cl<sub>2</sub>) indicated the complete disappearance of starting material. The mixture extracted with Et<sub>2</sub>O (3 × 50 mL). The combined Et<sub>2</sub>O extracts were then washed with brine (100 mL), dried over MgSO<sub>4</sub> and the solvent was removed in vacuo to yield the crude salicylaldehyde derivative **G-5**.

To a solution of chiral amino alcohol (2 mmol) in methanol (10 mL) was added corresponding salicylaldehyde derivative (2 mmol). The solution was stirred for 2 h at room temperature then the solvent was removed under reduced pressure. The residue was purified by silica gel column chromatography (CH<sub>2</sub>Cl<sub>2</sub>/MeOH = 5/1 as eluent) to give the corresponding Schiff base ligand **L1**, **L4**, **L5**.

#### **b) Preparation for ligand L2**

To a round bottom flask was added magnesium strips (0.36 g, 15 mmol), one small crystal of iodine, and 4-bromo-*N*, *N*-dimethylbenzylamine in dry THF (25 mL). The reaction mixture was stirred at reflux to start the reaction. A solution of 4-bromo-*N*, *N*-dimethylbenzylamine (3.20 g, 15 mmol) in dry THF (5 mL) was added dropwise over 30 min. After addition, the reaction mixture was continued to stirring at reflux for 2 hours and cooled to room temperature. Then a solution of methyl (*tert*-butoxycarbonyl)-*L*-phenylalaninate (1.40 g, 5 mmol) in dry THF (5 mL) was added dropwise to the Grignard reagent at room temperature over 30 min. The resulting mixture was further stirred overnight and was then quenched with saturated aqueous solution of NH<sub>4</sub>Cl. The product was extracted with

ethyl acetate and the combined organic phase was dried over  $\text{Na}_2\text{SO}_4$ . The solvent was evaporated under reduced pressure and the crude product was used for next step without purification.

The crude product in  $\text{CH}_2\text{Cl}_2$  (15 mL) was added 2,2,2-Trifluoroacetic acid (10 mL), then the reaction mixture was stirred at room temperature for 5h and concentrated under reduced pressure. To the residue was added aqueous HCl (2 M, 5.0 mL) and the mixture was extracted with ethyl acetate (3 x 5 mL). The aqueous layer was basified with aqueous buffer solution of  $\text{NH}_3$  (1 M)/ $\text{NH}_4\text{Cl}$  (1 M) and extracted with dichloromethane (3 x 10 mL). The combined organic phases were dried over anhydrous sodium sulfate and concentrated under reduced pressure, the crude product was purified by column chromatography ( $\text{CH}_2\text{Cl}_2/\text{MeOH}/\text{NEt}_3 = 100:10:1$ ) to give product

To a solution of chiral amino alcohol (2 mmol) in methanol (10 mL) was added salicylaldehyde derivative (2 mmol). The solution was stirred for 2 h at room temperature then the solvent was removed under reduced pressure. The residue was purified by silica gel column chromatography ( $\text{CH}_2\text{Cl}_2/\text{MeOH} = 5/1$  as eluent) to give the corresponding Schiff base ligand **L2** quantitatively as yellow foam.

### c) Preparation for ligand L3

To a round bottom flask was added magnesium strips (0.36 g, 15 mmol), one small crystal of iodine, and 2-(4-bromophenyl)-*N,N*-dimethylethan-1-amine in dry THF (25 mL). The reaction mixture was stirred at reflux to start the reaction. A solution of 2-(4-bromophenyl)-*N,N*-dimethylethan-1-amine (3.41 g, 15 mmol) in dry THF (5 ml) was added dropwise over 30 min. After addition, the reaction mixture was continued to stirring at reflux for 2 hours and cooled to room temperature. Then a solution of methyl (*tert*-butoxycarbonyl)-*L*-phenylalaninate (1.40 g, 5 mmol) in dry THF (5 ml) was added dropwise to the Grignard reagent at room temperature over 30 min. The resulting mixture was further stirred overnight and was then quenched with saturated aqueous solution of  $\text{NH}_4\text{Cl}$ . The product was extracted with ethyl acetate and the combined organic phase was dried over  $\text{Na}_2\text{SO}_4$ . The solvent was evaporated under reduced pressure and the crude product was purified by silica gel column chromatography ( $\text{CH}_2\text{Cl}_2/\text{MeOH}/\text{NEt}_3 = 100:10:1$ ) to give *tert*-butyl (1, 1-bis(4-(2-(dimethylamino)ethyl)phenyl)-1-hydroxy-3-phenylpropan-2-yl)carbamate as a colorless oil (2.37g, 87% yield). The product in  $\text{CH}_2\text{Cl}_2$  (15 mL) was added 2,2,2-Trifluoroacetic acid (10 mL), then the reaction mixture was stirred at room temperature for 5 h and concentrated under reduced pressure. To the residue was added aqueous HCl (2 M, 5.0 mL) and the mixture was extracted with ethyl acetate (3 x 5 mL). The aqueous layer was basified with aqueous buffer solution of  $\text{NH}_3$  (1 M)/ $\text{NH}_4\text{Cl}$  (1 M) and extracted with dichloromethane (3 x 10 mL). The combined organic phases were dried over anhydrous sodium sulfate and concentrated under reduced pressure, the crude product was used for next step without purification.

To a solution of chiral amino alcohol (2 mmol) in methanol (10 mL) was added salicylaldehyde derivative (2 mmol). The solution was stirred for 2 h at room temperature then the solvent was removed under reduced pressure. The residue was purified by silica gel column chromatography ( $\text{CH}_2\text{Cl}_2/\text{MeOH} = 5/1$  as eluent) to give the corresponding Schiff base ligand **L3** quantitatively as yellow foam.

### 3. General procedure for the reaction

A mixture of **L4** (0.02 mmol, 14.6 mg),  $\text{Zn}(\text{NO}_3)_2$  (0.02 mmol, 3.7 mg) in water (1.0 mL) was stirred for 1 h at ambient atmosphere.  $\text{CHCl}_3$  (50  $\mu\text{L}$ ) as the oil phase of emulsion was then added to generate the emulsified system. 2-Enoylpyridine 1-oxides and indoles were added to the emulsion and kept at 25 °C for 24 h and the organic phase was separated after demulsification by adding a small amount of dilute hydrochloric acid (1 M, 0.4 mL), the resulting solution was concentrated under reduced pressure, the residue was purified by column chromatograph to afford Michael adducts.

### 4. Mechanism study

#### (1) TEM and SEM analyses

##### 1) Preparation of samples

**Catalyst:** **L4** (7.2 mg, 0.01 mmol) and  $\text{Zn}(\text{NO}_3)_2$  (3.6 mg 0.01 mmol) were dissolved in 1 mL of  $\text{H}_2\text{O}$ . The mixture was stirred at 25°C for 1 h.  $\text{CHCl}_3$  (50  $\mu\text{L}$ ) as the oil phase of emulsion was then added to generate the emulsified system. The mixture was stirred at 25°C for 1 h.

**Reaction mixture:** After preparing the catalyst, indole (11.7 mg 0.1 mmol) and 2-Enoylpyridine 1-oxide (22.5 mg 0.1 mmol) were added to the solution. Then the solution was stirred at 25°C for 1 h.

A drop of the colloidal aqueous suspensions was deposited on a carbon-coated copper grid. Then the excess solution was immediately removed with the help of filter paper. The grid was dried in air and then observed by TEM and SEM.

##### 2) SEM analyses (Fig S1)

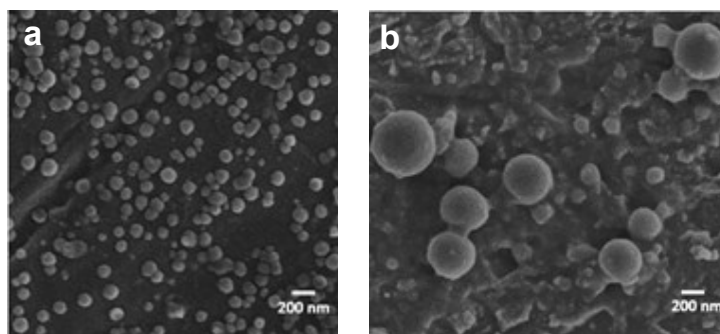

Fig S1a. Metallomicelles of precatalyst (**Zn-L4**); Fig S1b. Metallomicelles of reaction mixture

### 3). TEM analyses (Fig S2)

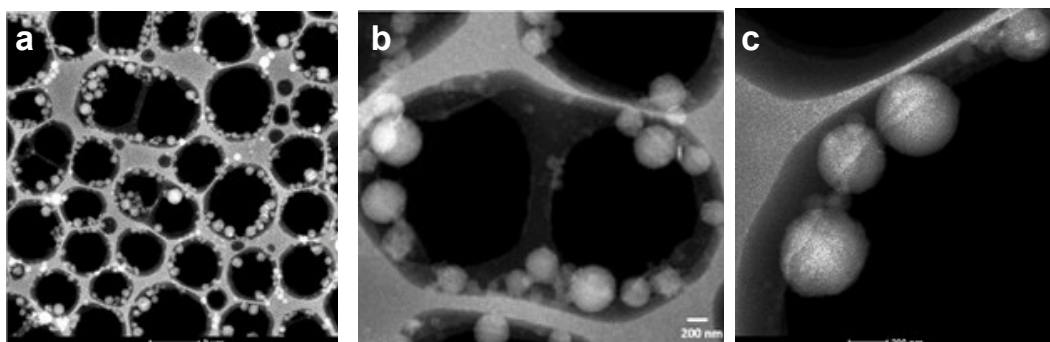

Fig S2. Metallomicelles of reaction mixture

## (2) XPS analyses

### a) Preparation of samples

Sample 1:  $\text{Zn}(\text{NO}_3)_2$ .

Sample 2: the pre-catalyst was prepared by mixing L4 (0.02 mmol) and  $\text{Zn}(\text{NO}_3)_2$  (0.02 mmol) in water only and stirred for two hours at ambient atmosphere, then evaporated in vacuum.

Sample 3: the pre-catalyst was prepared by mixing L4 (0.02 mmol) and  $\text{Zn}(\text{NO}_3)_2$  (0.02 mmol) in water (1 ml) and stirred for one hour at ambient atmosphere.  $\text{CHCl}_3$  (50  $\mu\text{L}$ ) as the oil phase of emulsion was then added to generate the emulsified system. The water of the metallomicellar catalytic system was removed by anhydrous  $\text{MgSO}_4$ . The oil phase was separated, evaporated in vacuum to obtain the precatalyst.

Sample 4: the pre-catalyst was prepared by mixing L4 (0.02 mmol) and  $\text{Zn}(\text{NO}_3)_2$  (0.02 mmol) in  $\text{CHCl}_3$  only and stirred for two hours at ambient atmosphere, then evaporated in vacuum.

The spectra of the XPS was as showed in Fig S3. The results showed that the binding energy of the Zn 2P of the precatalyst was decreased compared to that of  $\text{Zn}(\text{NO}_3)_2$ , which indicated that electronic density of the  $\text{Zn}^{2+}$  was increased. This increasement should come from the coordination with the oxygen of the L4.

### b) Spectra of XPS (Fig S3).

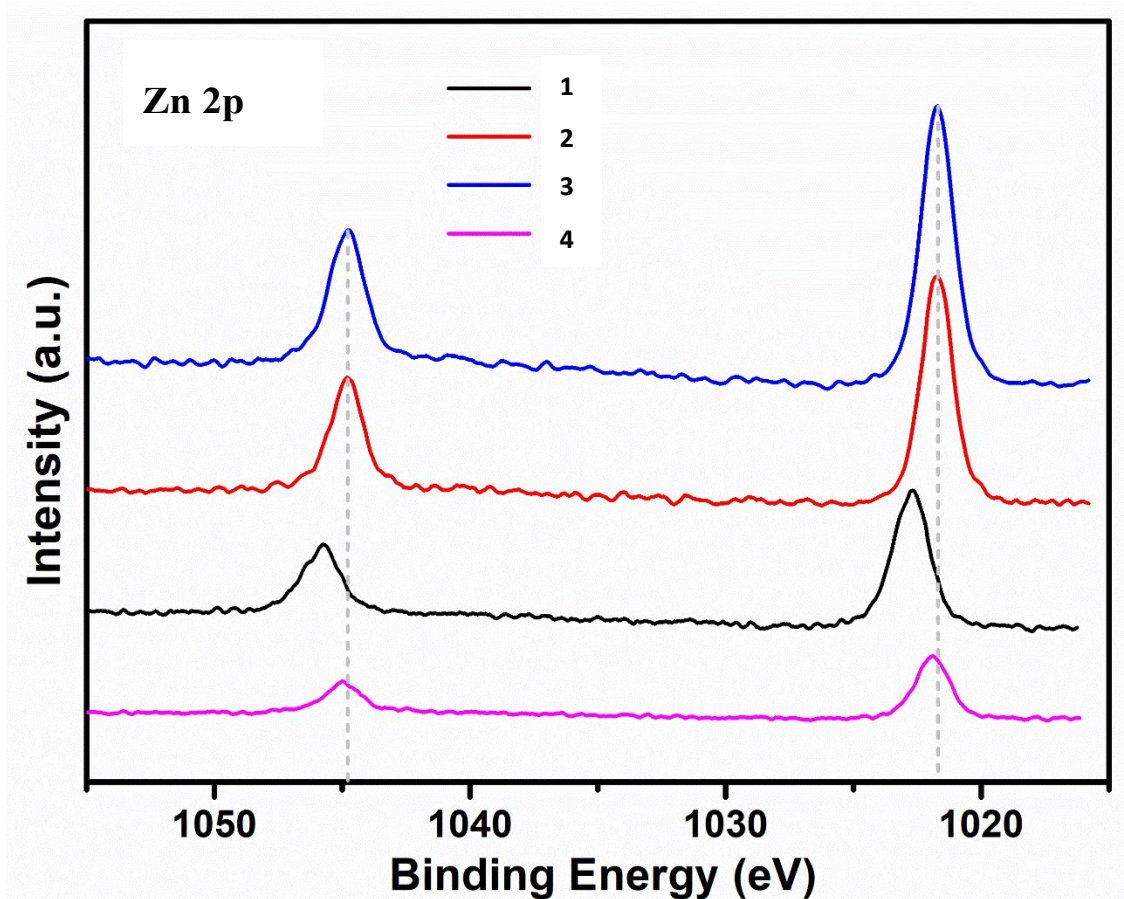

Fig S3 Analyses of XPS

### (3) The detection of $^1\text{H}$ NMR to confirm the formation of two ammonium salts

The micellar catalytic system was prepared by mixing ligand **4** (0.02 mmol) and  $\text{Zn}(\text{NO}_3)_2$  (0.02 mmol) in water (1 mL) and stirred for one hour at ambient atmosphere.  $\text{CDCl}_3$  (50  $\mu\text{L}$ ) as the oil phase of emulsion was then added to generate the emulsified system. The water of the metallomicellar catalytic system was removed by anhydrous  $\text{MgSO}_4$ . The oil phase was separated, evaporated in vacuum to obtain the precatalyst, which was characterized by  $^1\text{H}$  NMR.

$^1\text{H}$  NMR response of the precatalyst and ligand **4** was listed in Fig S4. It was found that chemical shifts of the methyl groups attached to the N presented in lower field compared to that of **L4**, which can be ascribed to the electron-withdrawing effect of the generated ammonium salts.



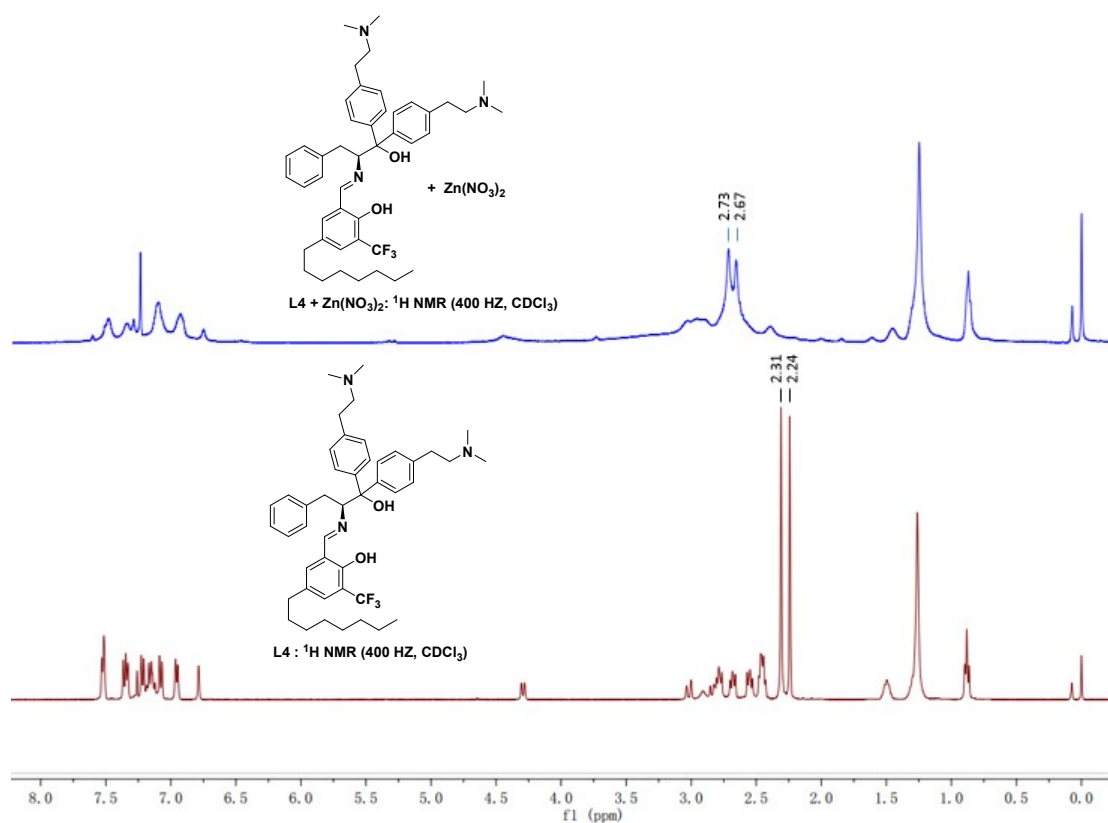

Fig S4  $^1\text{H}$  NMR of the precatalyst (**Zn-L4**)

#### (4) The detection of IR to confirm the formation of the ammonium salts

The test of IR to confirm the formation of ammonium salts was shown in Fig S5. The infra-red absorption peak of ammonium salt group could be observed at  $1250\text{--}1450\text{ cm}^{-1}$  through comparative analyses of the difference between tertiary amine **G-6** and the corresponding nitrate **G-7**. As to the test of a similar catalytic system (**L2**+ $\text{Zn}(\text{NO}_3)_2$ ), a strong absorption peak was found at the same wavelength range, that directly revealed the formation of ammonium salts.

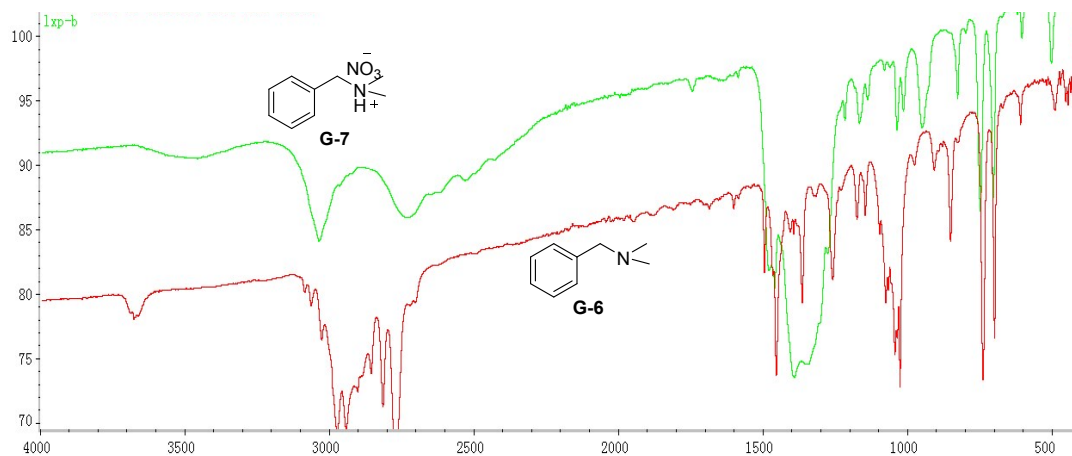

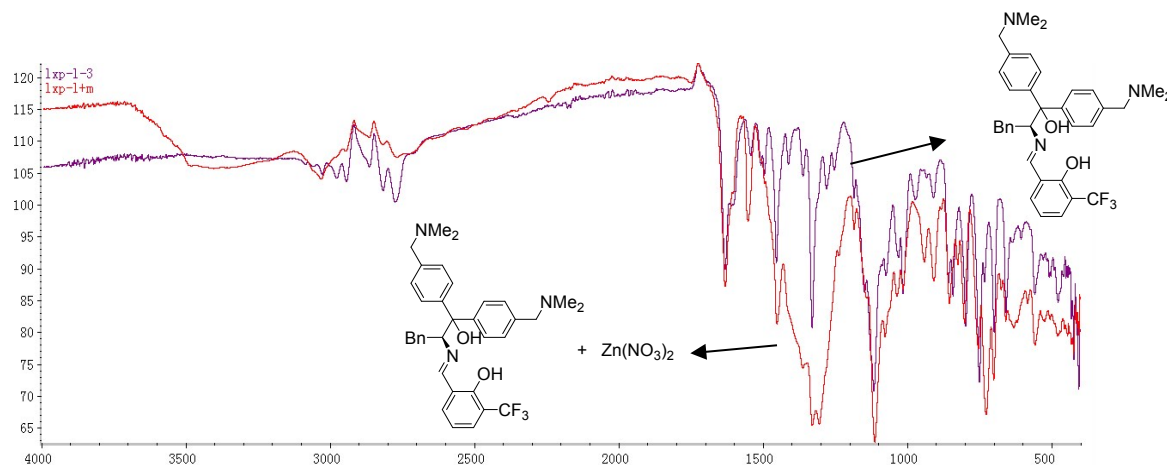

Fig S5 IR test of the formation of two ammonium salts

## (5) The pH detection

### 1. General procedure for the pH analyse

(a) Zinc salt (0.01 mmol) was dissolved in 1 mL of H<sub>2</sub>O, and the obtained aqueous solution was directly tested by Portable pH meter (Model: S2-Meter, Manufacturer: Mettler-Toledo).

(b) Zinc salt (0.01 mmol) and L4 (0.01 mmol) was dissolved in 1 mL of H<sub>2</sub>O. The mixture was stirred at 25°C for 1 h and the obtained aqueous solution was directly tested by Portable pH meter (Model: S2-Meter, Manufacturer: Mettler-Toledo).

(c) Zinc salt (0.01 mmol) and L4 (0.01 mmol) was dissolved in 1 mL of H<sub>2</sub>O. The mixture was stirred at 25°C for 1 h. CHCl<sub>3</sub> (50 μL) as the oil phase of emulsion was then added to generate the emulsified system. The mixture was stirred at 25°C for 1 h and the obtained emulsion was directly tested by Portable pH meter (Model: S2-Meter, Manufacturer: Mettler-Toledo).

### 2. Results of the pH test

| Zinc salt                         | Procedure | (a)  | (b)  | (c)  |
|-----------------------------------|-----------|------|------|------|
|                                   | pH        |      |      |      |
| Zn(NO <sub>3</sub> ) <sub>2</sub> |           | 5.45 | 6.10 | 5.43 |
| ZnF <sub>2</sub>                  |           | 5.68 | 6.32 | 5.51 |
| ZnCl <sub>2</sub>                 |           | 5.69 | 6.14 | 5.54 |
| ZnBr <sub>2</sub>                 |           | 5.40 | 6.15 | 5.64 |
| ZnSO <sub>4</sub>                 |           | 5.56 | 6.13 | 5.62 |

## 5. Experimental data of the reaction

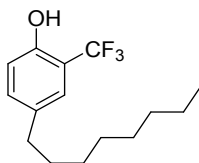

### 4-octyl-2-(trifluoromethyl)phenol

87% yield over four steps.  $^1\text{H}$  NMR (400 MHz,  $\text{CDCl}_3$ )  $\delta$  7.29 (s, 1H), 7.23-7.19 (d,  $J = 8.4$  Hz, 1H), 6.91-6.83 (d,  $J = 8.4$  Hz, 1H), 5.43 (s, 1H), 2.56 (t,  $J = 7.6$  Hz, 2H), 1.70-1.51 (m, 2H), 1.40-1.15 (m, 10H), 0.88 (t,  $J = 6.8$  Hz, 3H);  $^{13}\text{C}$  NMR (100 MHz,  $\text{CDCl}_3$ )  $\delta$  151.4, 135.3, 133.4, 128.4-120.2 (q,  $J = 270.5$  Hz), 126.3, 117.6, 116.5-115.6 (q,  $J = 29.7$  Hz), 34.9, 31.9, 31.5, 29.4, 29.24, 29.16, 22.7, 14.1;  $^{19}\text{F}$  NMR (376 MHz,  $\text{CDCl}_3$ )  $\delta$  -60.7; HRMS (ESI)  $m/z$  calcd for  $\text{C}_{15}\text{H}_{22}\text{F}_3\text{O}$   $[\text{M}+\text{H}]^+$  275.1623, found 275.1628.

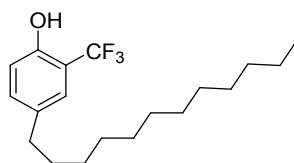

### 4-dodecyl-2-(trifluoromethyl)phenol

85% yield over four steps.  $^1\text{H}$  NMR (400 MHz,  $\text{CDCl}_3$ )  $\delta$  7.29 (s, 1H), 7.24-7.18 (d,  $J = 8.4$  Hz, 1H), 6.90-6.83 (d,  $J = 8.4$  Hz, 1H), 5.31 (s, 1H), 2.56 (t,  $J = 7.6$  Hz, 2H), 1.70-1.51 (m, 2H), 1.40-1.20 (m, 18H), 0.88 (t,  $J = 7.0$  Hz, 3H);  $^{13}\text{C}$  NMR (100 MHz,  $\text{CDCl}_3$ )  $\delta$  151.3, 135.4, 133.4, 128.4-120.2 (q,  $J = 270.5$  Hz), 126.3, 117.6, 116.5-115.6 (q,  $J = 29.7$  Hz), 34.9, 31.9, 31.5, 29.68, 29.66, 29.6, 29.5, 29.4, 29.2, 22.7, 14.1;  $^{19}\text{F}$  NMR (376 MHz,  $\text{CDCl}_3$ )  $\delta$  -60.6; HRMS (ESI)  $m/z$  calcd for  $\text{C}_{19}\text{H}_{30}\text{F}_3\text{O}$   $[\text{M}+\text{H}]^+$  331.2249, found 331.2235.

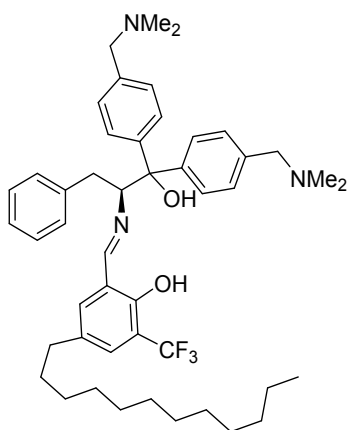

**(*S, E*)-2-(((1,1-bis(4-((dimethylamino)methyl)phenyl)-1-hydroxy-3-phenylpropan-2-yl)imino)**

**methyl)-4-dodecyl-6-(trifluoromethyl)phenol (L1)**

$^1\text{H}$  NMR (400 MHz,  $\text{CDCl}_3$ ):  $\delta$  13.55 (br, 1H), 7.61-7.30 (m, 8H), 7.20-7.10 (m, 5H), 7.00-6.94 (m, 2H), 6.80-6.70 (m, 1H), 4.35-4.29 (m, 1H), 3.50-3.24 (m, 4H), 3.04-2.80 (m, 3H), 2.46-2.41 (m, 2H),

2.27 (s, 6H), 2.11 (s, 6H), 1.53-1.46 (m, 2H), 1.26 (s, 18H), 0.88 (t,  $J = 6.9$  Hz, 3H);  $^{13}\text{C}$  NMR (100 MHz,  $\text{CDCl}_3$ ):  $\delta$  165.9, 157.4, 144.1, 142.8, 138.8, 137.7, 137.4, 134.5, 132.0, 129.7, 129.3, 129.2, 128.4, 127.7, 126.4, 126.0, 125.9, 125.0-122.3 (q,  $J = 270.9$  Hz), 118.8, 117.6-117.0 (q,  $J = 30.3$  Hz), 79.7, 78.9, 63.9, 63.8, 45.4, 45.2, 37.3, 34.6, 31.9, 31.4, 29.7, 29.65, 29.57, 29.44, 29.36, 29.1, 22.7, 14.1;  $^{19}\text{F}$  NMR (376 MHz,  $\text{CDCl}_3$ )  $\delta$  -62.4;  $[\alpha]_{\text{D}}^{25}$  -66.8 (c 1.0,  $\text{CHCl}_3$ ); HRMS (ESI)  $m/z$  calcd for  $\text{C}_{47}\text{H}_{63}\text{F}_3\text{N}_3\text{O}_2$   $[\text{M}+\text{H}]^+$  758.4872, found 758.4878.

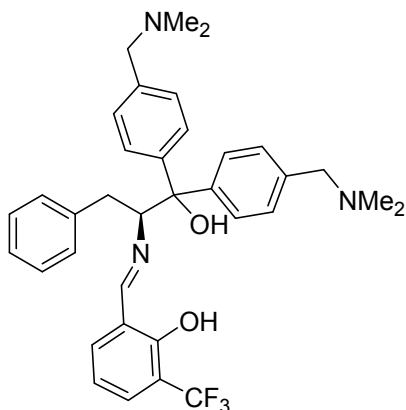

**(*S,E*)-2-(((1,1-bis(4-((dimethylamino)methyl)phenyl)-1-hydroxy-3-phenylpropan-2-yl)imino)methyl)-6-(trifluoromethyl)phenol (L2)**

$^1\text{H}$  NMR (400 MHz,  $\text{CDCl}_3$ ):  $\delta$  13.91 (br, 1 H), 7.64-7.30 (m, 8 H), 7.20-7.11 (m, 5 H), 7.00-6.94 (m, 3 H), 6.80-6.70 (m, 1 H), 4.35-4.31 (m, 1 H), 3.51-3.22 (m, 4 H), 3.10-3.01 (m, 2 H), 2.91-2.79 (m, 1 H), 2.24 (s, 6 H), 2.11 (s, 6 H);  $^{13}\text{C}$  NMR (100 MHz,  $\text{CDCl}_3$ ):  $\delta$  165.8, 160.0, 144.0, 142.7, 138.7, 137.7, 137.4, 135.1, 129.9, 129.7, 129.3, 129.2, 128.5, 126.5, 126.0, 125.9, 124.9-122.2 (q,  $J = 270.0$  Hz), 118.8, 118.4-117.5 (q,  $J = 30.0$  Hz), 117.3, 79.6, 78.7, 63.9, 63.7, 45.4, 45.2, 37.2;  $^{19}\text{F}$  NMR (376 MHz,  $\text{CDCl}_3$ )  $\delta$  -62.6.

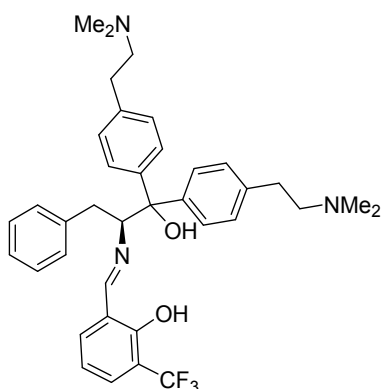

**(*S,E*)-2-(((1,1-bis(4-(2-(dimethylamino)ethyl)phenyl)-1-hydroxy-3-phenylpropan-2-yl)imino)methyl)-6-(trifluoromethyl)phenol (L3)**

$^1\text{H}$  NMR (400 MHz,  $\text{CDCl}_3$ ):  $\delta$  7.54-7.50 (m, 4 H), 7.40-7.31 (m, 2 H), 7.25-7.00 (m, 8 H), 7.05-6.91 (m, 3 H), 6.81-6.70 (m, 1 H), 4.31 (d,  $J = 8.9$  Hz, 1 H), 3.38 (br, 1 H), 3.08-3.01 (d,  $J = 13.0$  Hz, 1 H), 2.88-2.72 (m, 4 H), 2.71-2.64 (m, 2 H), 2.62-2.51 (m, 2 H), 2.50-2.41 (m, 2 H), 2.30 (s, 6 H), 2.23 (s,

6 H);  $^{13}\text{C}$  NMR (100 MHz,  $\text{CDCl}_3$ ):  $\delta$  165.6, 160.5, 142.9, 141.8, 139.0, 138.9, 138.7, 135.2, 130.0, 129.7, 128.8, 128.6, 128.4, 126.5, 126.3, 126.1, 125.0-122.3 (q,  $J = 270.9$  Hz), 118.8, 118.2-117.9 (q,  $J = 30.4$  Hz), 117.1, 79.4, 78.5, 61.2, 61.1, 45.3, 45.2, 37.3, 33.7, 33.5;  $^{19}\text{F}$  NMR (376 MHz,  $\text{CDCl}_3$ )  $\delta$  -62.6.

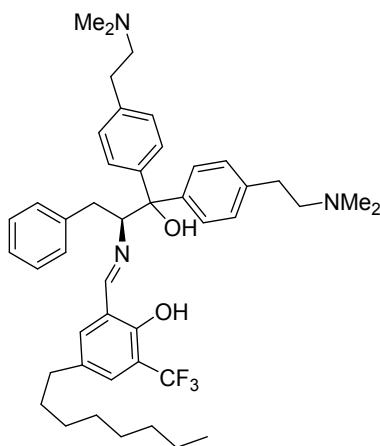

**(*S, E*)-2-(((1,1-bis(4-(2-(dimethylamino)ethyl)phenyl)-1-hydroxy-3-phenylpropan-2-yl)imino)methyl)-4-octyl-6-(trifluoromethyl)phenol (L4)**

$^1\text{H}$  NMR (400 MHz,  $\text{CDCl}_3$ ):  $\delta$  13.63 (br, 1 H), 7.53-7.33 (m, 6 H), 7.25-7.00 (m, 7 H), 7.00-6.90 (m, 2 H), 6.80-6.78 (m, 1 H), 4.35-4.27 (m, 1 H), 3.27-3.00 (m, 2 H), 2.90-2.70 (m, 3 H), 2.69-2.63 (m, 2 H), 2.55-2.40 (m, 6 H), 2.29 (s, 6 H), 2.22 (s, 6 H), 1.52-1.46 (m, 2 H), 1.26 (s, 10 H), 0.88 (t,  $J = 6.9$  Hz, 3H);  $^{13}\text{C}$  NMR (100 MHz,  $\text{CDCl}_3$ ):  $\delta$  165.7, 157.7, 143.0, 141.9, 139.1, 139.0, 138.9, 134.6, 131.9, 129.7, 129.0, 128.7, 128.6, 128.4, 126.4, 126.3, 126.1, 125.1-122.4 (q,  $J = 271.0$  Hz), 118.8, 117.9-117.3 (q,  $J = 30.0$  Hz), 79.5, 78.8, 61.4, 61.2, 45.42, 45.36, 37.4, 34.7, 33.8, 33.7, 31.9, 31.4, 29.4, 29.2, 29.1, 22.7, 14.1;  $^{19}\text{F}$  NMR (376 MHz,  $\text{CDCl}_3$ )  $\delta$  -62.3;  $[\alpha]_{\text{D}}^{25}$  -88.6 (c 1.0,  $\text{CHCl}_3$ ); HRMS (ESI)  $m/z$  calcd for  $\text{C}_{45}\text{H}_{59}\text{F}_3\text{N}_3\text{O}_2$   $[\text{M}+\text{H}]^+$  730.4559, found 730.4551.

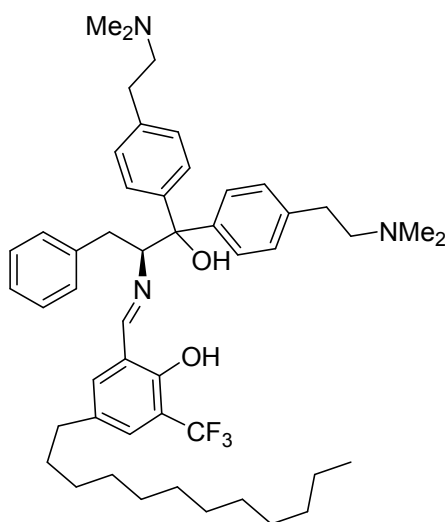

**(*S, E*)-2-(((1,1-bis(4-(2-(dimethylamino)ethyl)phenyl)-1-hydroxy-3-phenylpropan-2-yl)imino)methyl)-4-dodecyl-6-(trifluoromethyl)phenol (L5)**

$^1\text{H}$  NMR (400 MHz,  $\text{CDCl}_3$ ):  $\delta$  13.59 (br, 1 H), 7.53-7.30 (m, 6 H), 7.23-7.00 (m, 7 H), 6.98-6.90 (m, 2 H), 6.80-6.78 (m, 1 H), 4.35-4.27 (m, 1 H), 3.10-2.90 (m, 2 H), 2.86-2.70 (m, 3 H), 2.69-2.65 (m, 2 H), 2.55-2.40 (m, 6 H), 2.30 (s, 6 H), 2.23 (s, 6 H), 1.52-1.47 (m, 2 H), 1.26 (s, 18 H), 0.88 (t,  $J = 6.6$  Hz, 3H);  $^{13}\text{C}$  NMR (100 MHz,  $\text{CDCl}_3$ ):  $\delta$  165.8, 157.5, 143.0, 141.8, 139.1, 139.0, 138.9, 134.5, 132.0, 129.7, 128.7, 128.6, 128.4, 126.4, 126.2, 126.0, 125.0-122.3 (q,  $J = 270.9$  Hz), 118.8, 117.9-117.3 (q,  $J = 30.6$  Hz), 79.5, 78.8, 61.3, 61.2, 45.42, 45.36, 37.4, 34.6, 33.8, 33.7, 31.9, 31.4, 29.66, 29.65, 29.58, 29.43, 29.35, 29.1, 22.7, 14.1;  $^{19}\text{F}$  NMR (376 MHz,  $\text{CDCl}_3$ )  $\delta$  -62.4;  $[\alpha]_{\text{D}}^{25}$  -73.8 (c 1.0,  $\text{CHCl}_3$ ); HRMS (ESI)  $m/z$  calcd for  $\text{C}_{49}\text{H}_{67}\text{F}_3\text{N}_3\text{O}_2$   $[\text{M}+\text{H}]^+$  786.5185, found 786.5192.

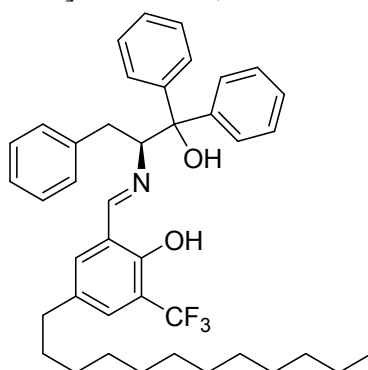

**(*S, E*)-4-dodecyl-2-(((1-hydroxy-1,1,3-triphenylpropan-2-yl)imino)methyl)-6-(trifluoromethyl)phenol (L6)**

$^1\text{H}$  NMR (400 MHz,  $\text{CDCl}_3$ ):  $\delta$  13.53 (br, 1 H), 7.65-7.32 (m, 8 H), 7.30-7.09 (m, 6 H), 6.97-6.94 (m, 2 H), 6.79 (s, 1 H), 4.37-4.32 (m, 1 H), 3.04-3.00 (m, 1 H), 2.90-2.82 (m, 2 H), 2.48-2.42 (m, 2 H), 1.50 (s, 2 H), 1.26 (s, 18 H), 0.88 (t,  $J = 6.6$  Hz, 3H);  $^{13}\text{C}$  NMR (100 MHz,  $\text{CDCl}_3$ ):  $\delta$  166.0, 157.4, 145.3, 144.0, 138.8, 134.6, 132.1, 129.8, 128.6, 128.4, 127.2, 127.1, 126.4, 126.1, 126.0, 125.0, 122.3, 118.7, 117.6, 117.3, 79.7, 78.7, 37.3, 34.6, 32.0, 31.4, 29.7, 29.67, 29.6, 29.5, 29.4, 29.1, 22.7, 14.2;  $^{19}\text{F}$  NMR (376 MHz,  $\text{CDCl}_3$ )  $\delta$  -62.4;  $[\alpha]_{\text{D}}^{25}$  -116.6 (c 1.0,  $\text{CHCl}_3$ ); HRMS (ESI)  $m/z$  calcd for  $\text{C}_{41}\text{H}_{48}\text{F}_3\text{NO}_2$   $[\text{M}+\text{H}]^+$  644.3715, found 644.3701.

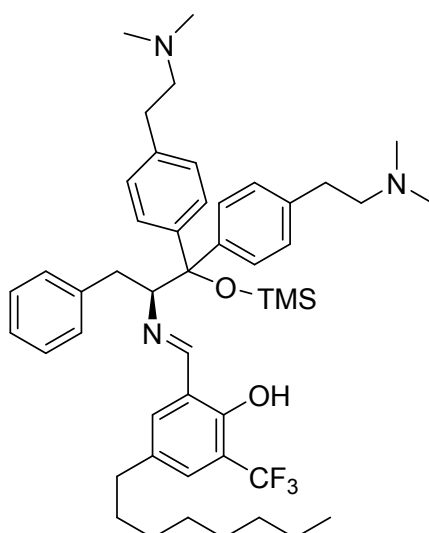

**(*S, E*)-2-(((1,1-bis(4-(2-(dimethylamino)ethyl)phenyl)-3-phenyl-1-((trimethylsilyl)oxy)propan-2-yl)imino)methyl)-4-octyl-6-(trifluoromethyl)phenol (L7)**

$^1\text{H NMR}$  (400 MHz,  $\text{CDCl}_3$ )  $\delta$  13.59 (br, 1 H), 7.72 (s, 1H), 7.54-7.52 (2H), 7.47-7.11 (m, 10H), 6.99-6.96 (2H), 6.91 (s, 1H), 4.23- 4.19 (d, 1H), 3.38-3.33 (2H), 2.93-2.83 (m, 4H), 2.71-2.66 (m, 4H), 2.66-2.52 (t, 2H), 2.40-2.38 (12H), 1.52 (2H), 1.27 (10 H), 0.90-0.86 (3H), -0.18 (9H).  $^{13}\text{C NMR}$  (100 MHz,  $\text{CDCl}_3$ )  $\delta$  164.8, 140.4, 140.2, 139.1, 139.0, 134.4, 131.4, 130.8, 129.5, 129.3, 129.1, 128.2, 127.8, 126.1, 118.8, 82.4, 61.0, 60.9, 45.1, 44.9, 37.8, 34.5, 33.4, 33.3, 31.7, 31.3, 29.3, 29.1, 29.0, 22.5, 13.9, 1.7;  $^{19}\text{F NMR}$  (376 MHz,  $\text{CDCl}_3$ )  $\delta$  -62.3; HRMS (ESI)  $m/z$  calcd for  $\text{C}_{48}\text{H}_{66}\text{F}_3\text{N}_3\text{O}_2\text{Si}$   $[\text{M}+\text{H}]^+$  802.4955, found 802.4961.

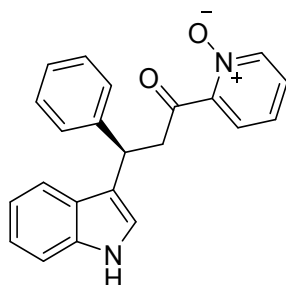

**(*R*)-2-(3-(1H-indol-3-yl)-3-phenylpropanoyl)pyridine 1-oxide (4a)**

The title compound was prepared according to the general working procedure and purified by column chromatography to give the product as a white solid in 90% yield.  $[\alpha]_{\text{D}}^{25} = 19.2$  ( $c = 1.0$ , THF, 94% ee). HPLC on Chiralpak AD-H column, hexane/2-propanol = 80:20, flow rate 1.0 mL/min, 254 nm;  $t_{\text{R}} = 26.50$  min (major) and 31.25 min (minor);  $^1\text{H NMR}$  (400 MHz,  $\text{CDCl}_3$ )  $\delta$  8.29-8.01 (m, 2H), 7.50-7.35 (m, 1H), 7.32-7.18 (m, 6H), 7.15-6.90 (m, 6H), 4.93 (t,  $J = 7.6$  Hz, 1H), 4.11-4.05 (dd,  $J = 16.8$ , 7.2 Hz, 1H), 3.99-3.93 (dd,  $J = 16.4$ , 7.6 Hz, 1H);  $^{13}\text{C NMR}$  (100 MHz,  $\text{CDCl}_3$ )  $\delta$  197.1, 147.1, 143.9, 140.1, 136.5, 128.4, 127.9, 127.5, 126.7, 126.5, 126.4, 125.7, 122.1, 121.6, 119.5, 119.4, 118.7, 111.1, 49.1, 38.6.

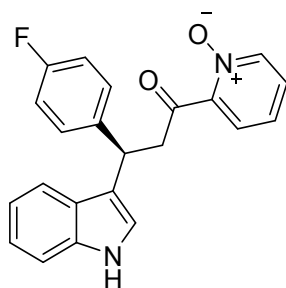

**(R)-2-(3-(4-fluorophenyl)-3-(1H-indol-3-yl)propanoyl)pyridine 1-oxide (4b)**

The title compound was prepared according to the general working procedure and purified by column chromatography to give the product as a white solid in 95% yield.  $[\alpha]_D^{25} = 11.7$  ( $c = 1.0$ , in THF, 91% ee). HPLC on Chiralpak AD-H column, hexane/2-propanol = 80:20, flow rate 1.0 mL/min, 254 nm;  $t_R = 25.15$  min (major) and 32.66 min (minor);  $^1\text{H NMR}$  (400 MHz,  $\text{CDCl}_3$ )  $\delta$  8.29-8.08 (m, 2H), 7.41-7.32 (m, 1H), 7.30-7.18 (m, 5H), 7.15-7.01 (m, 3H), 7.01-6.90 (m, 1H), 6.90-6.80 (m, 2H), 4.93 (t,  $J = 7.6$  Hz, 1H), 4.09-4.03 (dd,  $J = 16.8, 7.6$  Hz, 1H), 3.99-3.92 (dd,  $J = 16.8, 8.0$  Hz, 1H).  $^{13}\text{C NMR}$  (100 MHz,  $\text{CDCl}_3$ )  $\delta$  196.7, 162.6-160.2 (d,  $J = 242.7$  Hz), 146.9, 140.2, 139.7-139.6 (d,  $J = 3.2$  Hz), 136.6, 129.4-129.3 (d,  $J = 7.9$  Hz), 127.7, 126.7, 126.5, 125.7, 122.2, 121.6, 119.44-119.37 (d,  $J = 6.2$  Hz), 118.6, 115.2, 115.0, 111.1, 49.2, 37.7;  $^{19}\text{F NMR}$  (376 MHz,  $\text{CDCl}_3$ )  $\delta$  -113.7.

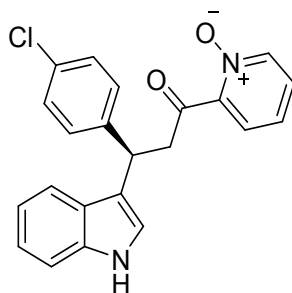

**(R)-2-(3-(4-chlorophenyl)-3-(1H-indol-3-yl)propanoyl)pyridine 1-oxide (4c)**

The title compound was prepared according to the general working procedure and purified by column chromatography to give the product as a white solid in 94% yield.  $[\alpha]_D^{25} = 17.9$  ( $c=1.0$ , THF, 97% ee). HPLC on Daicel Chiralpak AD-H column, n-hexane/2-propanol = 80:20, flow rate 1.0 mL/min, 254 nm;  $t_R = 26.97$  min (major) and 36.95 min (minor);  $^1\text{H NMR}$  (400 MHz,  $\text{CDCl}_3$ )  $\delta$  8.21-8.11 (m, 2H), 7.32-7.18 (m, 1H), 7.22-6.95 (m, 10 H), 6.95-6.80 (m, 1H), 4.85 (t,  $J = 7.6$  Hz, 1H), 4.02-3.96 (dd,  $J = 16.8, 7.6$  Hz, 1H), 3.92-3.85 (dd,  $J = 16.4, 8.0$  Hz, 1H).  $^{13}\text{C NMR}$  (100 MHz,  $\text{CDCl}_3$ )  $\delta$  195.5, 145.8, 141.5, 139.2, 135.5, 130.9, 128.3, 127.4, 126.7, 125.7, 125.4, 124.7, 121.2, 120.6, 118.4, 118.3, 117.2, 110.1, 47.9, 36.7.



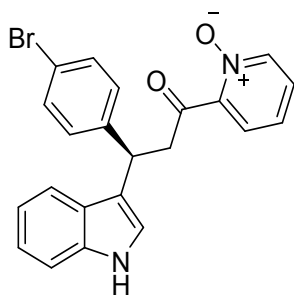

**(R)-2-(3-(4-bromophenyl)-3-(1H-indol-3-yl)propanoyl)pyridine 1-oxide (4d)**

The title compound was prepared according to the general working procedure and purified by column chromatography to give the product as a white solid in 95% yield.  $[\alpha]_{\text{D}}^{25} = 16.1$  ( $c = 1.0$ , THF, 97% ee). HPLC on Chiralpak AD-H column, hexane/2-propanol = 80:20, flow rate 1.0 mL/min, 254 nm;  $t_{\text{R}} = 30.13$  min (major) and 41.18 min (minor);  $^1\text{H}$  NMR (400 MHz,  $\text{CDCl}_3$ )  $\delta$  8.20-8.11 (m, 2H), 7.42-6.93 (m, 12 H), 4.92 (t,  $J = 7.6$  Hz, 1H), 4.10-4.04 (dd,  $J = 16.8, 7.6$  Hz, 1H), 4.00-3.93 (dd,  $J = 16.4, 8.0$  Hz, 1H).  $^{13}\text{C}$  NMR (100 MHz,  $\text{CDCl}_3$ )  $\delta$  196.4, 146.8, 143.0, 140.3, 136.5, 131.4, 129.7, 127.8, 126.8, 126.5, 125.6, 122.3, 121.6, 120.1, 119.5, 119.3, 118.2, 111.0, 48.9, 37.8.

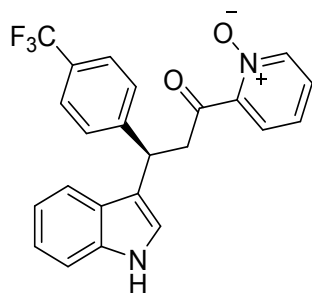

**(R)-2-(3-(1H-indol-3-yl)-3-(4-(trifluoromethyl)phenyl)propanoyl)pyridine 1-oxide (4e)**

The title compound was prepared according to the general working procedure and purified by column chromatography to give the product as a white solid in 93% yield.  $[\alpha]_{\text{D}}^{25} = 10.5$  ( $c = 1.0$ , THF, 95% ee). HPLC on Chiralpak AD-H column, hexane/2-propanol = 80:20, flow rate 1.0 mL/min, 254 nm;  $t_{\text{R}} = 18.65$  min (major) and 23.85 min (minor);  $^1\text{H}$  NMR (400 MHz,  $\text{DMSO}-d_6$ )  $\delta$  10.95 (s, 1H), 8.33-8.31 (d,  $J = 6.4$  Hz, 1H), 7.61-7.50 (m, 5H), 7.39-7.27 (m, 5H), 7.03 (t,  $J = 7.5$  Hz, 1H), 6.89 (t,  $J = 7.8$  Hz, 1H), 4.95-4.90 (m, 1H), 4.09-4.07 (m, 1H), 4.03-3.88 (m, 1H);  $^{13}\text{C}$  NMR (100 MHz,  $\text{DMSO}-d_6$ )  $\delta$  197.3, 150.0, 146.6, 140.6, 136.9, 129.0, 128.9-120.8 (q,  $J = 270.0$  Hz), 127.6-126.7 (q,  $J = 30.0$  Hz), 126.6, 126.4, 126.3, 125.54, 125.50, 122.8, 121.6, 118.9, 117.0, 111.9, 79.6, 48.1, 37.9.  $^{19}\text{F}$  NMR (376 MHz,  $\text{DMSO}-d_6$ )  $\delta$  -60.7; HRMS (ESI)  $m/z$  calcd for  $\text{C}_{23}\text{H}_{17}\text{F}_3\text{N}_2\text{NaO}_2$   $[\text{M}+\text{Na}]^+$  433.1140, found 433.1136.

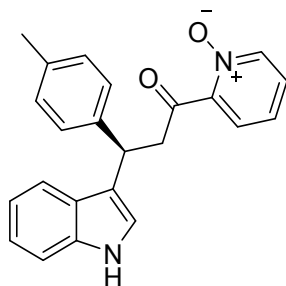

**(R)-2-(3-(1H-indol-3-yl)-3-(p-tolyl)propanoyl)pyridine 1-oxide (4f)**

The title compound was prepared according to the general working procedure and purified by column chromatography to give the product as a white solid in 95% yield.  $[\alpha]_D^{25} = 7.3$  ( $c = 1.0$ , THF, 93% ee). HPLC on Chiralpak AD-H column, hexane/2-propanol = 80:20, flow rate 1.0 mL/min, 254 nm;  $t_R = 25.29$  min (major) and 32.69 min (minor);  $^1\text{H NMR}$  (400 MHz,  $\text{CDCl}_3$ )  $\delta$  8.16-8.14 (d,  $J = 5.6$  Hz, 1H), 8.01 (s, 1 H), 7.45-7.42 (d,  $J = 7.6$  Hz, 1H), 7.32-6.90 (m, 11H), 4.89 (t,  $J = 6.8$  Hz, 1H), 4.11-4.04 (dd,  $J = 16.0, 7.2$  Hz, 1H), 3.97-3.91 (dd,  $J = 16.0, 8.0$  Hz, 1H), 2.26 (s, 3H);  $^{13}\text{C NMR}$  (100 MHz,  $\text{CDCl}_3$ )  $\delta$  197.2, 140.8, 136.5, 135.8, 129.1, 127.7, 127.5, 126.7, 126.6, 125.6, 122.1, 121.5, 119.5, 119.4, 119.1, 111.0, 49.1, 38.1, 21.0.

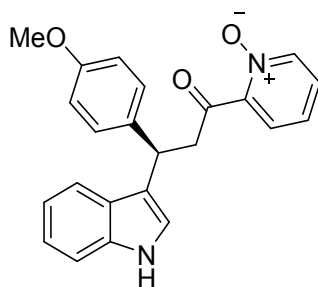

**(R)-2-(3-(1H-indol-3-yl)-3-(4-methoxyphenyl)propanoyl)pyridine 1-oxide (4g)**

The title compound was prepared according to the general working procedure and purified by column chromatography to give the product as a white solid in 92% yield.  $[\alpha]_D^{25} = 17.0$  ( $c = 1.0$ , THF, 87% ee). HPLC on Daicel Chiralpak AD-H column, *n*-hexane/2-propanol = 80:20, flow rate 1.0 mL/min, 254 nm;  $t_R = 40.92$  min (major) and 47.16 min (minor);  $^1\text{H NMR}$  (400 MHz,  $\text{CDCl}_3$ )  $\delta$  8.20-8.09 (m, 2H), 7.45-7.39 (m, 1 H), 7.30-6.95 (m, 9H), 6.80-6.69 (m, 2H), 4.88 (t,  $J = 8.0$  Hz, 1H), 4.08-4.03 (dd,  $J = 16.0, 7.2$  Hz, 1H), 3.96-3.90 (dd,  $J = 16.0, 8.0$  Hz, 1H), 3.72 (s, 3H).  $^{13}\text{C NMR}$  (100 MHz,  $\text{CDCl}_3$ )  $\delta$  197.3, 158.0, 147.2, 140.1, 136.6, 136.0, 128.9, 127.5, 126.7, 126.5, 125.6, 122.0, 121.5, 119.5, 119.3, 119.1, 114.4, 113.7, 111.1, 55.2, 49.2, 37.8.

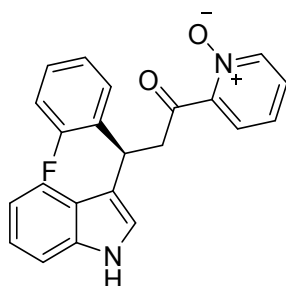

**(S)-2-(3-(2-fluorophenyl)-3-(1H-indol-3-yl)propanoyl)pyridine 1-oxide (4h)**

The title compound was prepared according to the general working procedure and purified by column chromatography to give the product as a white solid in 89% yield.  $[\alpha]_D^{25} = -13.3$  ( $c = 1.0$ , THF, 93% ee). HPLC on Chiralpak AD-H column, hexane/2-propanol = 80:20, flow rate 1.0 mL/min, 254 nm;  $t_R = 25.86$  min (major) and 35.89 min (minor);  $^1\text{H NMR}$  (400 MHz,  $\text{CDCl}_3$ )  $\delta$  8.22 (s, 1H), 8.06-8.05 (d,  $J = 6.4$  Hz, 1H), 7.44-7.42 (d,  $J = 7.9$  Hz, 1H), 7.20-7.13 (m, 4H), 7.05-7.01 (m, 4H), 6.95-6.85 (m, 3H), 5.19 (t,  $J = 7.6$  Hz, 1H), 4.17-4.10 (dd,  $J = 17.0, 7.6$  Hz, 1H), 3.89-3.83 (dd,  $J = 17.0, 7.8$  Hz, 1H).  $^{13}\text{C NMR}$  (100 MHz,  $\text{CDCl}_3$ )  $\delta$  196.4, 161.7-159.3 (d,  $J = 244.1$  Hz), 146.8, 140.2, 136.4, 130.8-130.6 (d,  $J = 13.9$  Hz), 129.5-129.4 (d,  $J = 4.2$  Hz), 128.0-127.9 (d,  $J = 7.6$  Hz), 127.7, 126.6, 125.8, 124.2-124.1 (d,  $J = 3.3$  Hz), 122.1, 121.9, 119.4, 119.2, 117.6, 115.5, 115.3, 111.2, 47.7, 31.2;  $^{19}\text{F NMR}$  (376 MHz,  $\text{CDCl}_3$ )  $\delta$  -118.6.

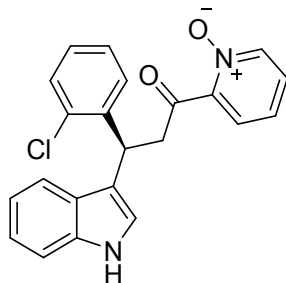

**(S)-2-(3-(2-chlorophenyl)-3-(1H-indol-3-yl)propanoyl)pyridine 1-oxide (4i)**

The title compound was prepared according to the general working procedure and purified by column chromatography to give the product as a white solid in 90% yield.  $[\alpha]_D^{25} = -73.7$  ( $c = 1.0$ , THF, 90% ee). HPLC on Chiralpak AD-H column, hexane/2-propanol = 80:20, flow rate 1.0 mL/min, 254 nm;  $t_R = 23.73$  min (major) and 30.57 min (minor);  $^1\text{H NMR}$  (400 MHz,  $\text{CDCl}_3$ )  $\delta$  8.27 (s, 1H), 8.15-8.12 (m, 1H), 7.49-7.47 (d,  $J = 7.9$  Hz, 1H), 7.35-7.16 (m, 5H), 7.15-6.95 (m, 6H), 5.46 (t,  $J = 7.6$  Hz, 1H), 4.27-4.21 (dd,  $J = 17.0, 8.3$  Hz, 1H), 3.83-3.77 (dd,  $J = 17.0, 6.9$  Hz, 1H).  $^{13}\text{C NMR}$  (100 MHz,  $\text{CDCl}_3$ )  $\delta$  196.3, 146.9, 141.1, 140.2, 136.5, 133.5, 129.5, 129.3, 127.7, 127.6, 127.0, 126.7, 126.6, 125.9, 122.3, 122.1, 119.5, 117.6, 111.2, 47.8, 34.6.

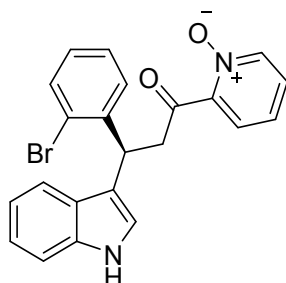

**(S)-2-(3-(2-bromophenyl)-3-(1H-indol-3-yl)propanoyl)pyridine 1-oxide (4j)**

The title compound was prepared according to the general working procedure and purified by column chromatography to give the product as a white solid in 94% yield.  $[\alpha]_D^{25} = -49.6$  ( $c = 1.0$ , THF, 92%

ee). HPLC on Chiralpak OD-H column, hexane/2-propanol = 80:20, flow rate 1.0 mL/min, 254 nm;  $t_R$  = 24.74 min (major) and 31.36 min (minor);  $^1\text{H}$  NMR (400 MHz,  $\text{CDCl}_3$ )  $\delta$  8.40 (s, 1H), 8.12-8.11 (d,  $J$  = 4.2 Hz, 1H), 7.51-7.47 (m, 2H), 7.25-6.94 (m, 10H), 5.43 (t,  $J$  = 7.0 Hz, 1H), 4.26-4.20 (dd,  $J$  = 16.8, 8.4 Hz, 1H), 3.79-3.73 (dd,  $J$  = 16.6, 6.2 Hz, 1H).  $^{13}\text{C}$  NMR (100 MHz,  $\text{CDCl}_3$ )  $\delta$  196.2, 142.8, 136.6, 132.9, 129.5, 128.0, 127.6, 126.7, 126.5, 124.4, 122.4, 122.1, 119.6, 119.4, 117.5, 111.2, 48.0, 37.5.

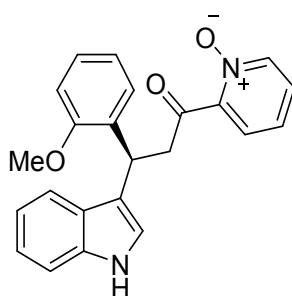

#### **(S)-2-(3-(1H-indol-3-yl)-3-(2-methoxyphenyl)propanoyl)pyridine 1-oxide (4k)**

The title compound was prepared according to the general working procedure and purified by column chromatography to give the product as a white solid in 91% yield.  $[\alpha]_D^{25}$  = 16.6 ( $c$  = 1.0, THF, 84% ee). HPLC on Chiralpak AD-H column, hexane/2-propanol = 80:20, flow rate 1.0 mL/min, 254 nm;  $t_R$  = 27.7 min (minor) and 38.5 min (major);  $^1\text{H}$  NMR (400 MHz,  $\text{CDCl}_3$ )  $\delta$  8.30 (s, 1H), 8.10-8.09 (d,  $J$  = 6.4, 1H), 7.51-7.49 (d,  $J$  = 7.9 Hz, 1H), 7.25-6.94 (m, 9H), 6.80-6.72 (m, 2H), 5.35 (t,  $J$  = 7.7 Hz, 1H), 4.18-4.12 (dd,  $J$  = 8.3, 16.4 Hz, 1H), 3.85-3.70 (dd,  $J$  = 7.3, 16.4 Hz, 1H), 3.76 (s, 3H);  $^{13}\text{C}$  NMR (100 MHz,  $\text{CDCl}_3$ )  $\delta$  197.5, 156.7, 147.3, 140.0, 136.5, 131.9, 128.6, 127.4, 127.3, 127.0, 126.3, 125.6, 122.1, 121.9, 120.6, 119.6, 119.2, 118.4, 111.0, 110.5, 55.4, 47.7, 31.4; HRMS (ESI)  $m/z$  calcd for  $\text{C}_{23}\text{H}_{20}\text{N}_2\text{NaO}_3$   $[\text{M}+\text{Na}]^+$  395.1372, found 395.1366.

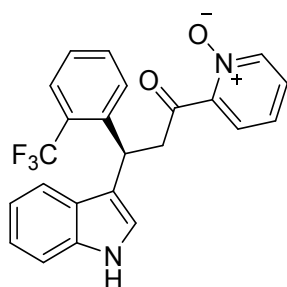

#### **(R)-2-(3-(1H-indol-3-yl)-3-(2-(trifluoromethyl)phenyl)propanoyl)pyridine 1-oxide (4l)**

The title compound was prepared according to the general working procedure and purified by column chromatography to give the product as a white solid in 93% yield.  $[\alpha]_D^{25}$  = 17.3 ( $c$  = 1.0, THF, 90% ee). HPLC on Chiralpak OD-H column, hexane/2-propanol = 80:20, flow rate 1.0 mL/min, 254 nm;  $t_R$  = 21.11 min (major) and 29.88 min (minor);  $^1\text{H}$  NMR (400 MHz,  $\text{CDCl}_3$ )  $\delta$  8.28 (s, 1H), 8.16-8.14 (d,  $J$  = 6.4 Hz, 1H), 7.65-7.62 (d,  $J$  = 7.6 Hz, 1H), 7.41-6.94 (m, 11 H), 5.46-5.42 (dd,  $J$  = 4.4, 9.9 Hz, 1H), 4.45-4.38 (dd,  $J$  = 10, 17.8 Hz, 1H), 3.55-3.48 (dd,  $J$  = 4.5, 17.8 Hz, 1H);  $^{13}\text{C}$  NMR (100 MHz,  $\text{CDCl}_3$ )

$\delta$  195.5, 146.8, 143.1, 140.3, 136.7, 132.0, 129.9, 128.9-120.7 (q,  $J = 272.4$  Hz), 127.9-127.1 (q,  $J = 26.7$  Hz), 127.8, 126.7, 126.6, 126.4, 126.0, 125.9-125.8 (q,  $J = 6.0$  Hz), 122.6, 122.1, 119.5, 119.4, 117.7, 111.1, 49.1, 33.6;  $^{19}\text{F}$  NMR (376 MHz,  $\text{CDCl}_3$ )  $\delta$  -125.2; HRMS (ESI)  $m/z$  calcd for  $\text{C}_{23}\text{H}_{17}\text{F}_3\text{N}_2\text{NaO}_2$   $[\text{M}+\text{Na}]^+$  433.1140, found 433.1138.

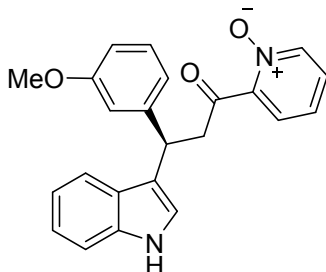

**(R)-2-(3-(1H-indol-3-yl)-3-(3-methoxyphenyl)propanoyl)pyridine 1-oxide (4m)**

The title compound was prepared according to the general working procedure and purified by column chromatography to give the product as a white solid in 92% yield.  $[\alpha]_{\text{D}}^{25} = 13.4$  ( $c = 1.0$ , THF, 90% ee). HPLC on Chiralpak AD-H column, hexane/2-propanol = 80:20, flow rate 1.0 mL/min, 254 nm;  $t_{\text{R}} = 30.98$  min (major) and 33.44 min (minor);  $^1\text{H}$  NMR (400 MHz,  $\text{CDCl}_3$ )  $\delta$  8.17 (s, 1H), 8.15-8.12 (d,  $J = 6.4$ , 1H), 7.47-7.44 (d,  $J = 7.9$  Hz, 1H), 7.29-6.85 (m, 10H), 6.69-6.65 (dd,  $J = 2.0, 8.1$  Hz, 1H), 4.91 (t,  $J = 7.7$  Hz, 1H), 4.11-4.04 (dd,  $J = 7.6, 16.6$  Hz, 1H), 3.98-3.91 (dd,  $J = 8.0$  Hz, 16.6, 1H), 3.70 (s, 3H);  $^{13}\text{C}$  NMR (100 MHz,  $\text{CDCl}_3$ )  $\delta$  197.1, 159.6, 147.1, 145.5, 140.1, 136.5, 129.3, 127.5, 126.7, 126.6, 125.6, 122.1, 121.6, 120.4, 119.43, 119.38, 118.6, 113.8, 111.6, 111.1, 55.1, 49.0, 38.6; HRMS (ESI)  $m/z$  calcd for  $\text{C}_{23}\text{H}_{20}\text{N}_2\text{NaO}_3$   $[\text{M}+\text{Na}]^+$  395.1372, found 395.1367.

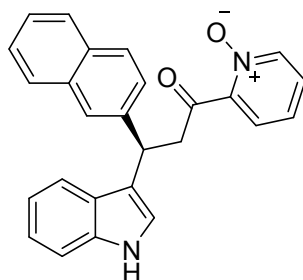

**(R)-2-(3-(1H-indol-3-yl)-3-(naphthalen-2-yl)propanoyl)pyridine 1-oxide (4n)**

The title compound was prepared according to the general working procedure and purified by column chromatography to give the product as a white solid in 95% yield.  $[\alpha]_{\text{D}}^{25} = -36.4$  ( $c = 1.0$ , THF, 97% ee). HPLC on Chiralpak AD-H column, hexane/2-propanol = 80:20, flow rate 1.0 mL/min, 254 nm;  $t_{\text{R}} = 40.64$  min (minor) and 46.06 min (major);  $^1\text{H}$  NMR (400 MHz,  $\text{CDCl}_3$ )  $\delta$  8.21-8.01 (m, 2H), 7.80-7.61 (m, 4H), 7.48-7.31 (m, 4H), 7.30-7.19 (m, 2H), 7.12-6.88 (m, 5H), 5.10 (t,  $J = 7.7$  Hz, 1H), 4.20-3.89 (m, 2H);  $^{13}\text{C}$  NMR (100 MHz,  $\text{CDCl}_3$ )  $\delta$  197.0, 147.0, 141.3, 140.1, 136.5, 133.4, 132.3, 128.1, 127.8, 127.5, 126.7, 126.62, 126.57, 126.1, 125.9, 125.6, 125.4, 122.1, 121.7, 119.5, 119.4, 118.7, 111.0, 48.9, 38.7.

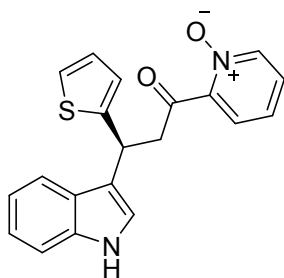

**(S)-2-(3-(1H-indol-3-yl)-3-(thiophen-2-yl)propanoyl)pyridine 1-oxide (4o)**

The title compound was prepared according to the general working procedure and purified by column chromatography to give the product as a white solid in 88% yield.  $[\alpha]_D^{25} = 19.3$  ( $c = 1.0$ , THF, 92% ee). HPLC on Chiralpak AD-H column, hexane/2-propanol = 80:20, flow rate 1.0 mL/min, 254 nm;  $t_R = 29.11$  min (major) and 31.26 min (minor);  $^1\text{H NMR}$  (400 MHz,  $\text{CDCl}_3$ )  $\delta$  8.20 (s, 1H), 8.06-8.04 (d,  $J = 6.2$ , 1H), 7.47-7.44 (d,  $J = 7.9$  Hz, 1H), 7.22-6.75 (m, 10H), 5.17 (t,  $J = 7.5$ , 1H), 4.10-4.03 (dd,  $J = 7.3$ , 16.6 Hz, 1H), 3.99-3.92 (dd,  $J = 7.9$ , 16.6 Hz, 1H);  $^{13}\text{C NMR}$  (100 MHz,  $\text{CDCl}_3$ )  $\delta$  196.5, 148.4, 146.9, 140.1, 136.4, 127.7, 126.6, 126.5, 126.3, 125.7, 124.3, 123.6, 122.2, 121.8, 119.5, 119.3, 118.5, 111.2, 50.0, 33.9; HRMS (ESI)  $m/z$  calcd for  $\text{C}_{20}\text{H}_{16}\text{N}_2\text{NaO}_2\text{S}$   $[\text{M}+\text{Na}]^+$  371.0830, found 371.0827.

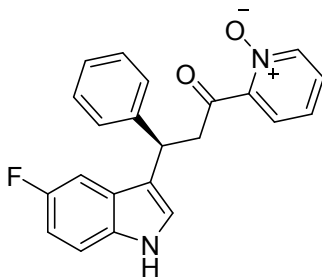

**(R)-2-(3-(5-fluoro-1H-indol-3-yl)-3-phenylpropanoyl)pyridine 1-oxide (4p)**

The title compound was prepared according to the general working procedure and purified by column chromatography to give the product as a white solid in 95% yield.  $[\alpha]_D^{25} = 20.1$  ( $c = 1.0$ , THF, 96% ee). HPLC on Chiralpak AD-H column, hexane/2-propanol = 80:20, flow rate 1.0 mL/min, 254 nm;  $t_R = 20.78$  min (major) and 23.09 min (minor);  $^1\text{H NMR}$  (400 MHz,  $\text{DMSO}-d_6$ )  $\delta$  10.98 (s, 1H), 8.33-8.31 (d,  $J = 6.4$  Hz, 1H), 7.55-7.50 (m, 1H), 7.38-7.00 (m, 10H), 6.89-6.83 (m, 1H), 4.76-4.71 (t,  $J = 7.8$  Hz, 1H), 4.05-3.98 (dd,  $J = 8.0$ , 16.8 Hz, 1H), 3.81-3.74 (dd,  $J = 7.4$ , 16.9 Hz, 1H);  $^{13}\text{C NMR}$  (100 MHz,  $\text{DMSO}-d_6$ )  $\delta$  197.6, 158.1-155.8 (d,  $J = 229.7$  Hz), 146.8, 144.7, 140.5, 133.5, 128.9, 128.7, 128.1, 126.95-126.85 (d,  $J = 9.6$  Hz), 126.5, 126.30, 126.25, 124.7, 118.1-118.0 (d,  $J = 4.9$  Hz), 112.8-112.7 (d,  $J = 9.8$  Hz), 109.7-109.4 (d,  $J = 26.1$  Hz), 103.8-103.6 (d,  $J = 23.0$  Hz), 48.4, 38.0;  $^{19}\text{F NMR}$  (376 MHz,  $\text{DMSO}-d_6$ )  $\delta$  -124.4.

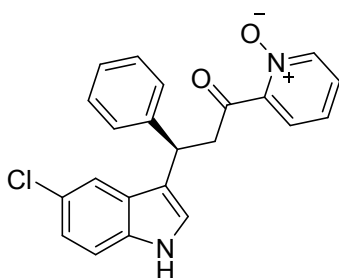

**(R)-2-(3-(5-chloro-1H-indol-3-yl)-3-phenylpropanoyl)pyridine 1-oxide (4q)**

The title compound was prepared according to the general working procedure and purified by column chromatography to give the product as a white solid in 92% yield.  $[\alpha]_{\text{D}}^{25} = 40.0$  ( $c = 1.0$ , THF, 98% ee). HPLC on Chiralpak AD-H column, hexane/2-propanol = 80:20, flow rate 1.0 mL/min, 254 nm;  $t_{\text{R}} = 19.15$  min (major) and 22.02 min (minor);  $^1\text{H NMR}$  (400 MHz,  $\text{DMSO-}d_6$ )  $\delta$  11.09 (s, 1H), 8.33-8.31 (d,  $J = 6.4$  Hz, 1H), 7.55-7.50 (m, 1H), 7.42-6.95 (m, 11H), 4.76-4.71 (t,  $J = 7.8$  Hz, 1H), 4.04-3.98 (dd,  $J = 8.4, 17.0$  Hz, 1H), 3.79-3.73 (dd,  $J = 7.2, 16.8$  Hz, 1H);  $^{13}\text{C NMR}$  (400 MHz,  $\text{DMSO-}d_6$ )  $\delta$  197.6, 146.7, 144.7, 140.6, 135.3, 128.9, 128.7, 128.1, 127.9, 126.6, 126.34, 126.29, 124.5, 123.4, 121.4, 118.2, 117.7, 113.4, 48.5, 37.8.

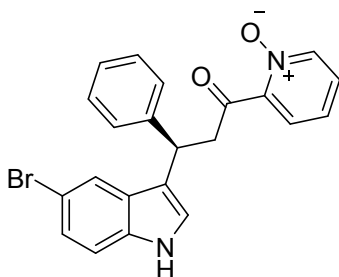

**(R)-2-(3-(5-bromo-1H-indol-3-yl)-3-phenylpropanoyl)pyridine 1-oxide (4r)**

The title compound was prepared according to the general working procedure and purified by column chromatography to give the product as a white solid in 93% yield.  $[\alpha]_{\text{D}}^{25} = 55.4$  ( $c = 1.0$ , THF, 98% ee). HPLC on Chiralpak AD-H column, hexane/2-propanol = 80:20, flow rate 1.0 mL/min, 254 nm;  $t_{\text{R}} = 19.25$  min (major) and 22.64 min (minor);  $^1\text{H NMR}$  (400 MHz,  $\text{DMSO-}d_6$ )  $\delta$  11.1 (s, 1H), 8.34-8.32 (d,  $J = 6.4$  Hz, 1H), 7.60-7.08 (m, 12H), 4.79-4.75 (t,  $J = 7.6$  Hz, 1H), 4.04-3.98 (dd,  $J = 8.2, 17.0$  Hz, 1H), 3.79-3.73 (dd,  $J = 7.2, 16.9$  Hz, 1H);  $^{13}\text{C NMR}$  (100 MHz,  $\text{DMSO-}d_6$ )  $\delta$  197.5, 146.8, 144.7, 140.6, 135.5, 128.9, 128.7, 128.6, 128.1, 126.6, 126.4, 126.3, 124.4, 124.0, 121.2, 117.6, 113.9, 111.4, 48.5, 37.8.

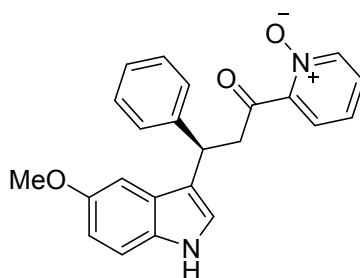

**(R)-2-(3-(5-methoxy-1H-indol-3-yl)-3-phenylpropanoyl)pyridine 1-oxide (4s)**

The title compound was prepared according to the general working procedure and purified by column chromatography to give the product as a white solid in 90% yield.  $[\alpha]_D^{25} = 36.4$  ( $c = 1.0$ , THF, 90% ee). HPLC on Daicel Chiralpak AD-H column, n-hexane/2-propanol = 80:20, flow rate 1.0 mL/min, 254 nm;  $t_R = 27.49$  min (major) and 33.57 min (minor);  $^1\text{H NMR}$  (400 MHz,  $\text{CDCl}_3$ )  $\delta$  8.16-8.11 (m, 2H), 7.35-6.98 (m, 10H), 6.85-6.84 (d,  $J = 2.4$  Hz, 1H), 6.77-6.74 (m, 1H), 4.87 (t,  $J = 7.8$  Hz, 1H), 4.11-4.05 (dd,  $J = 7.6, 16.4$  Hz, 1H), 3.96-3.90 (dd,  $J = 8.0, 16.4$  Hz, 1H), 3.72 (s, 3H);  $^{13}\text{C NMR}$  (100 MHz,  $\text{CDCl}_3$ )  $\delta$  197.2, 153.7, 147.1, 143.8, 140.0, 131.7, 128.4, 127.9, 127.6, 127.1, 126.5, 126.4, 125.7, 122.4, 118.3, 122.2, 111.8, 101.3, 55.8, 49.0, 38.6.

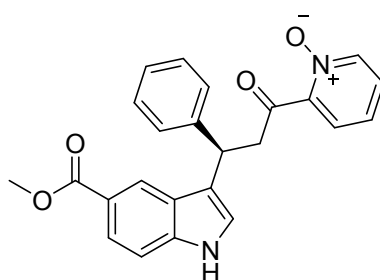

**(R)-2-(3-(5-acetyl-1H-indol-3-yl)-3-phenylpropanoyl)pyridine 1-oxide (4t)**

The title compound was prepared according to the general working procedure and purified by column chromatography to give the product as a white solid in 90% yield.  $[\alpha]_D^{25} = 33.1$  ( $c = 1.0$ , THF, 83% ee). HPLC on Chiralpak AD-H column, hexane/2-propanol = 80:20, flow rate 1.0 mL/min, 254 nm;  $t_R = 22.27$  min (major) and 25.50 min (minor);  $^1\text{H NMR}$  (400 MHz,  $\text{CDCl}_3$ )  $\delta$  8.72 (s, 1H), 8.12 (s, 1H), 8.09-8.07 (d,  $J = 4.8$  Hz, 1H), 7.74-7.71 (dd,  $J = 1.4, 8.6$  Hz, 1H), 7.24-7.01 (m, 10H), 4.91 (t,  $J = 7.6$  Hz, 1H), 4.03-3.96 (dd,  $J = 7.6, 16.9$  Hz, 1H), 3.94-3.87 (dd,  $J = 7.8, 16.6$  Hz, 1H), 3.79 (s, 3H);  $^{13}\text{C NMR}$  (100 MHz,  $\text{CDCl}_3$ )  $\delta$  196.6, 168.2, 146.9, 143.5, 140.2, 139.1, 128.5, 127.8, 127.7, 126.6, 126.5, 126.3, 125.9, 123.5, 123.0, 122.2, 121.4, 120.1, 110.9, 51.9, 49.2, 38.1; HRMS (ESI)  $m/z$  calcd for  $\text{C}_{24}\text{H}_{20}\text{NaN}_2\text{O}_4$   $[\text{M}+\text{Na}]^+$  423.1321, found 423.1315.

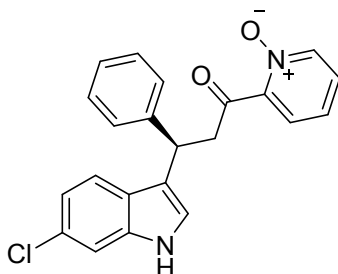

**(R)-2-(3-(6-chloro-1H-indol-3-yl)-3-phenylpropanoyl)pyridine 1-oxide (4u)**

The title compound was prepared according to the general working procedure and purified by column chromatography to give the product as a white solid in 93% yield.  $[\alpha]_D^{25} = 36.5$  ( $c = 1.0$ , THF, 96% ee). HPLC on Chiralpak AD-H column, hexane/2-propanol = 80:20, flow rate 1.0 mL/min, 254 nm;  $t_R$



= 26.41 min (major) and 30.16 min (minor);  $^1\text{H}$  NMR (400 MHz,  $\text{CDCl}_3$ )  $\delta$  8.22 (s, 1H), 8.17-8.15 (d,  $J = 6.4$  Hz, 1H), 7.31-7.08 (m, 11 H), 6.95-6.92 (dd,  $J = 1.8, 8.5$  Hz, 1H), 4.90 (t,  $J = 7.7$  Hz, 1H), 4.12-4.05 (dd,  $J = 7.6, 16.9$  Hz, 1H), 3.95-3.88 (dd,  $J = 7.8, 16.6$  Hz, 1H);  $^{13}\text{C}$  NMR (100 MHz,  $\text{CDCl}_3$ )  $\delta$  196.8, 147.0, 143.5, 140.2, 136.9, 128.5, 128.0, 127.8, 127.7, 126.6, 126.5, 125.8, 125.3, 122.2, 120.4, 120.1, 119.0, 111.0, 49.0, 38.3; HRMS (ESI)  $m/z$  calcd for  $\text{C}_{22}\text{H}_{17}\text{ClN}_2\text{NaO}_2$   $[\text{M}+\text{Na}]^+$  399.0876, found 399.0873.

#### References

1. Y. Gui, Y. Li, J. Sun, Z. Zha, Z. Wang, *J. Org. Chem.* 2018, **83**, 7491-7499.
2. P. Singh, V. Singh, *Org. Lett.* 2008, **10**, 4121-4124.

## 6. Copies of $^1\text{H}$ NMR, $^{19}\text{F}$ NMR and $^{13}\text{C}$ NMR Spectra

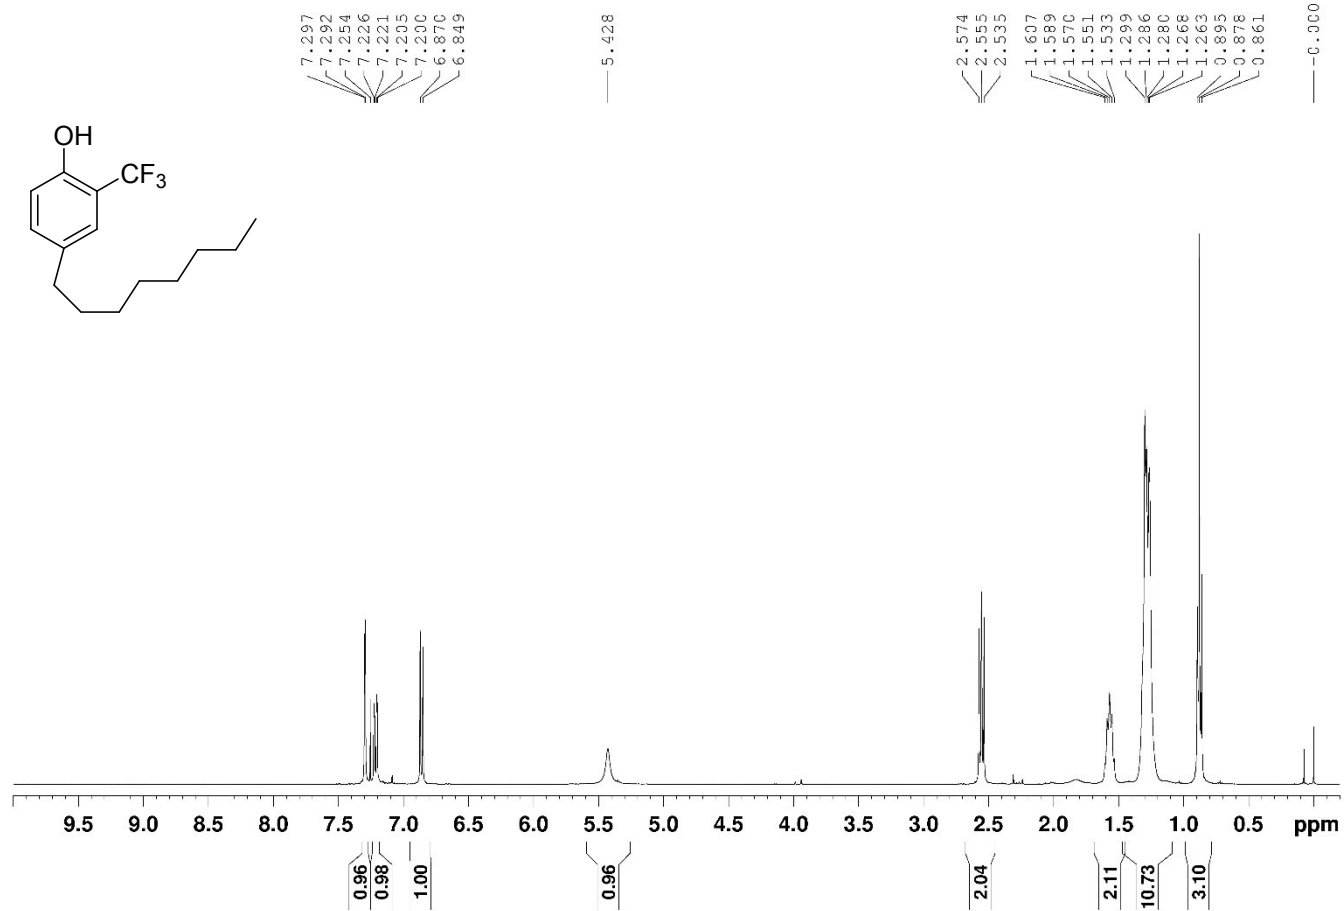

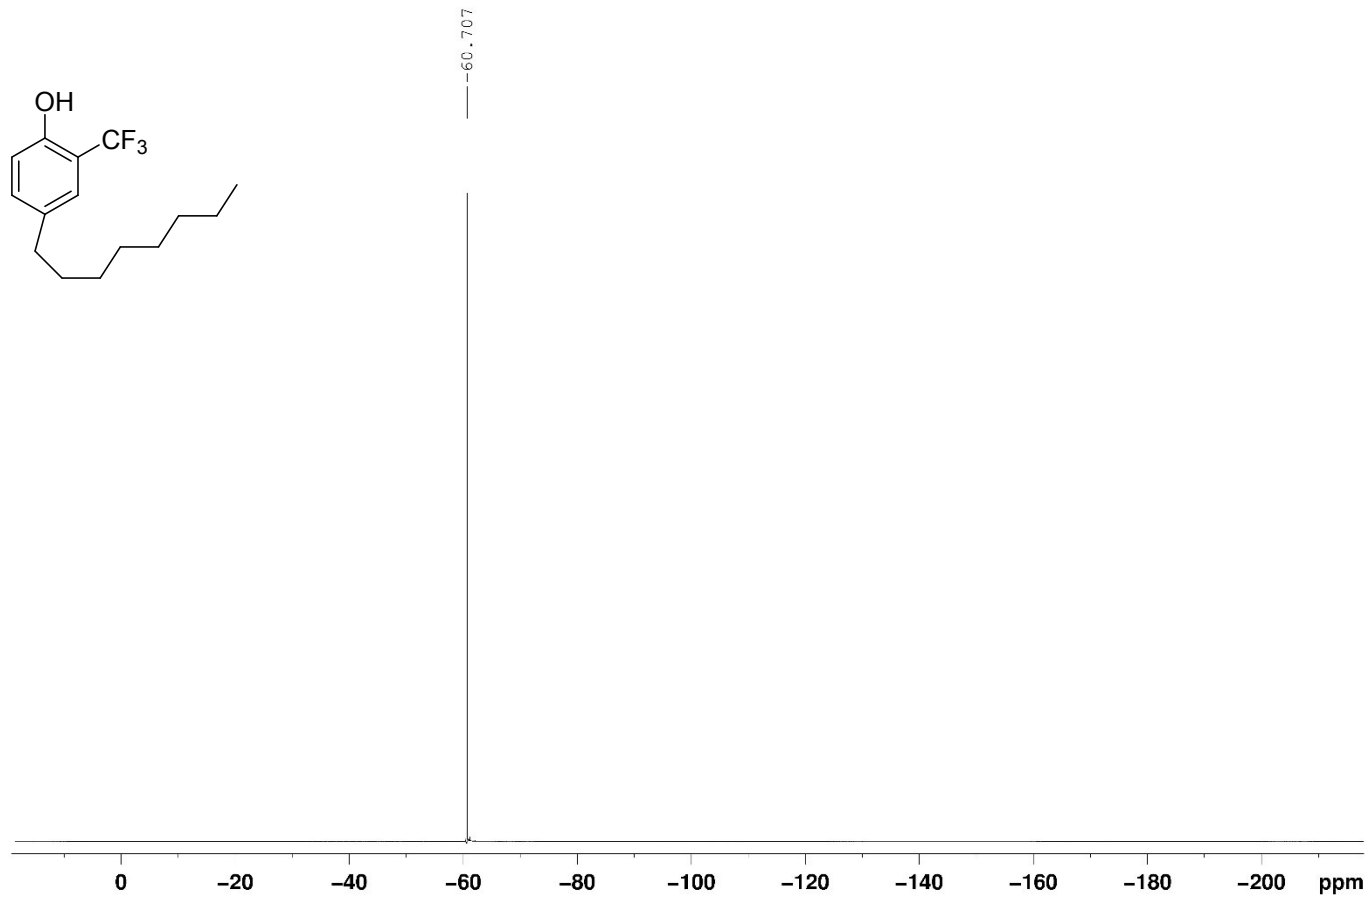

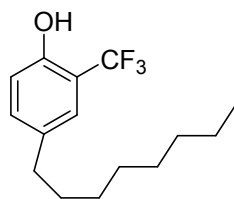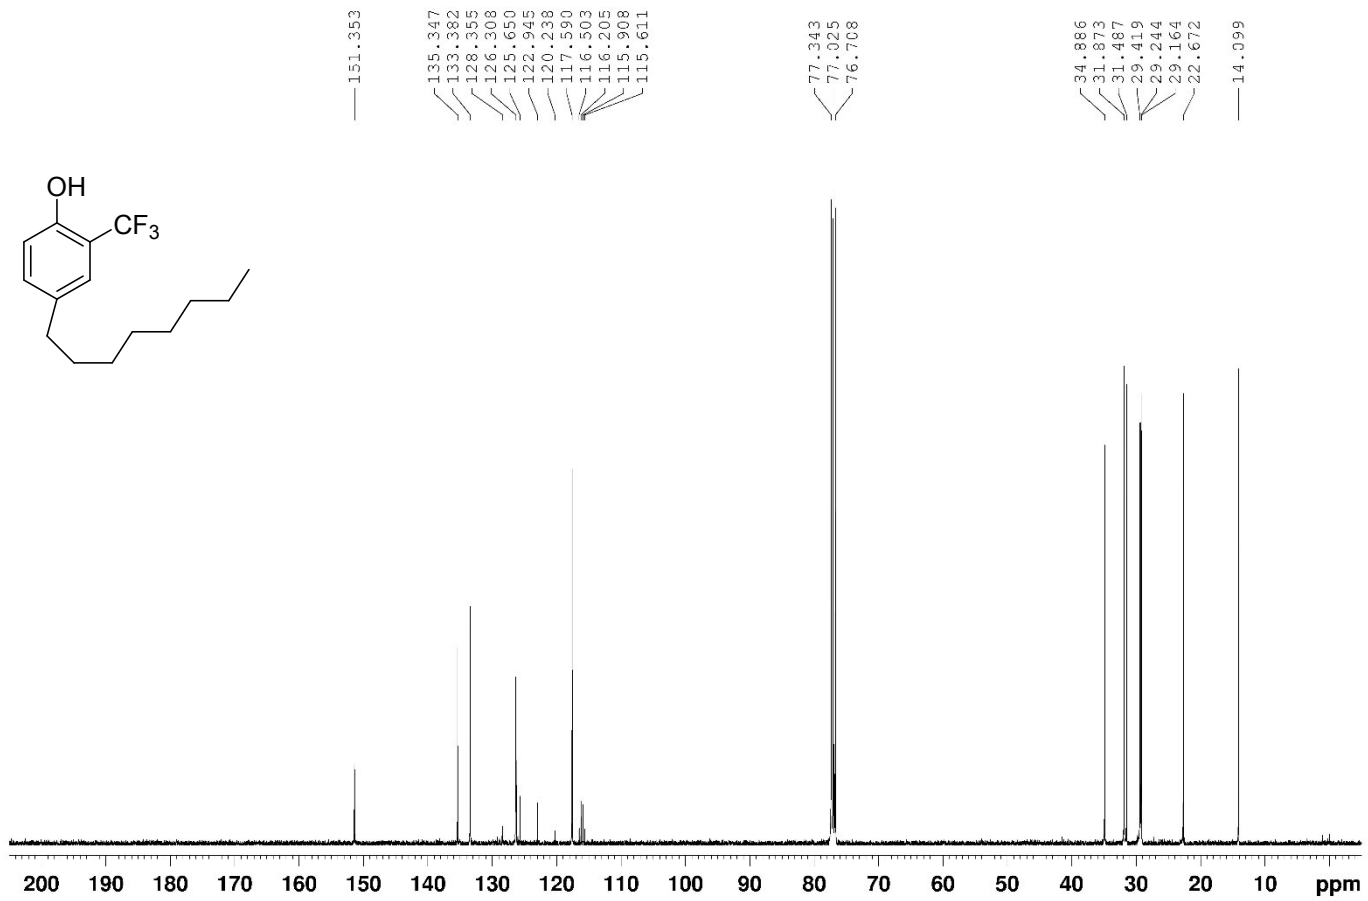

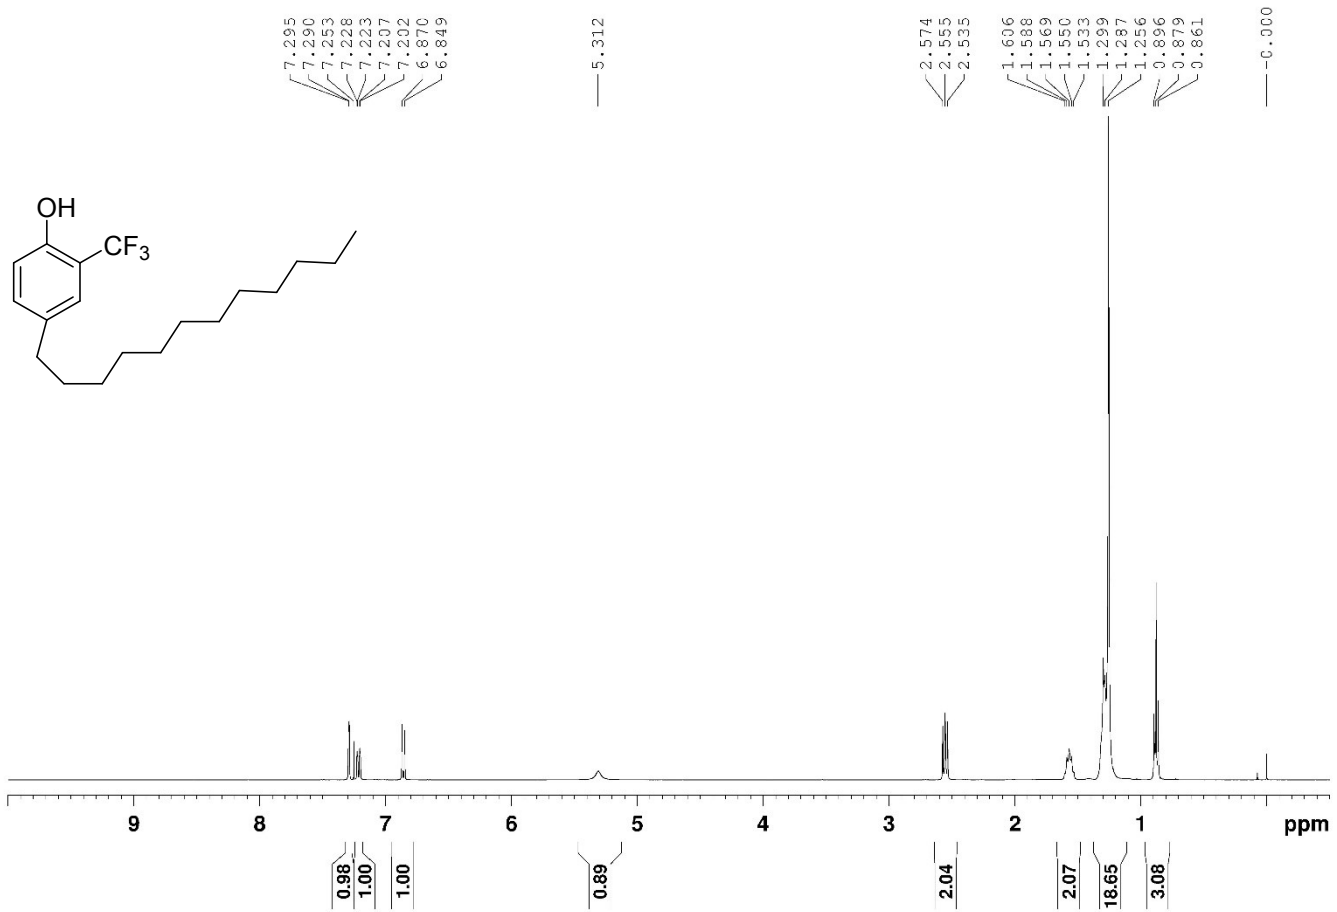

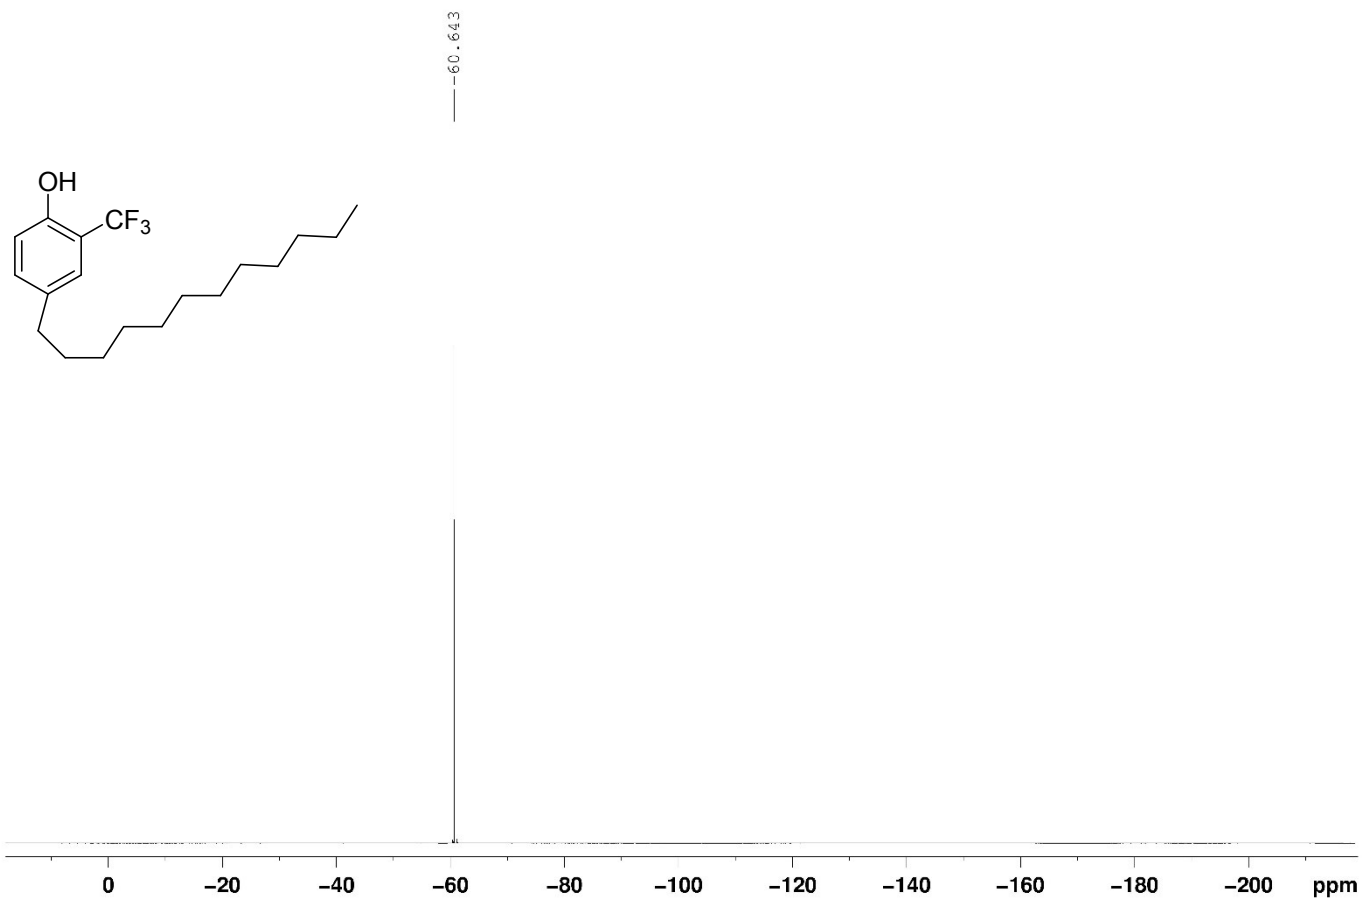

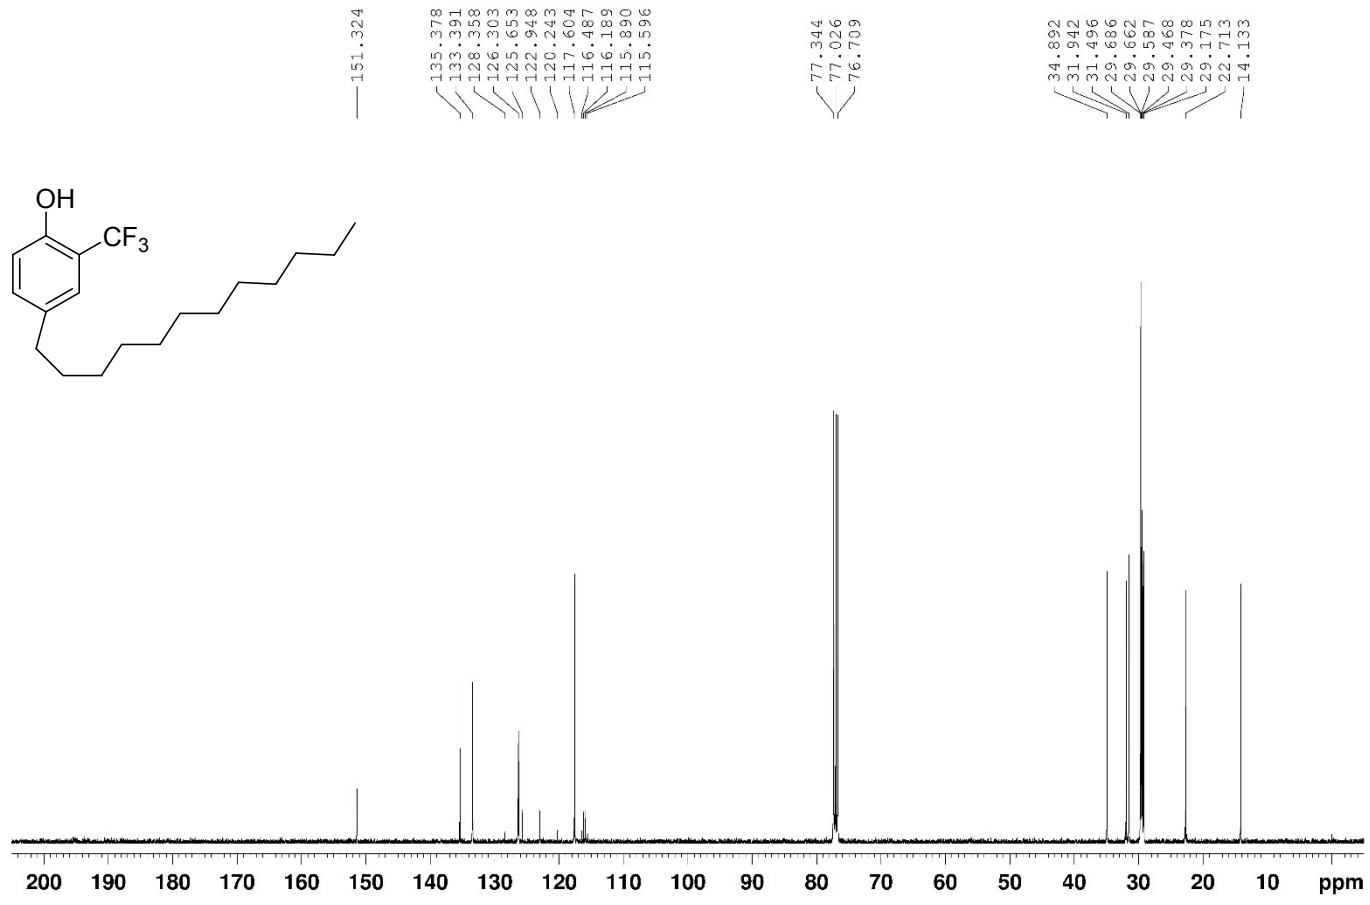

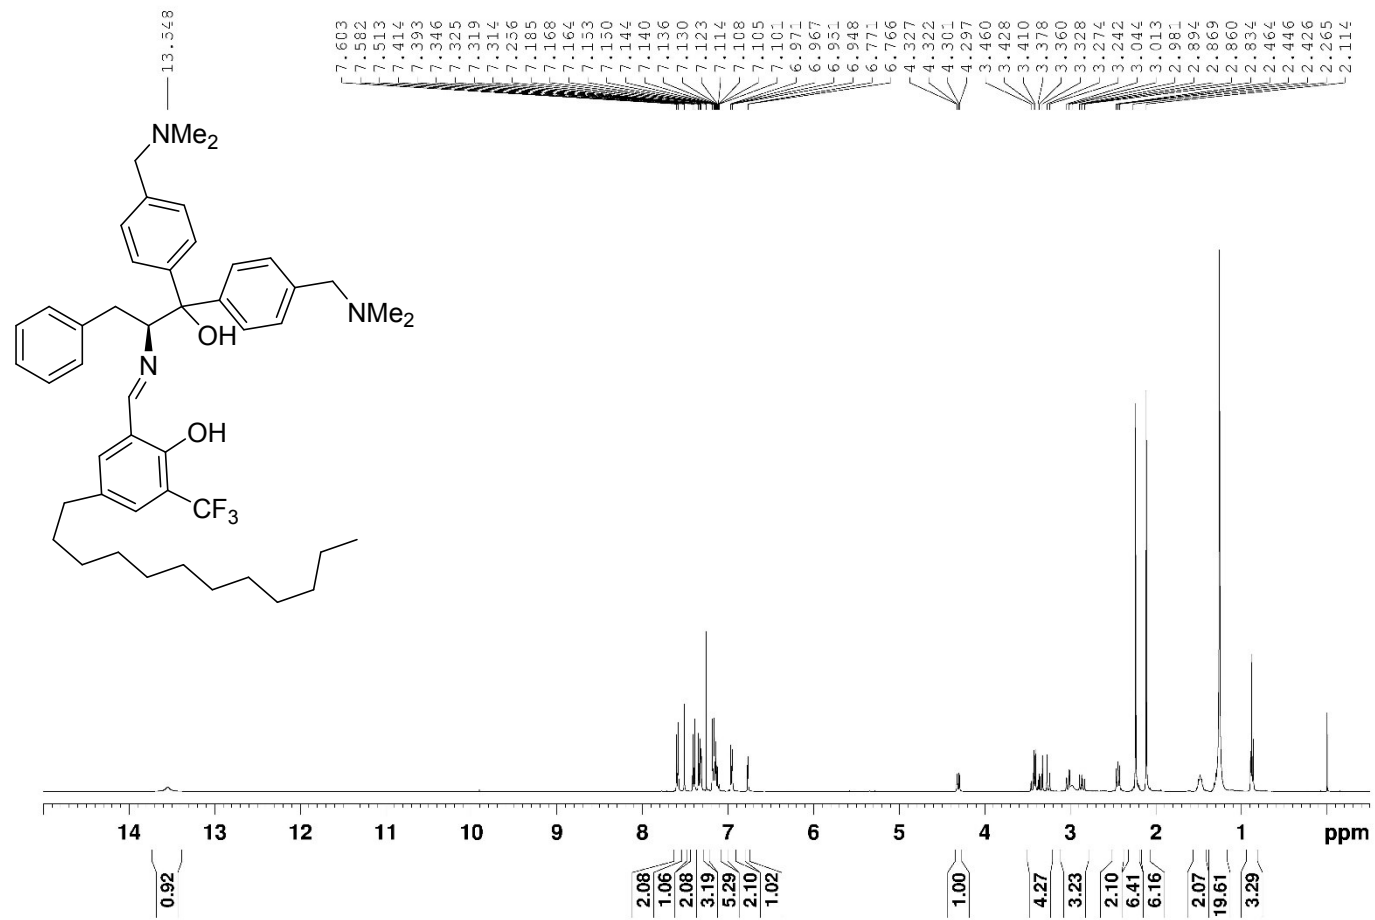



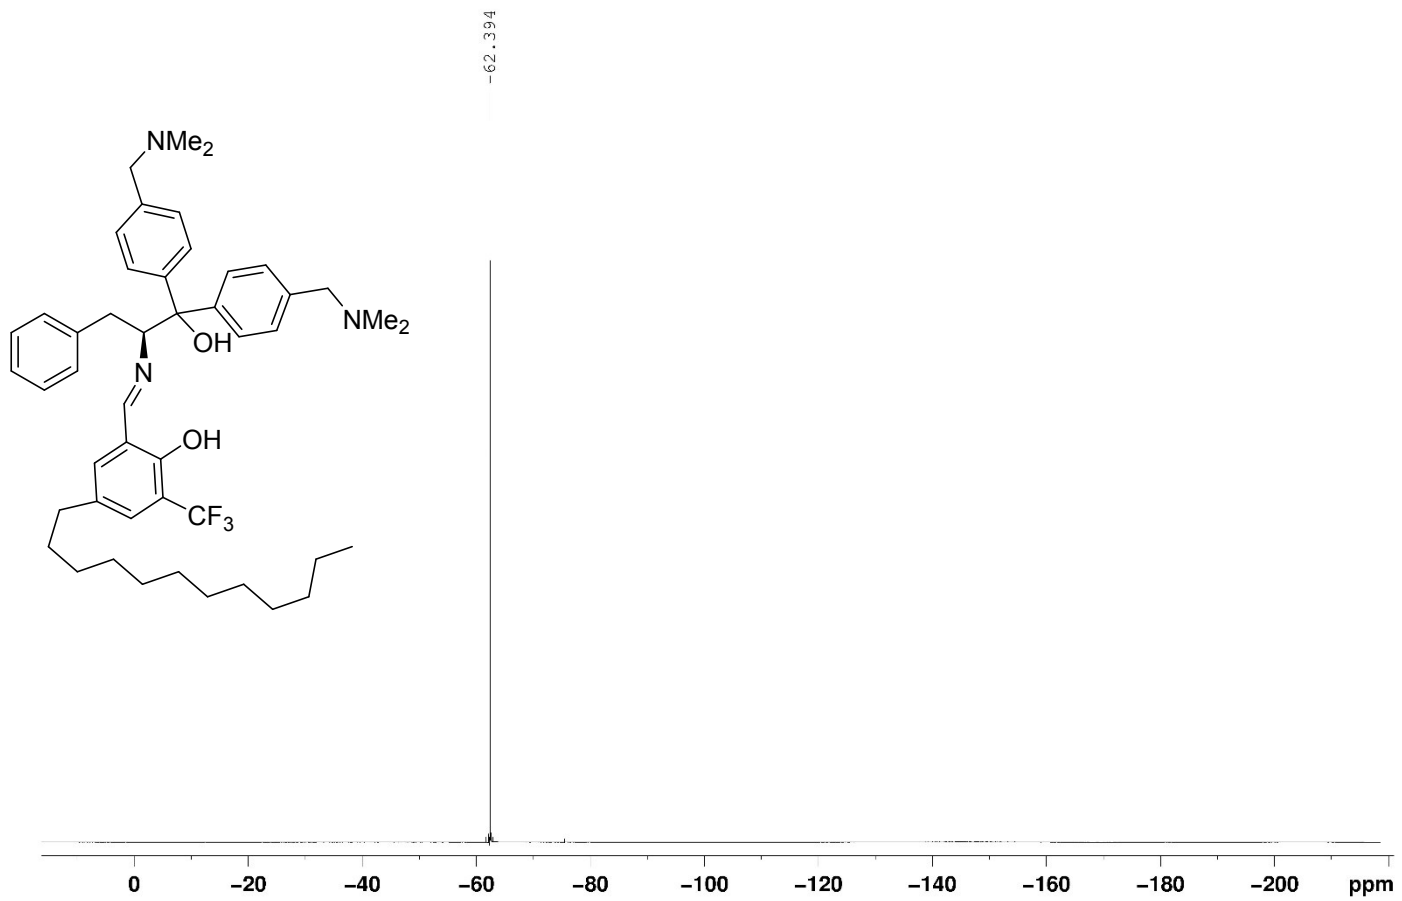

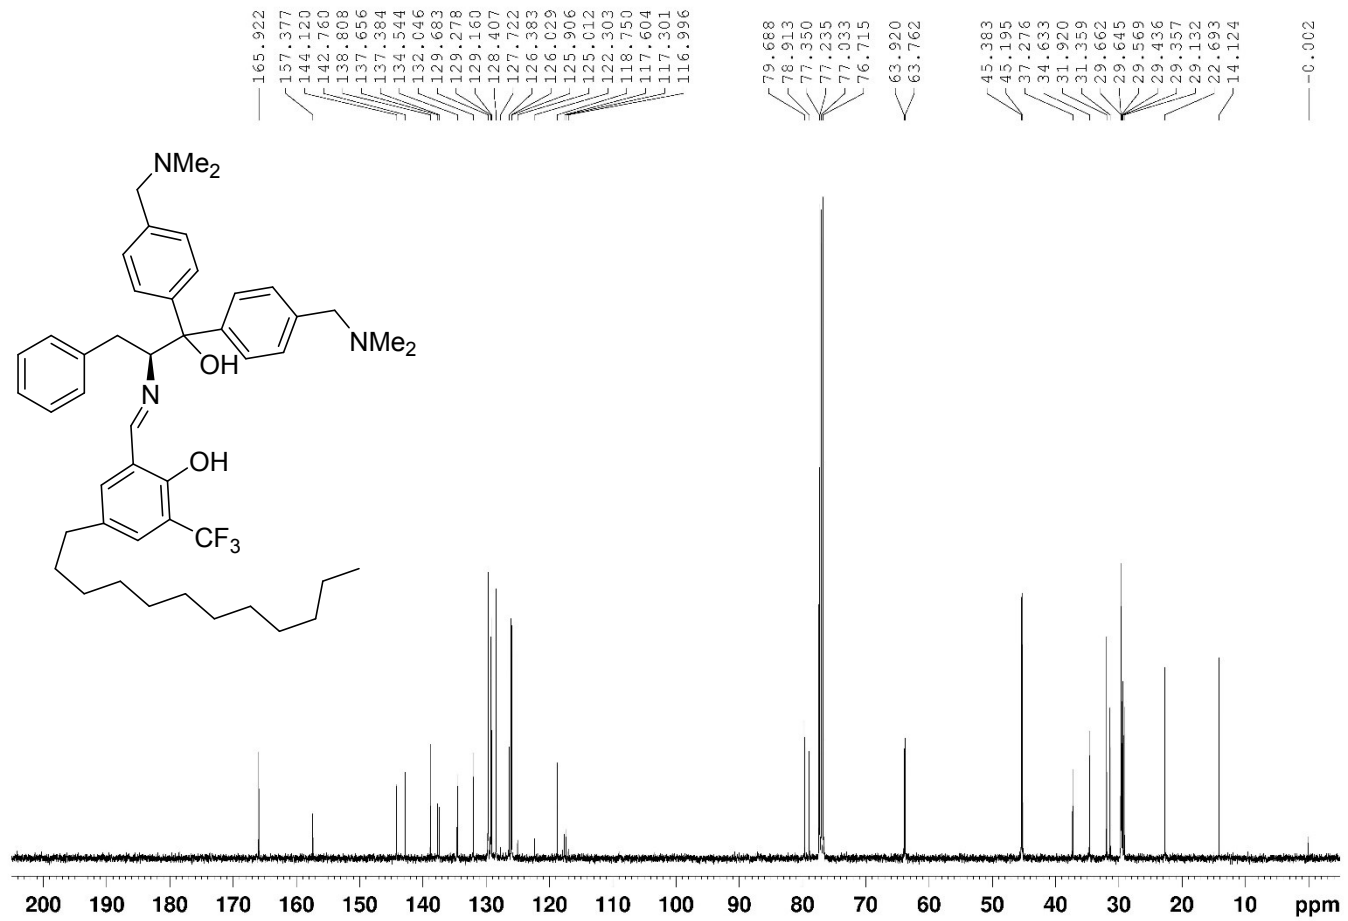

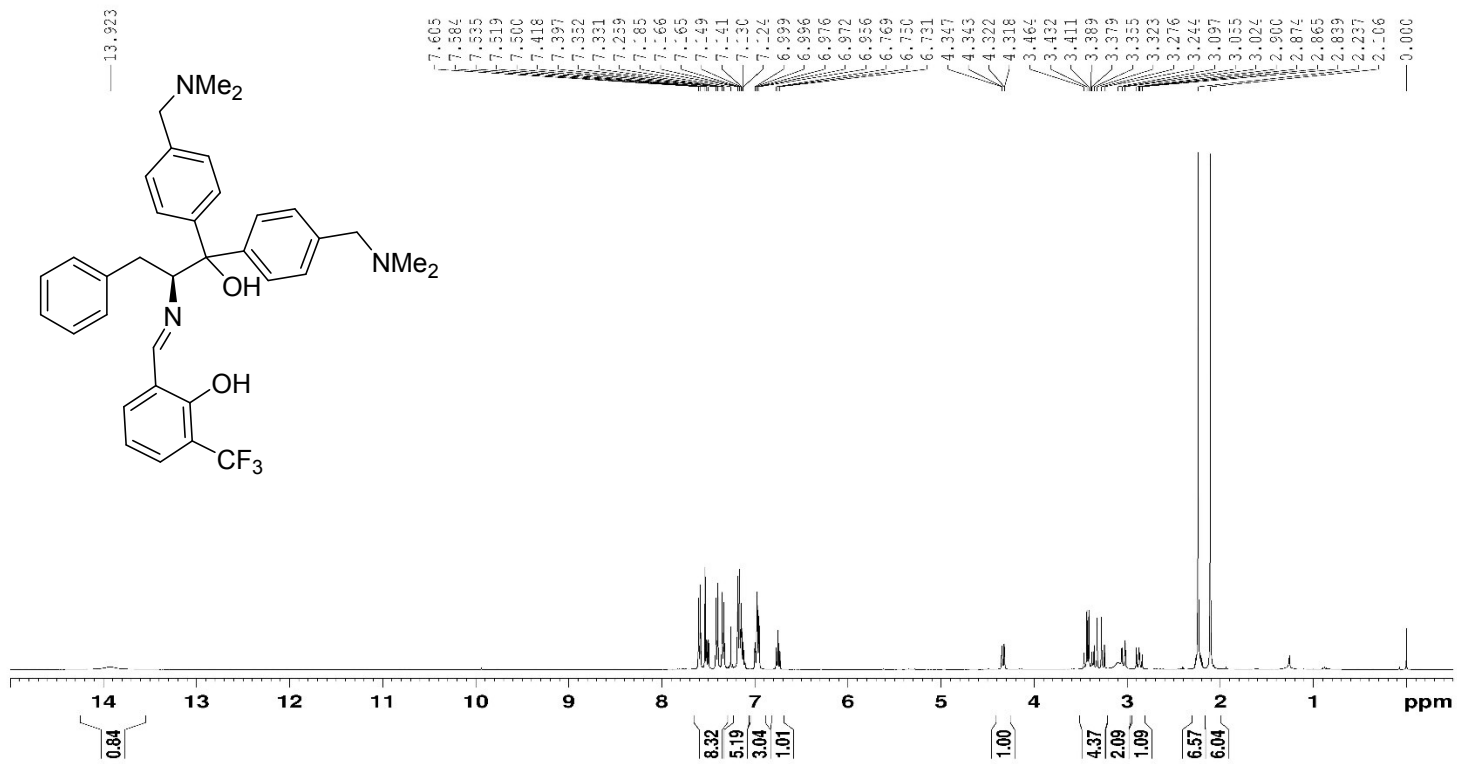

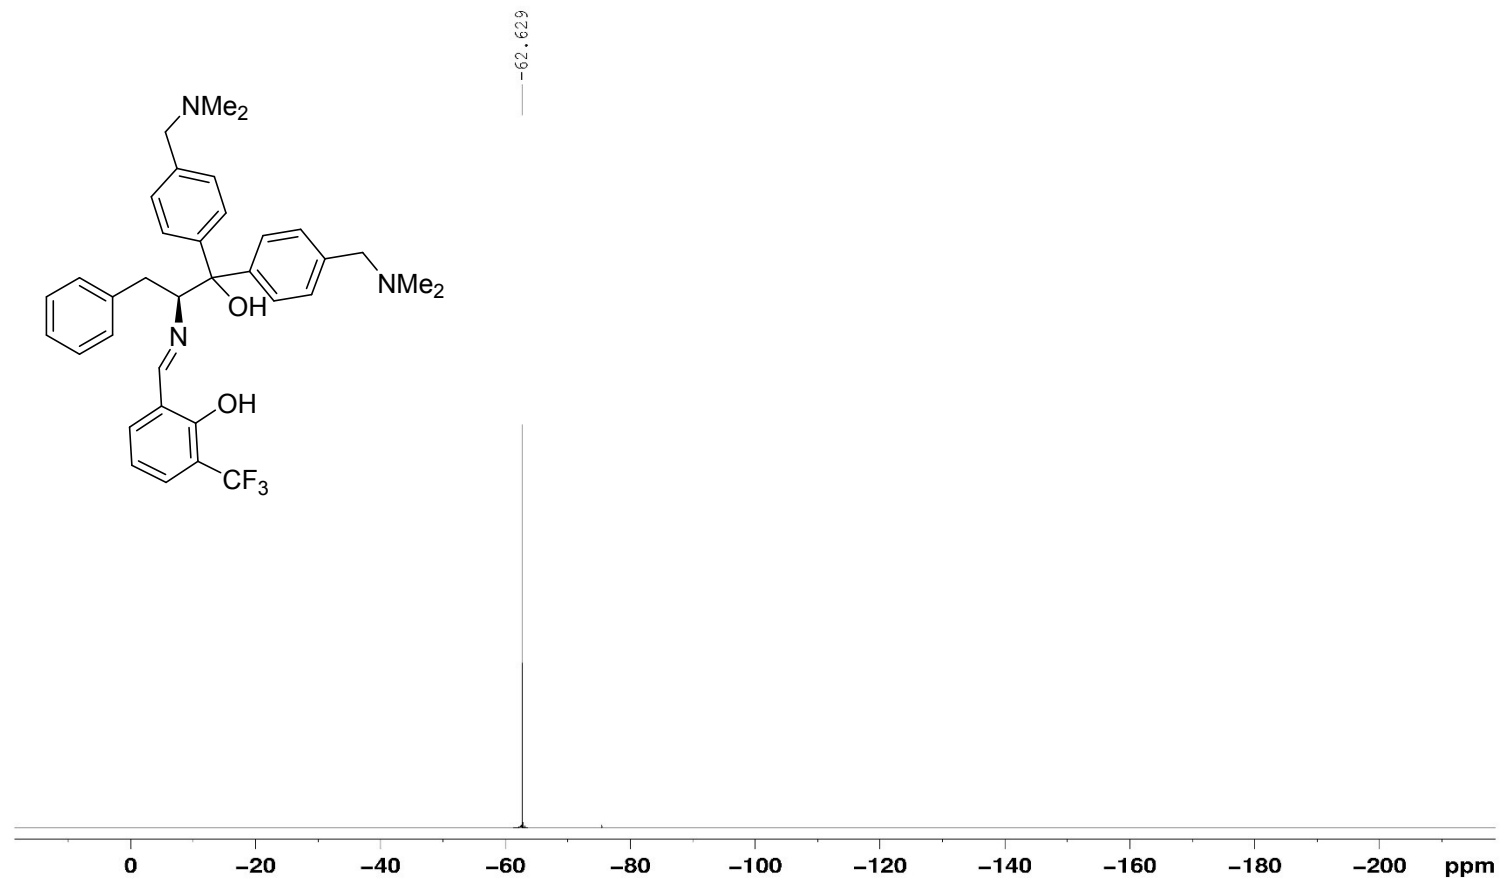

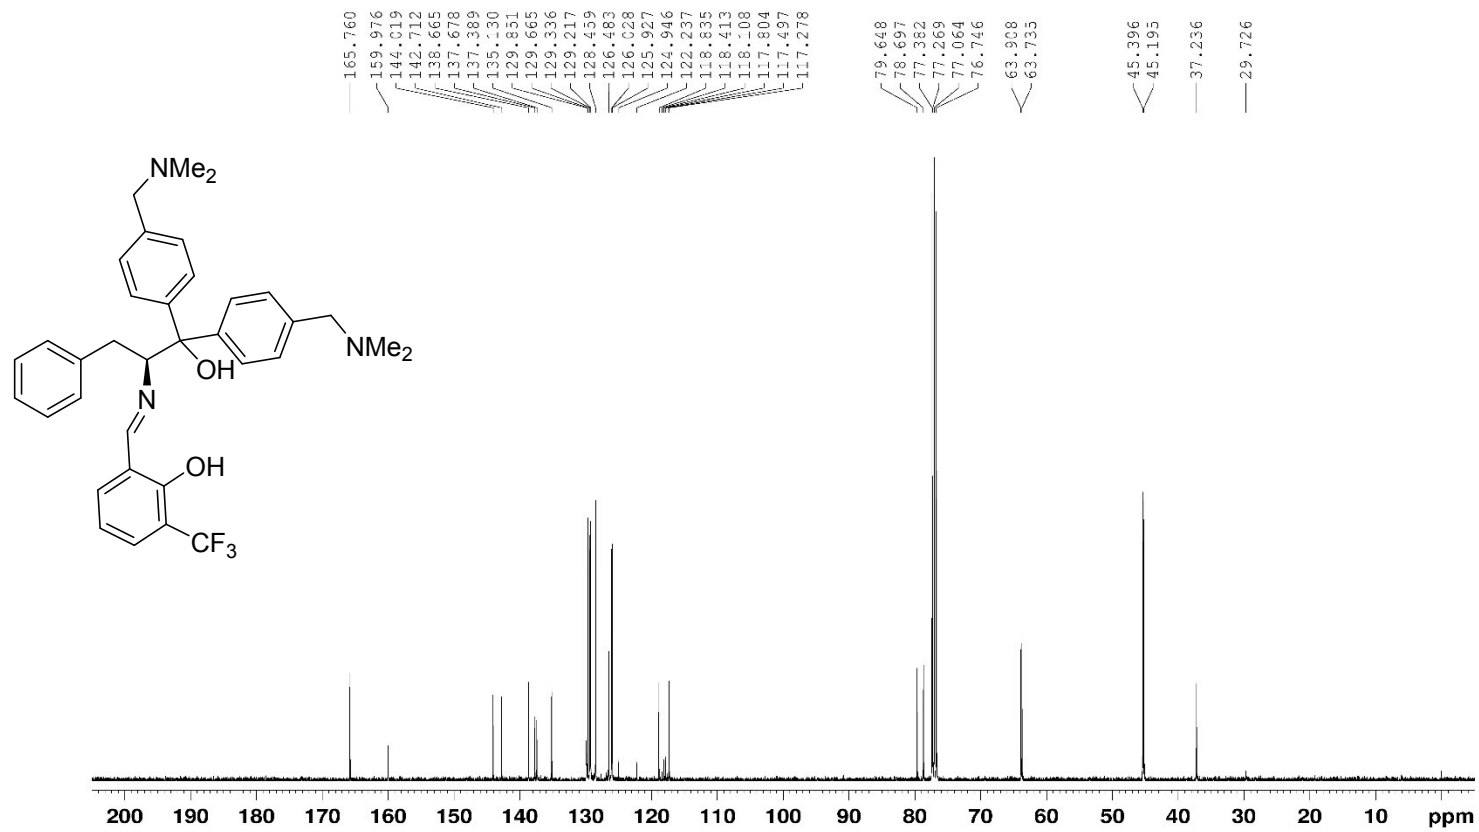

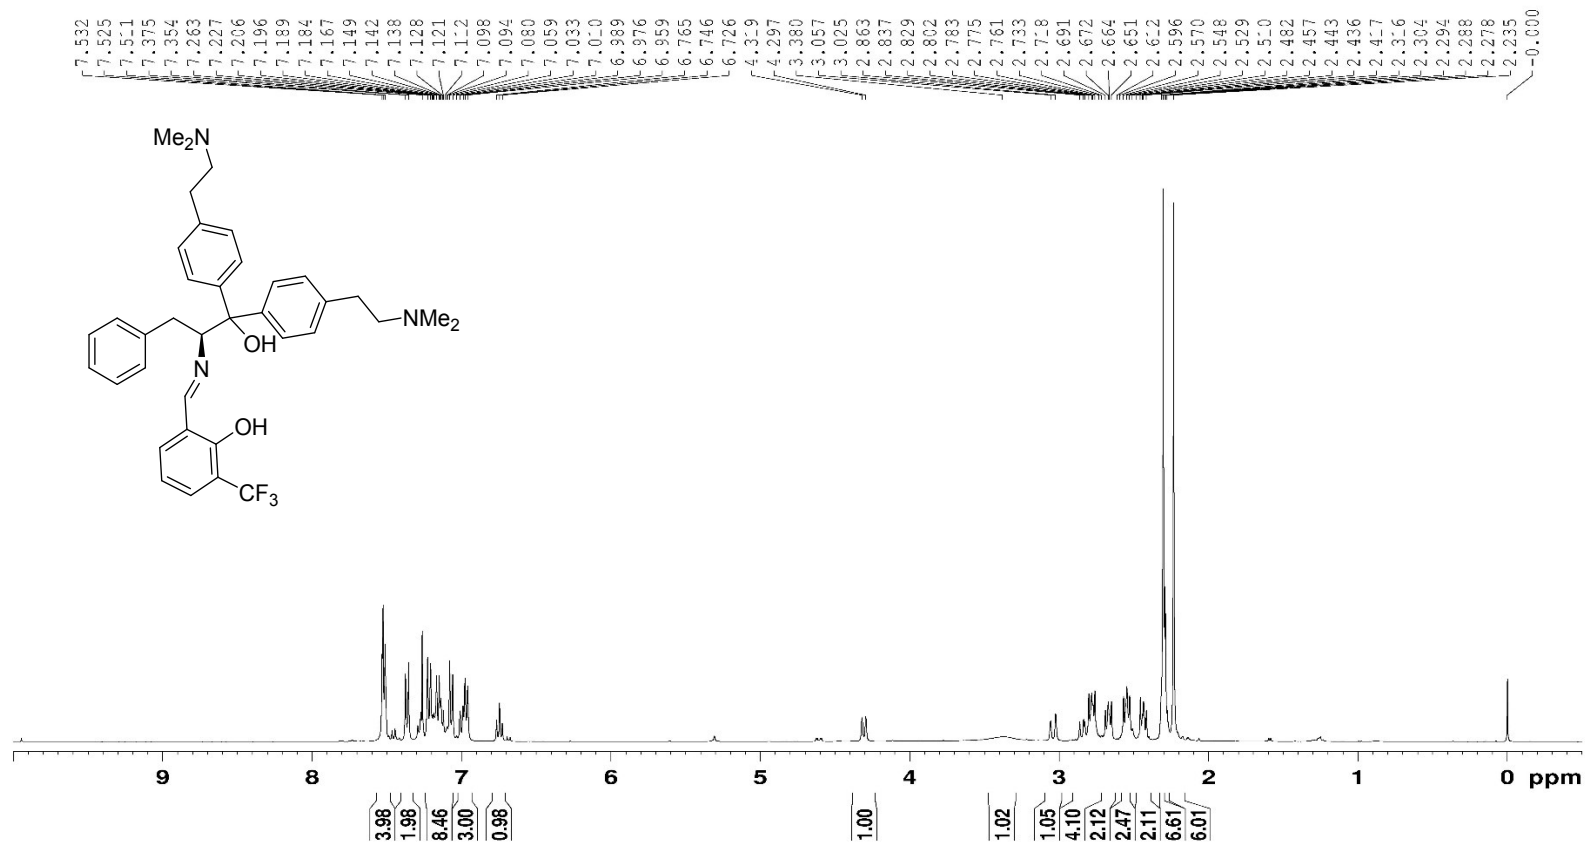

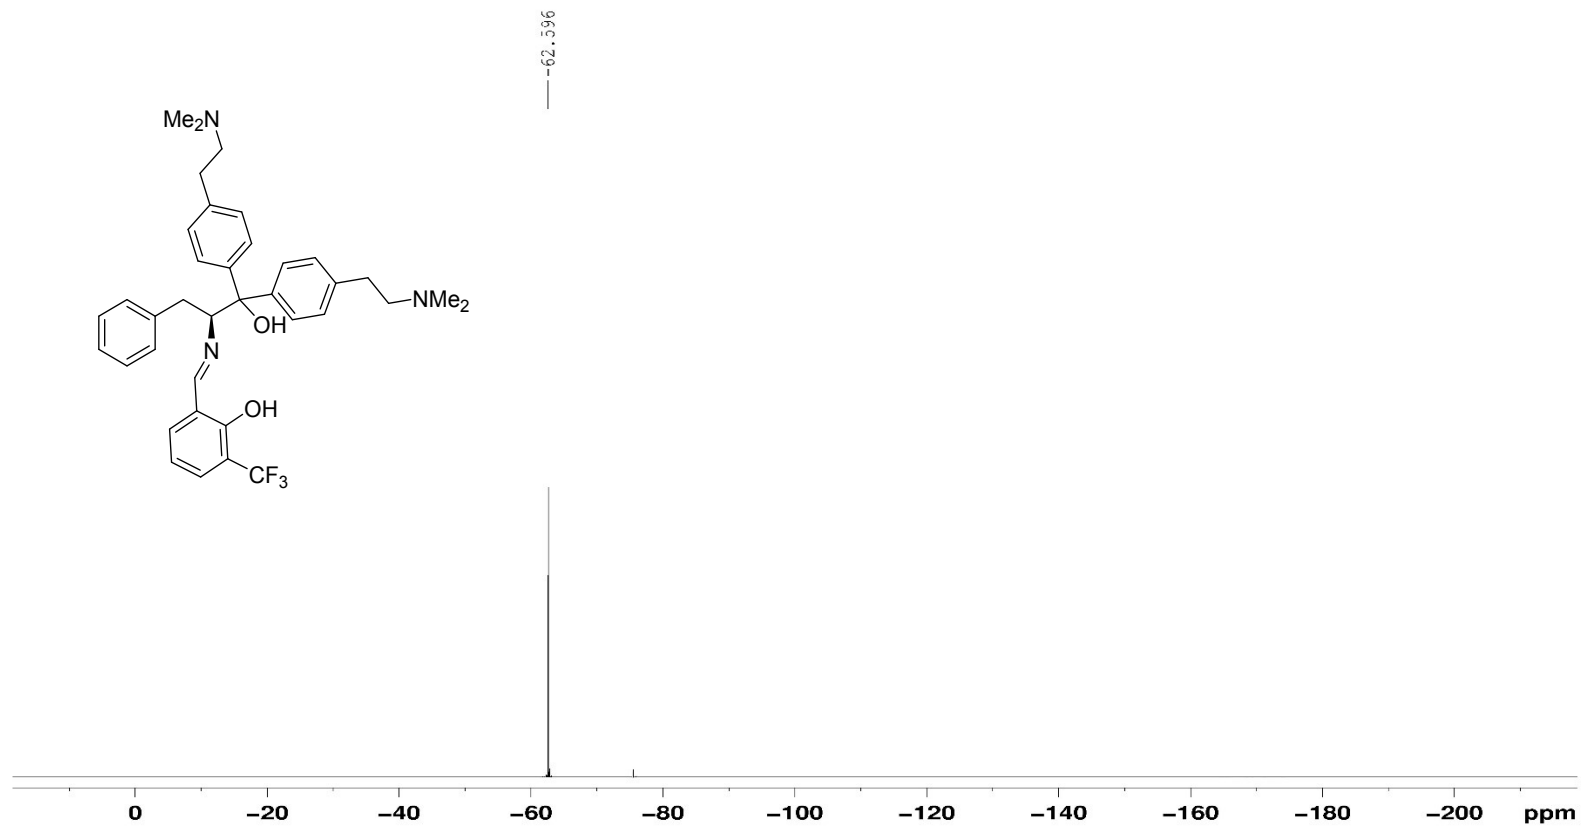

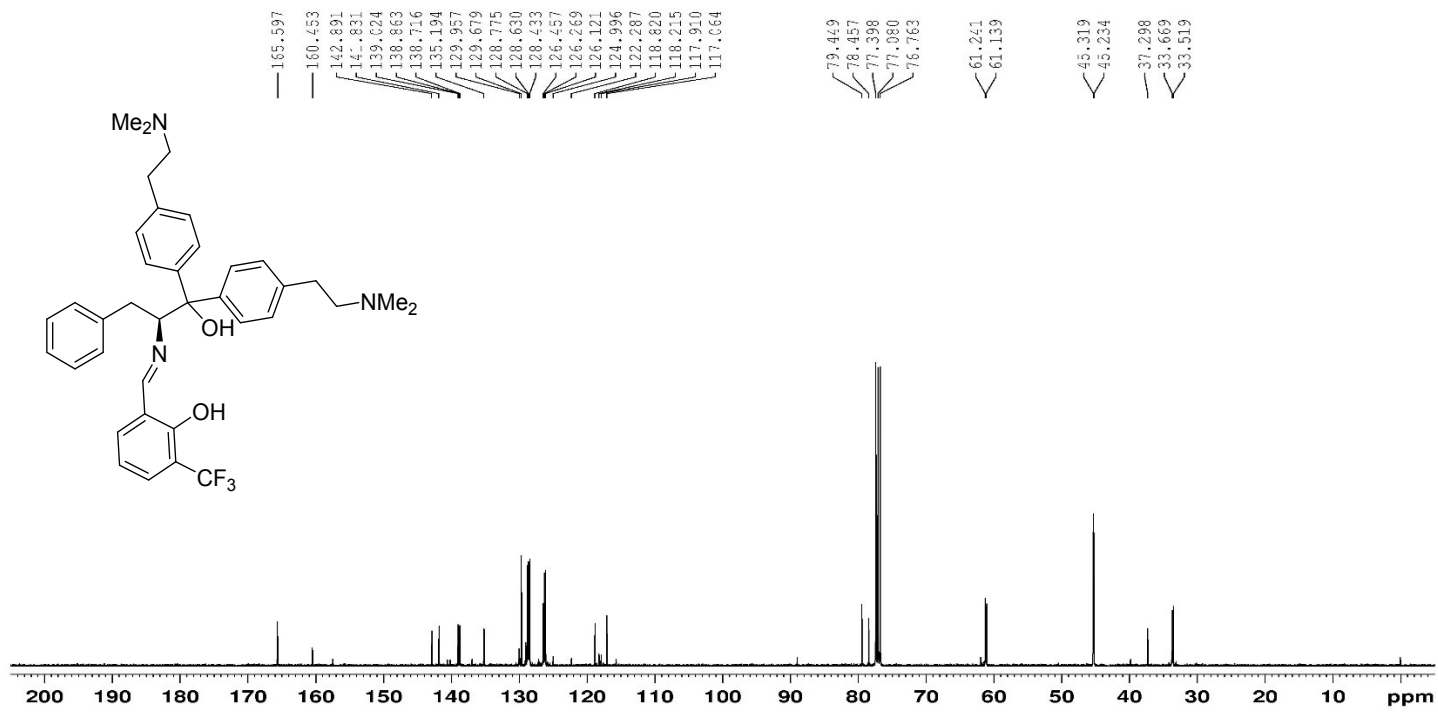



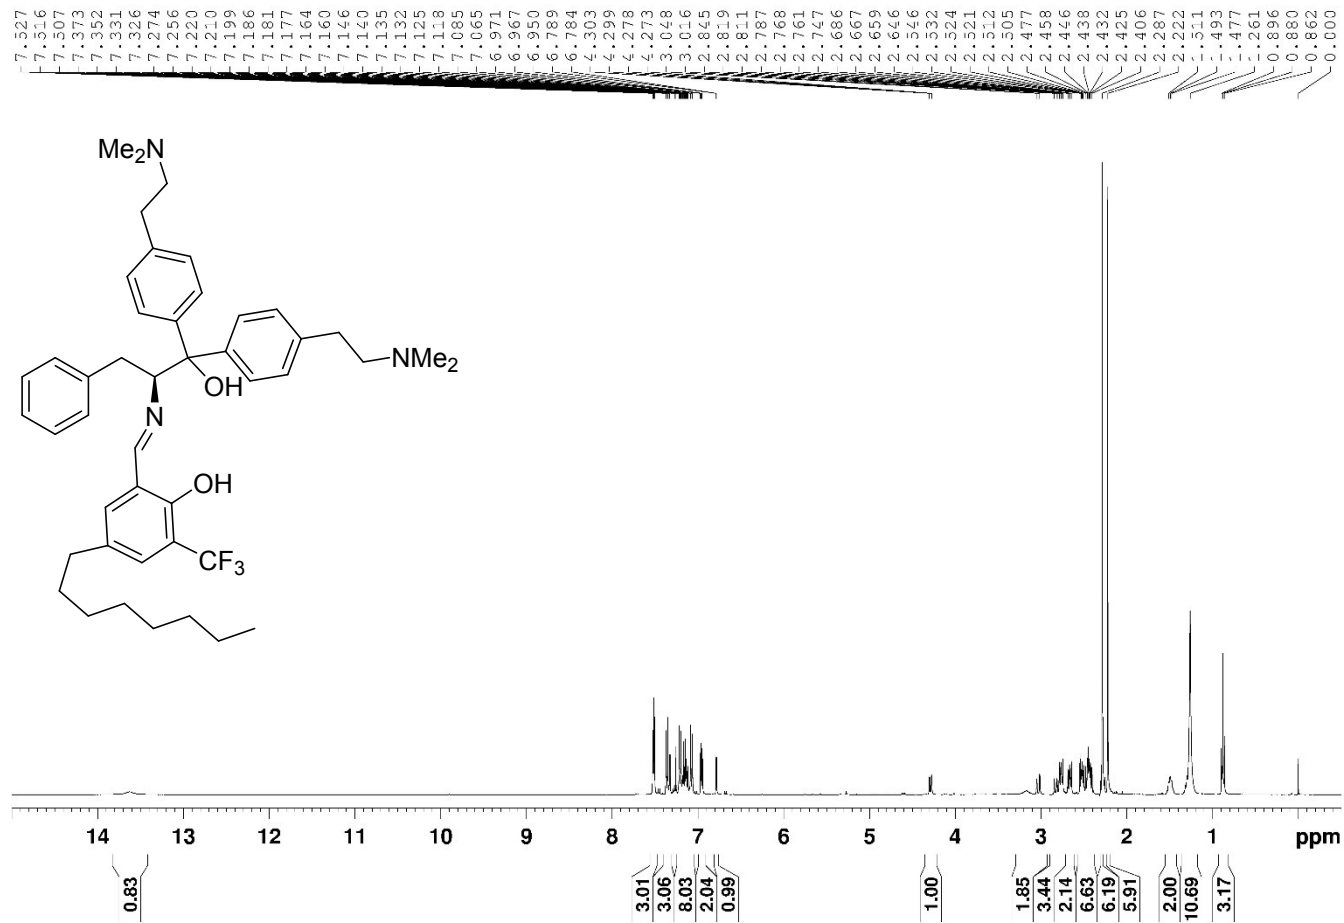

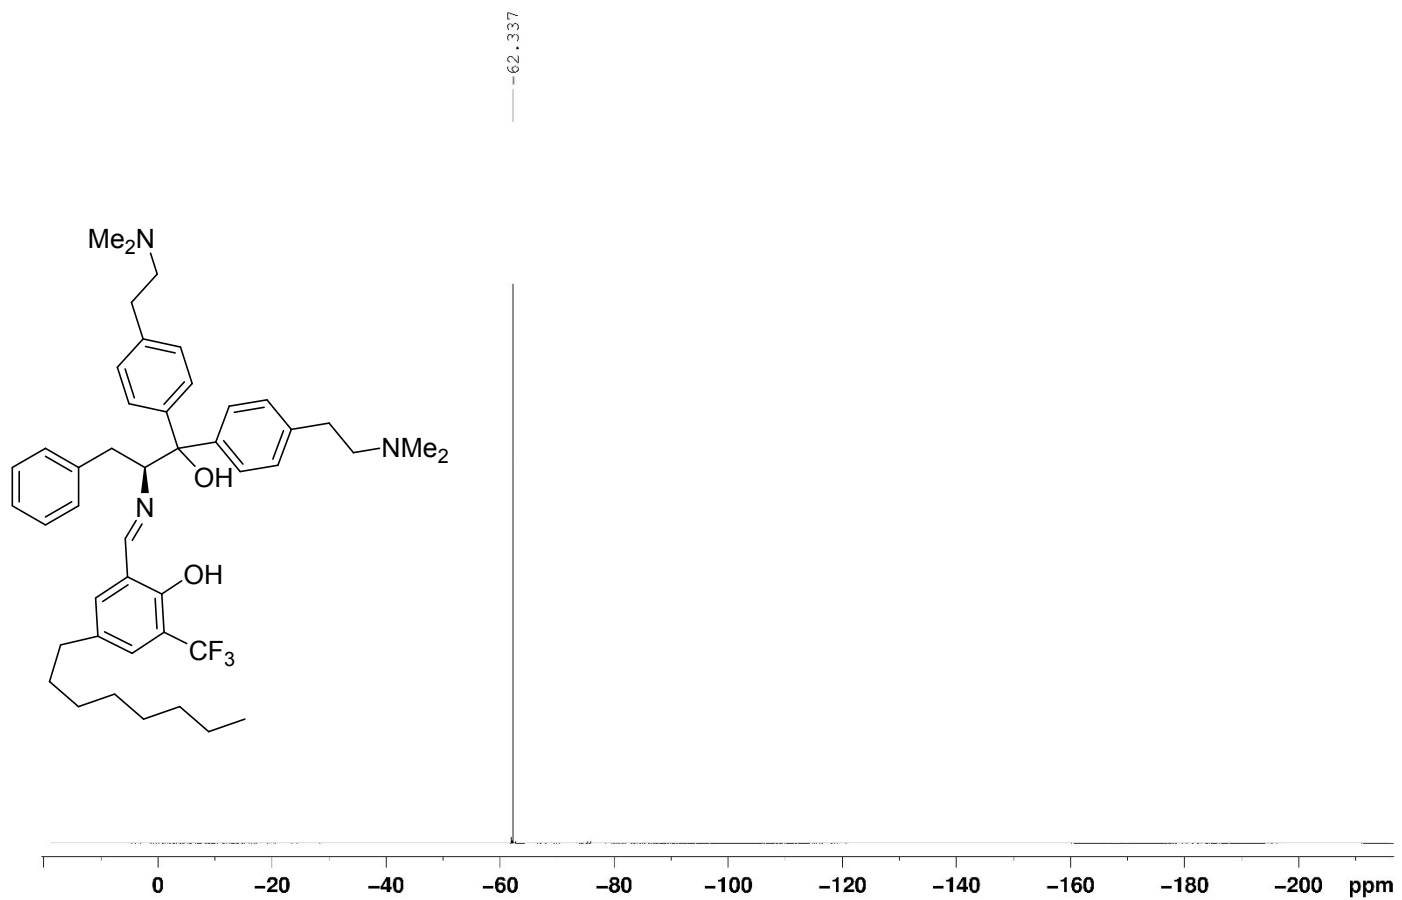

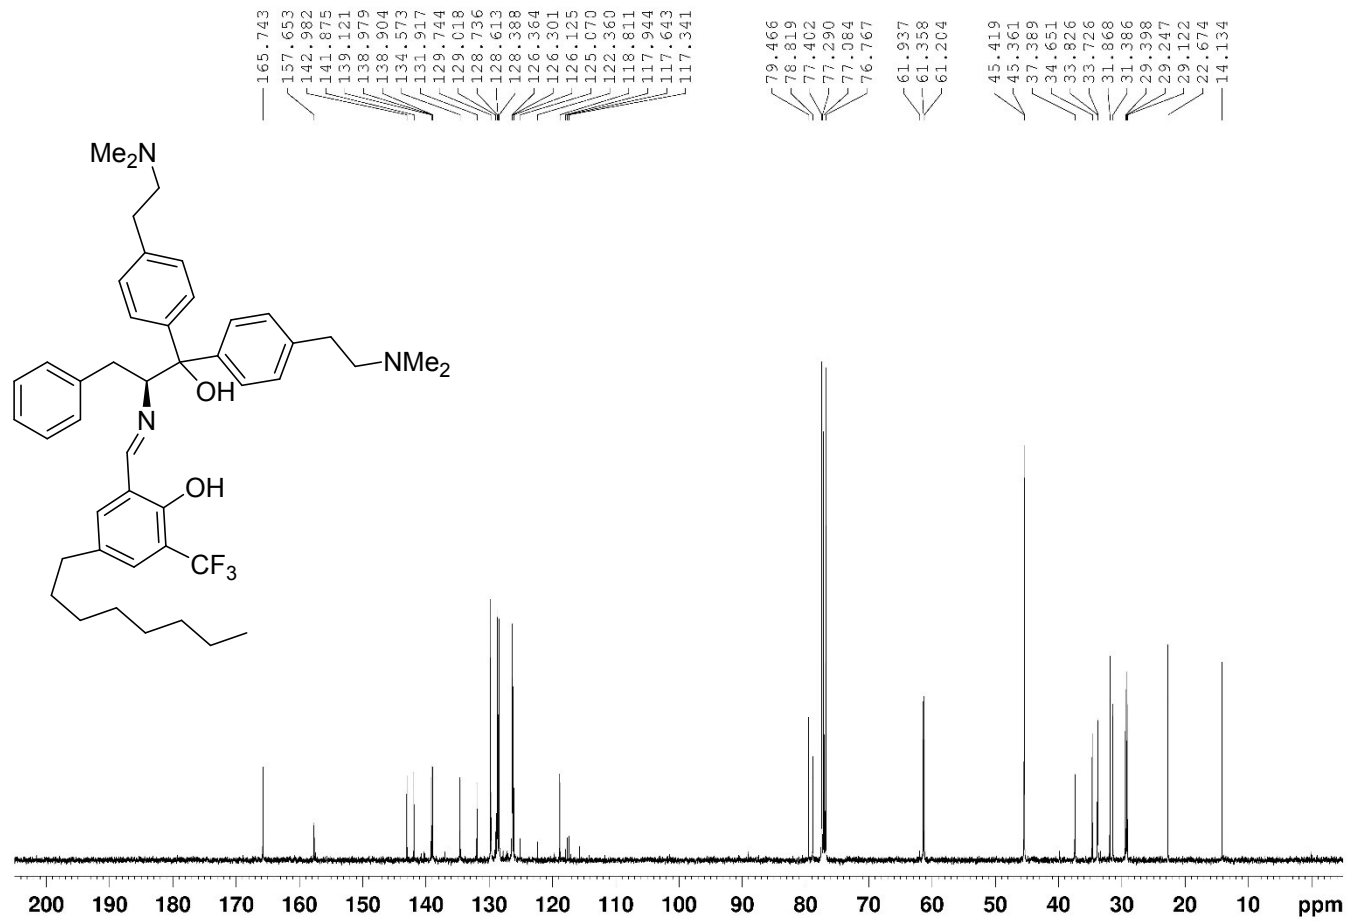

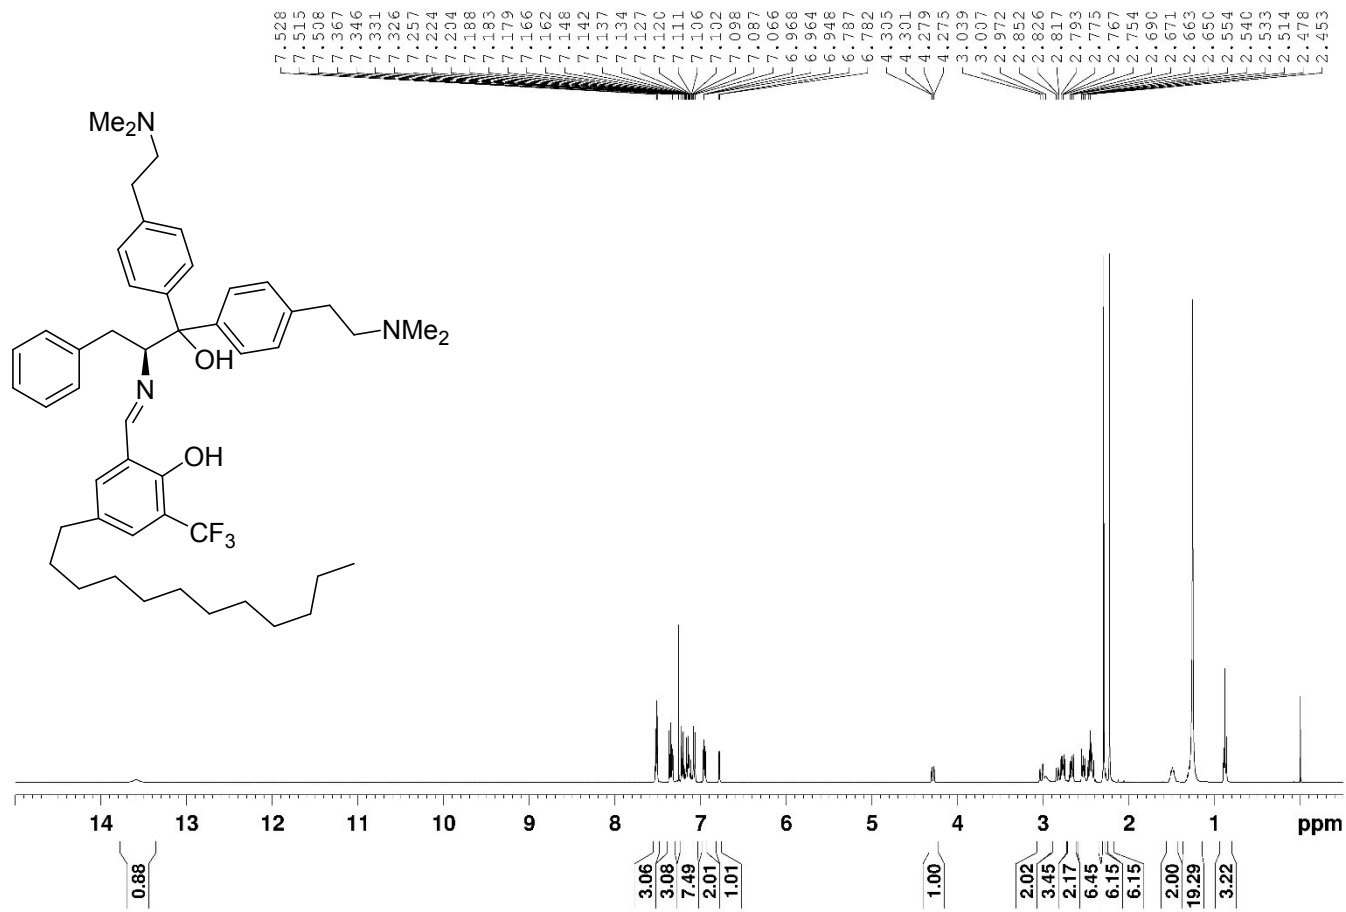

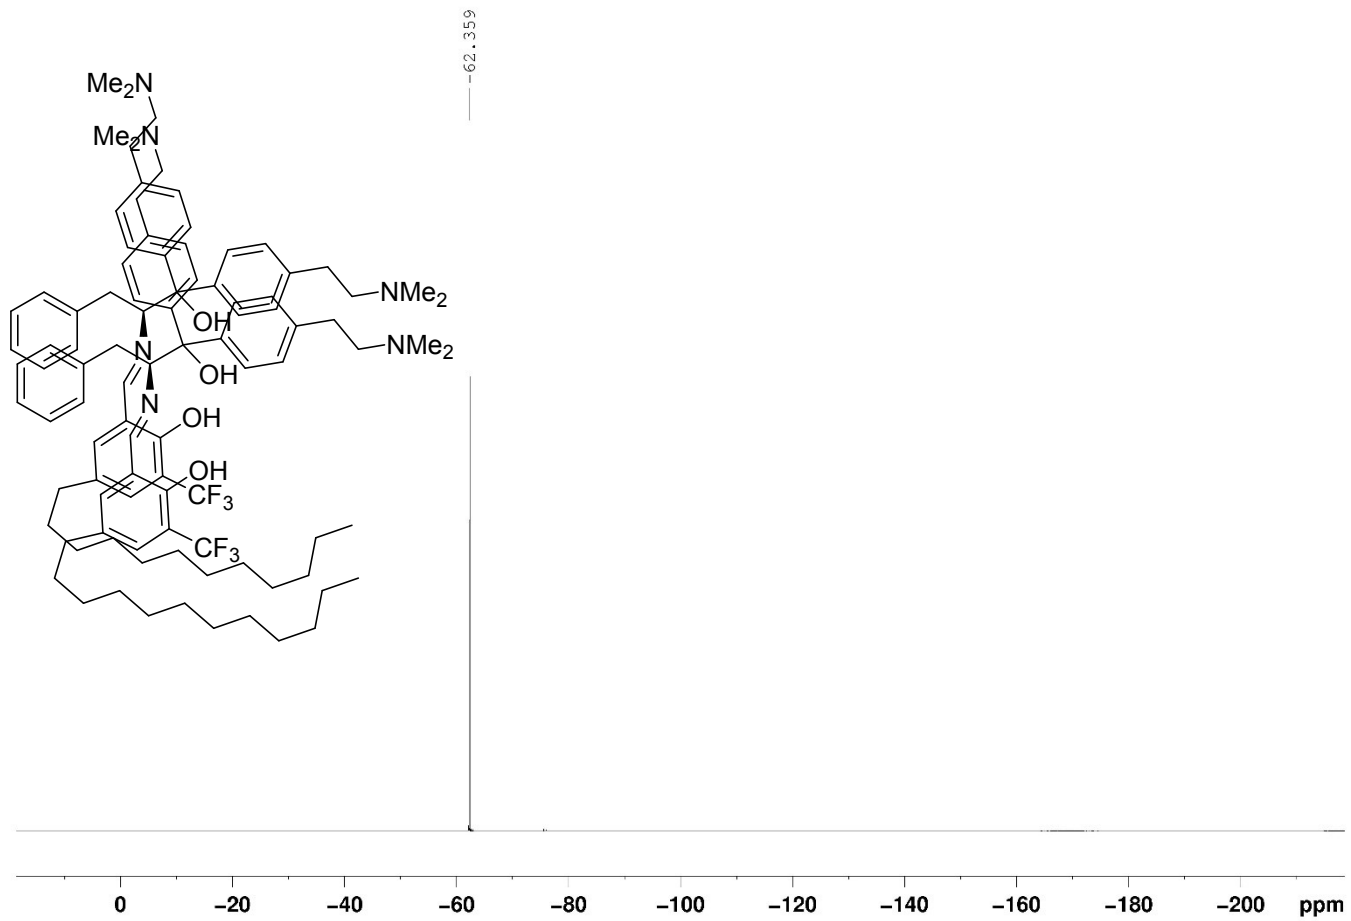

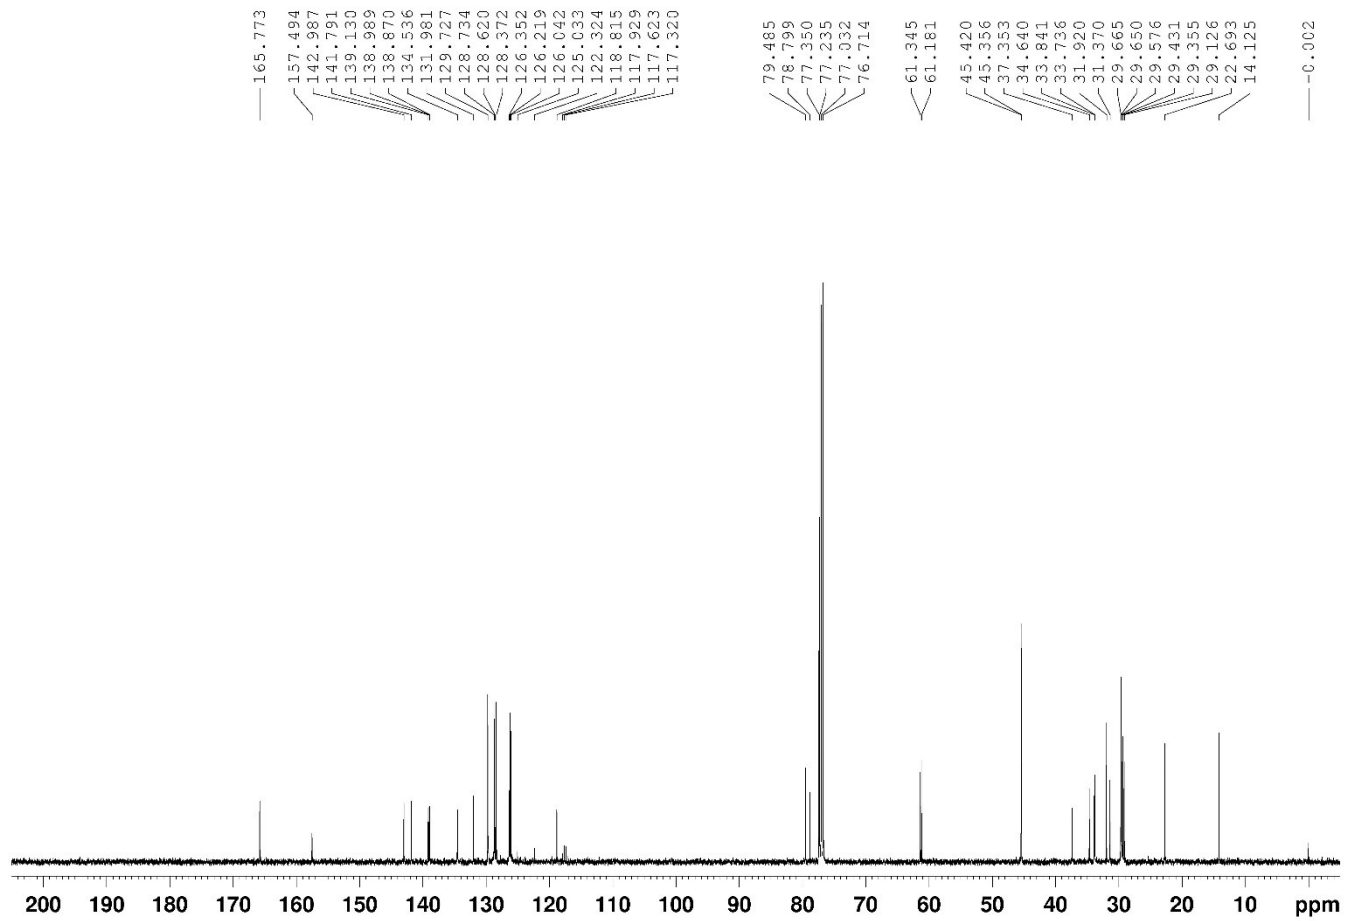

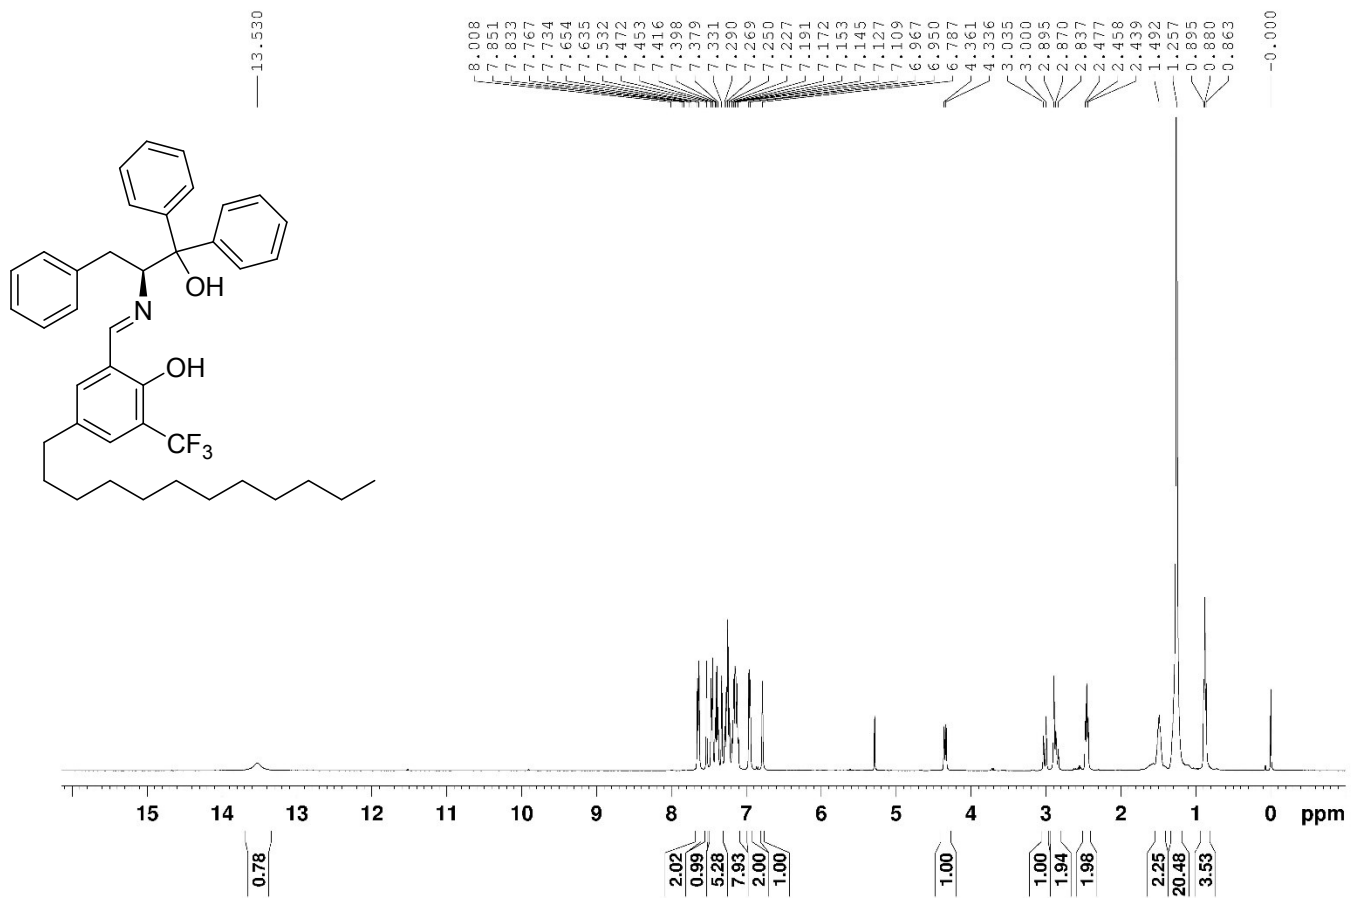

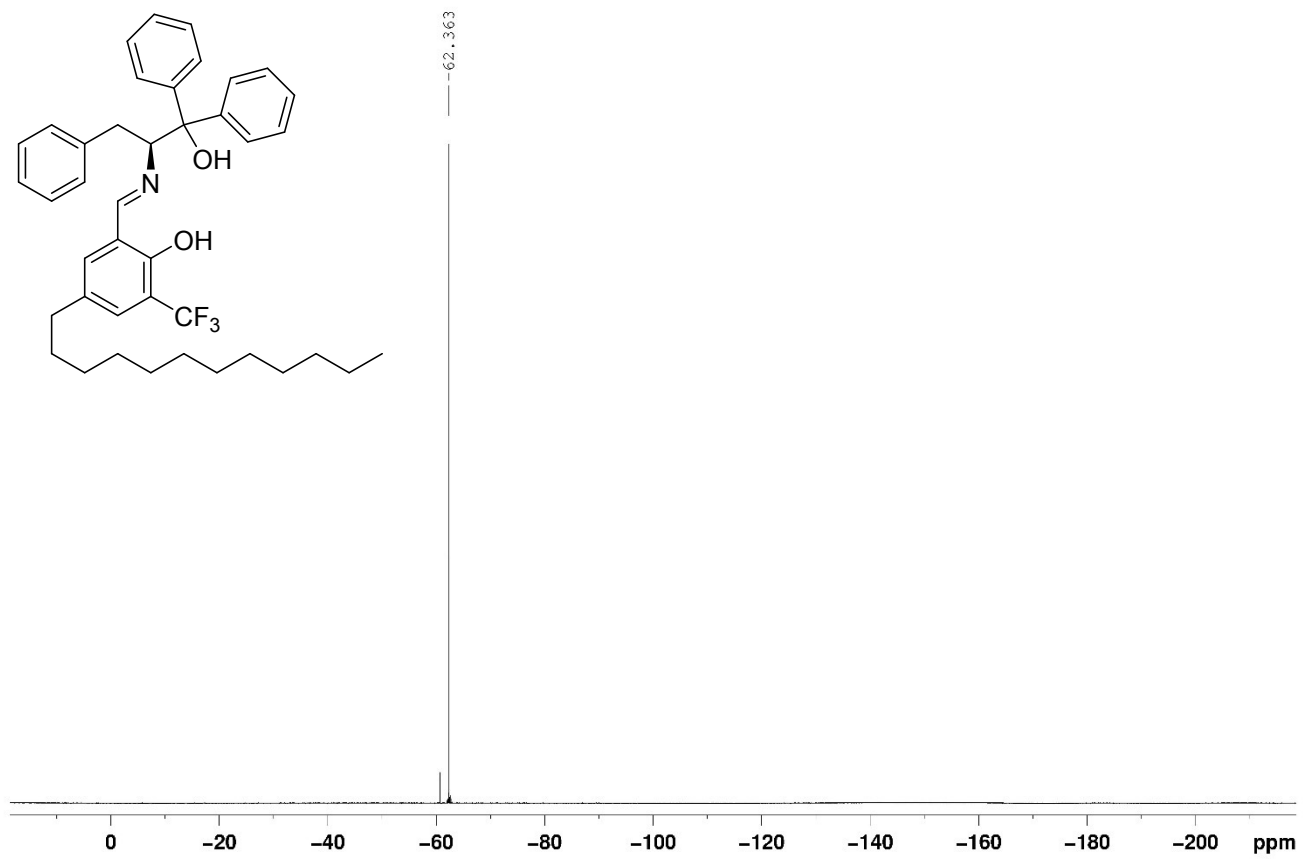



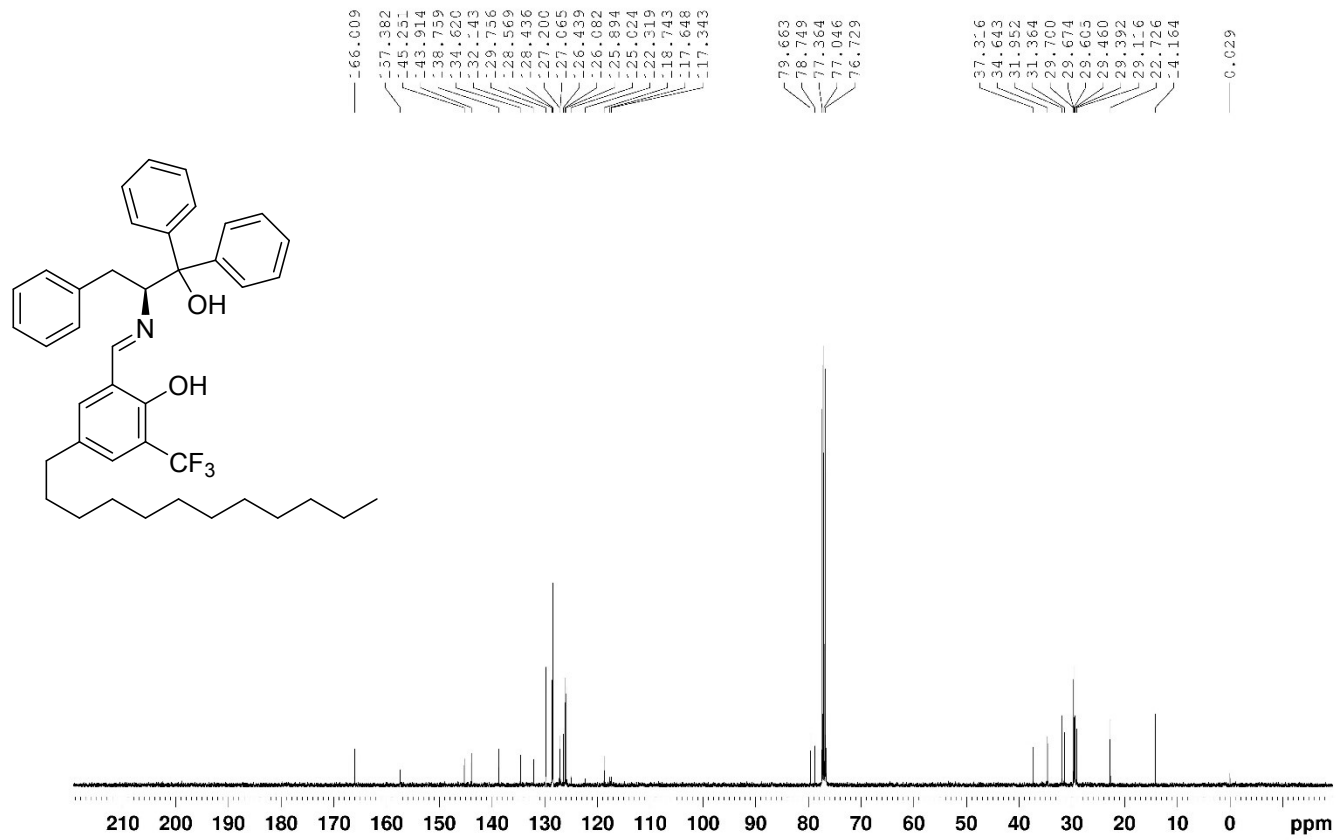

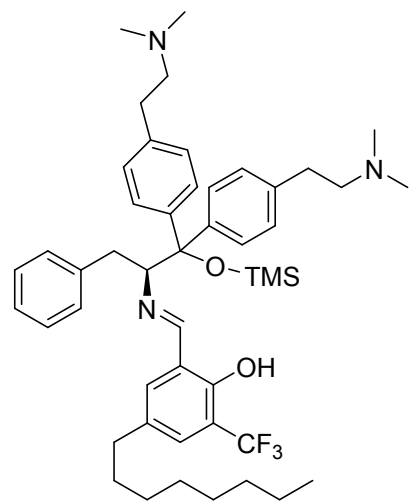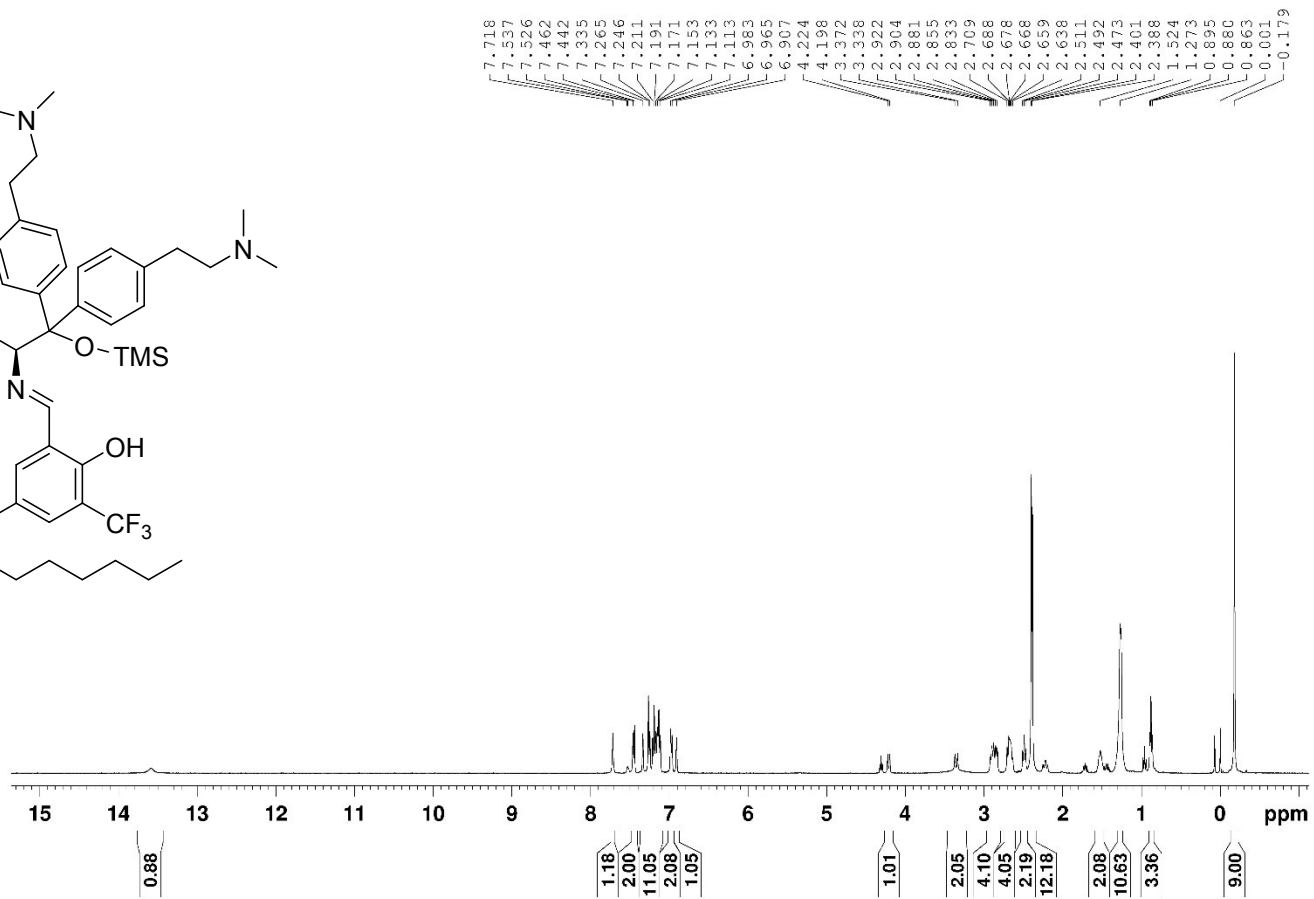

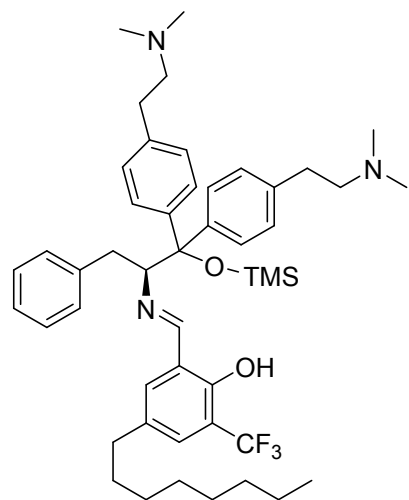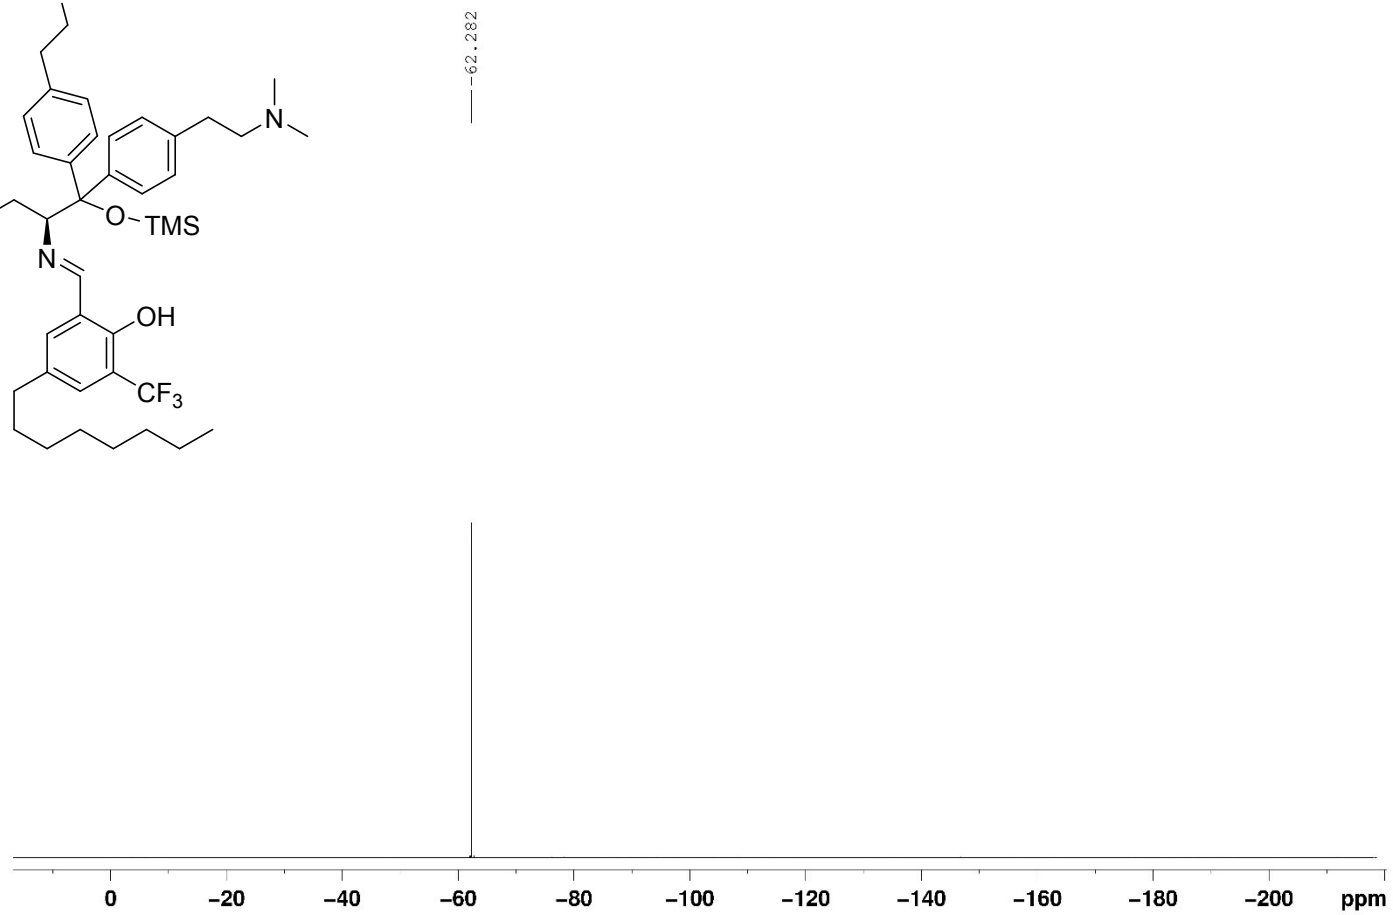

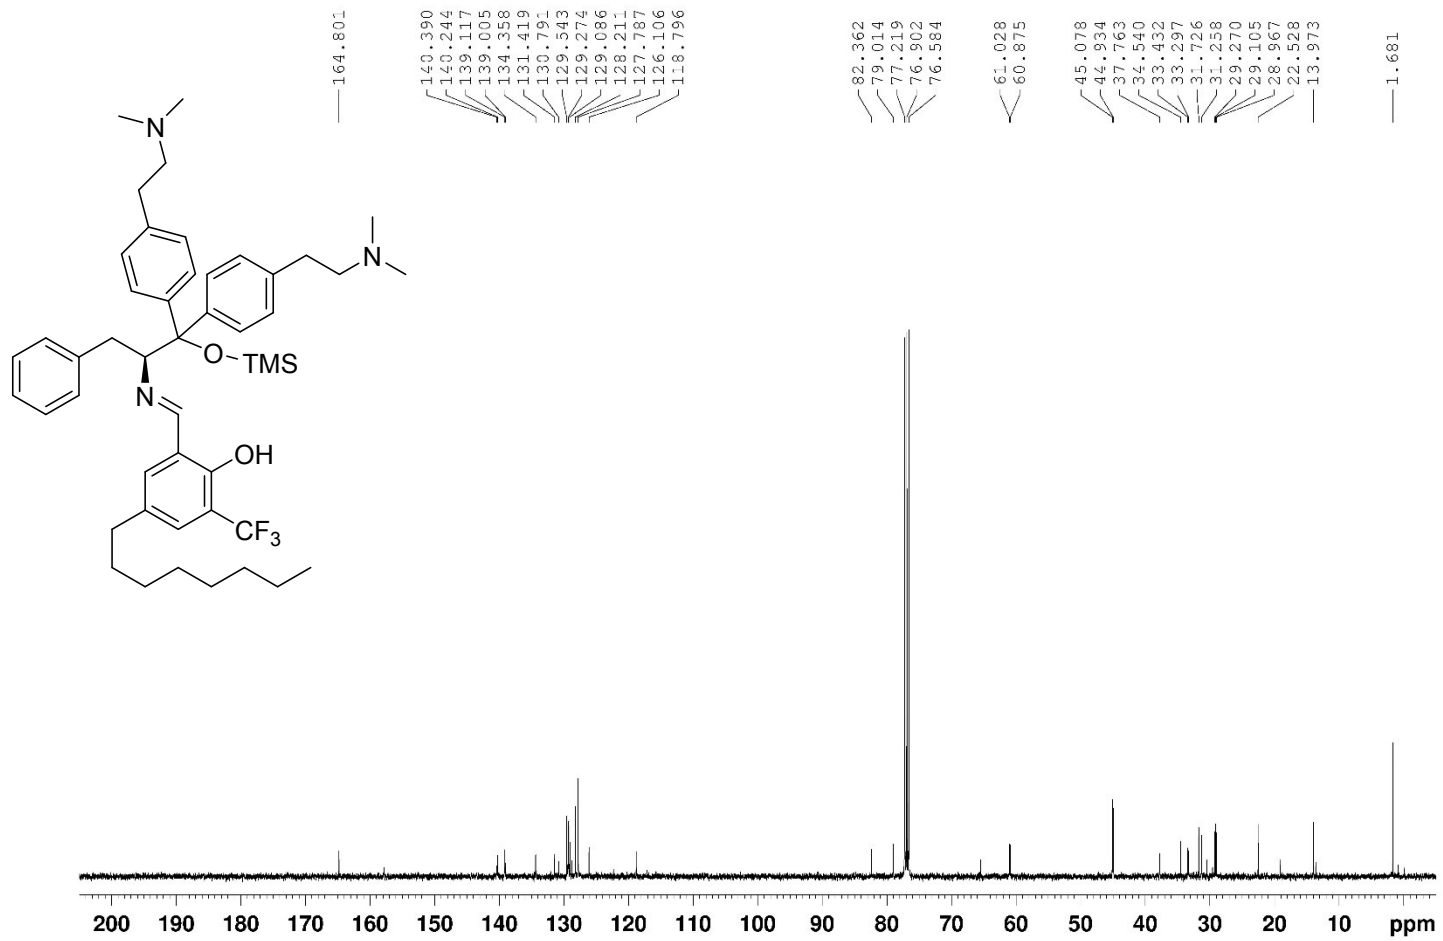

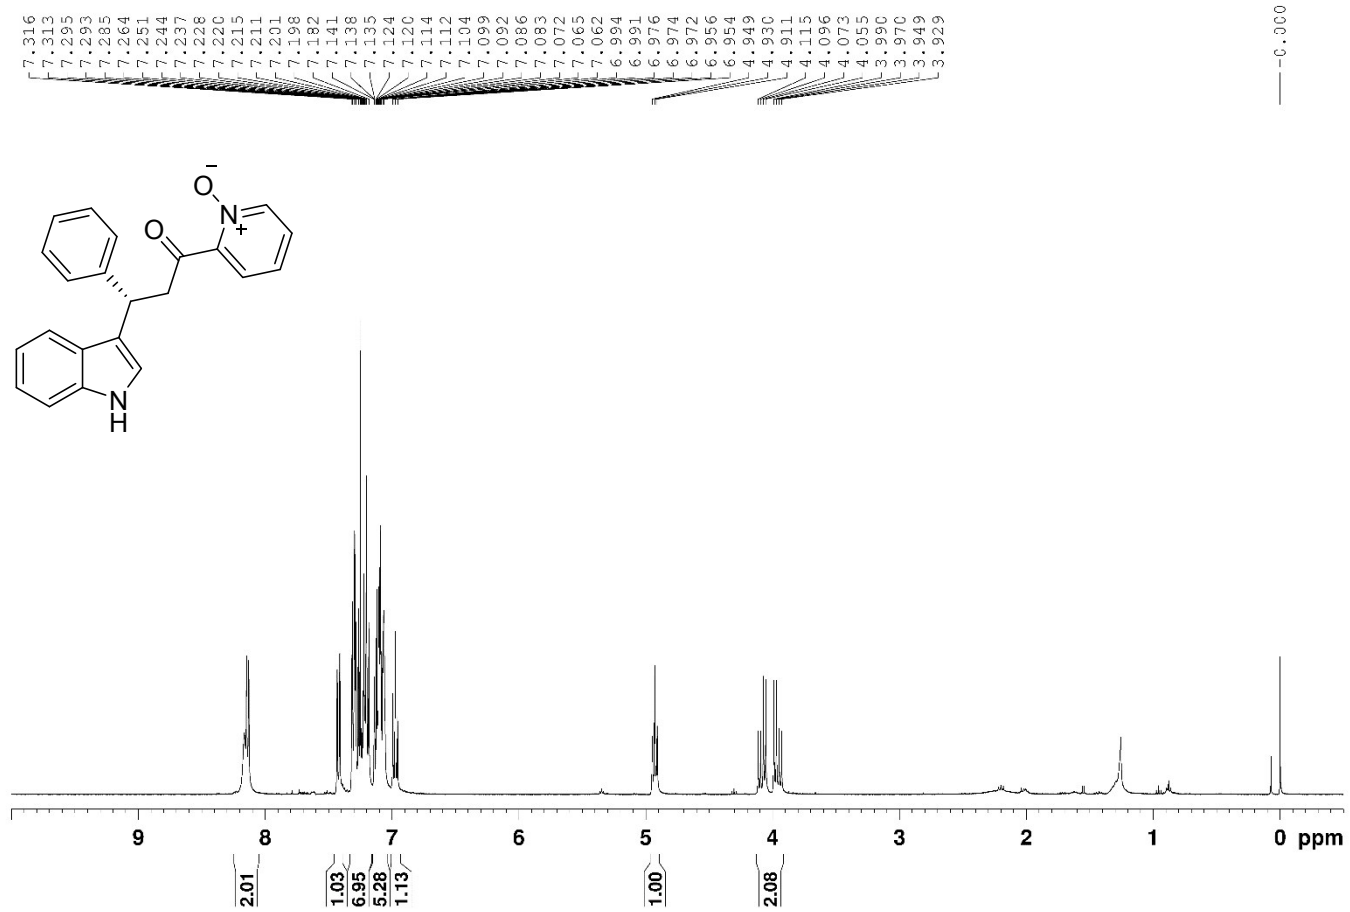

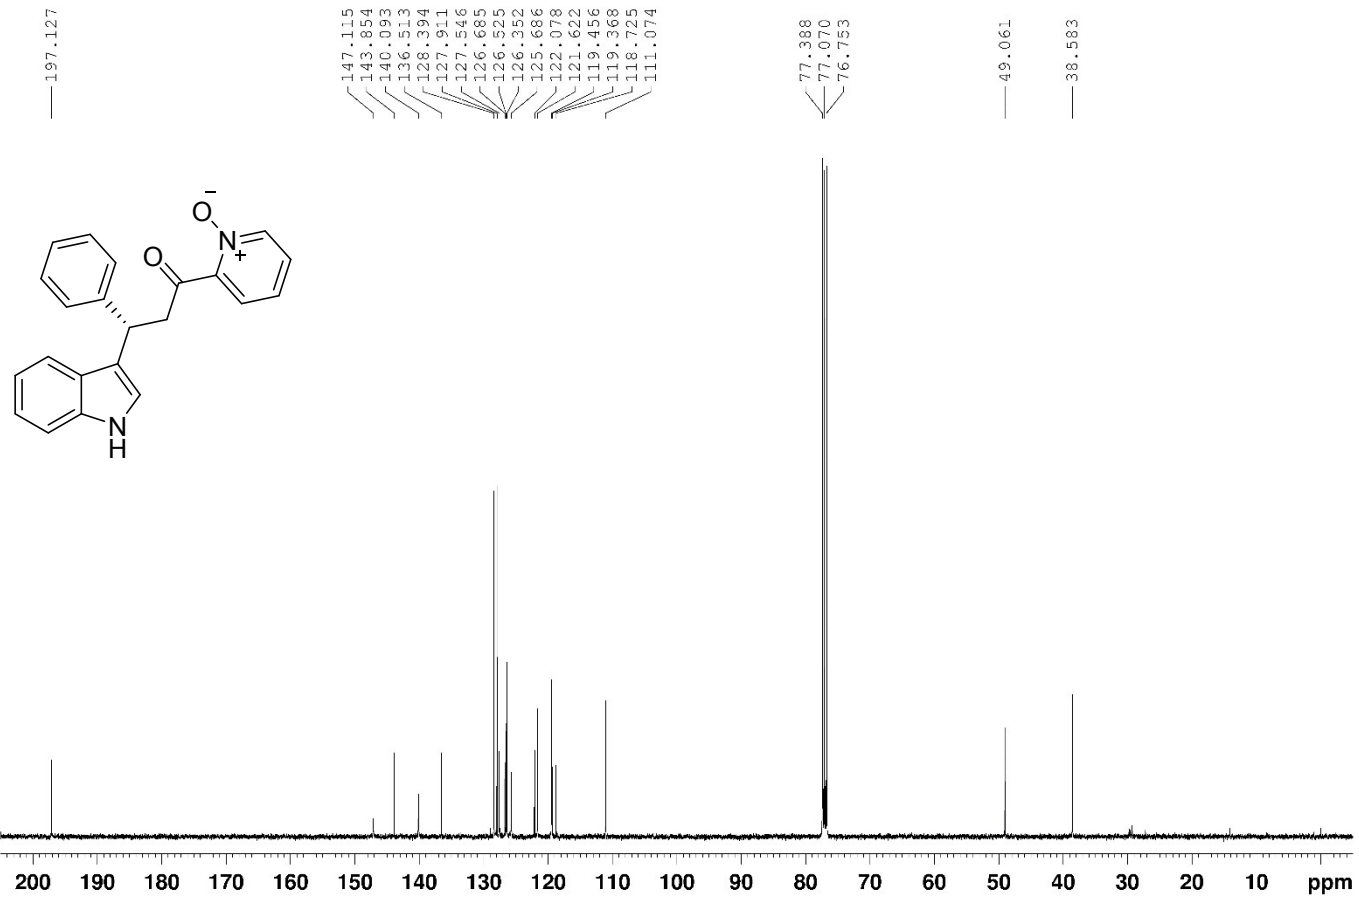

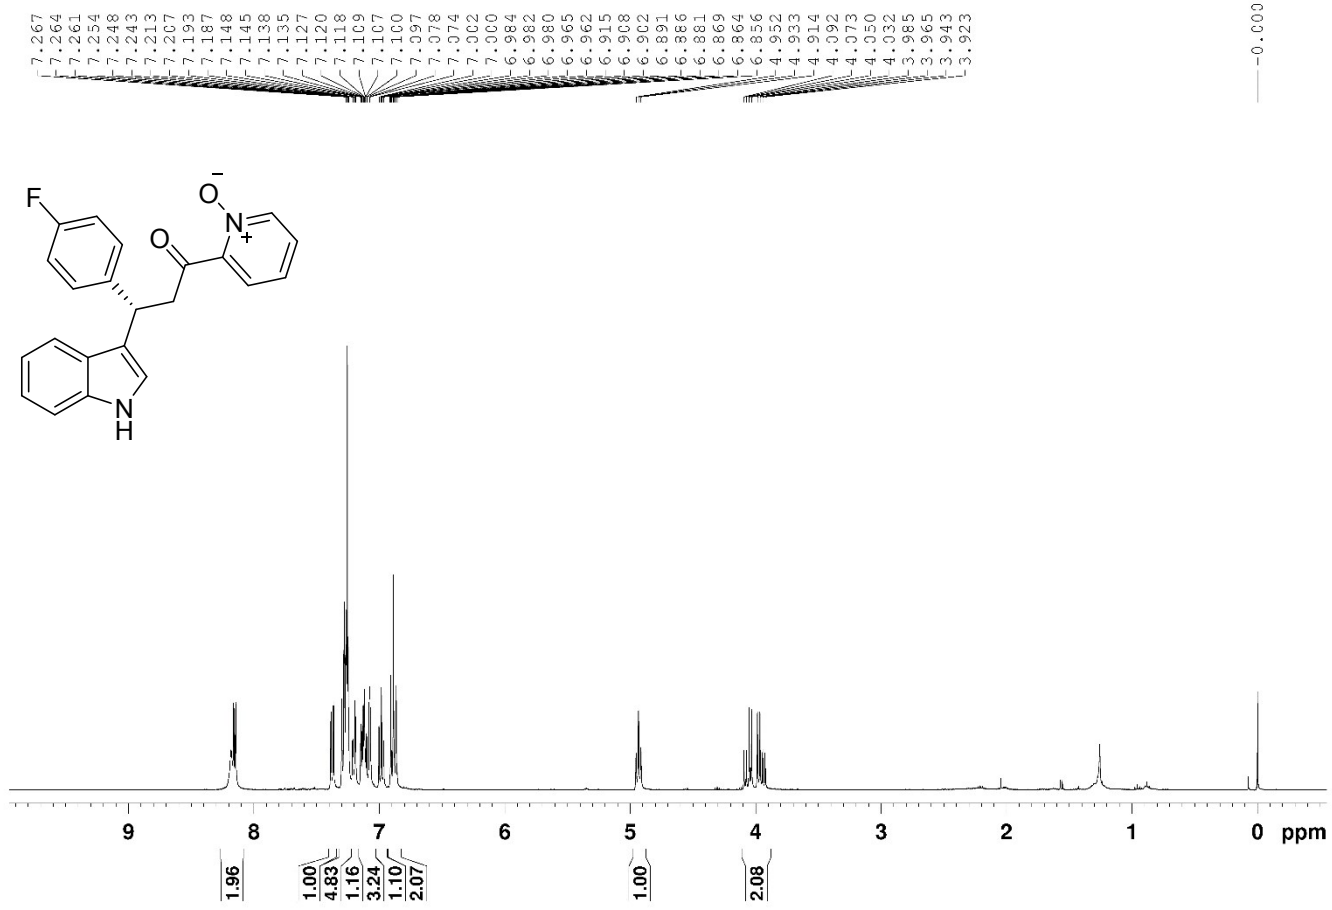

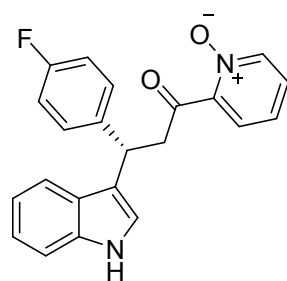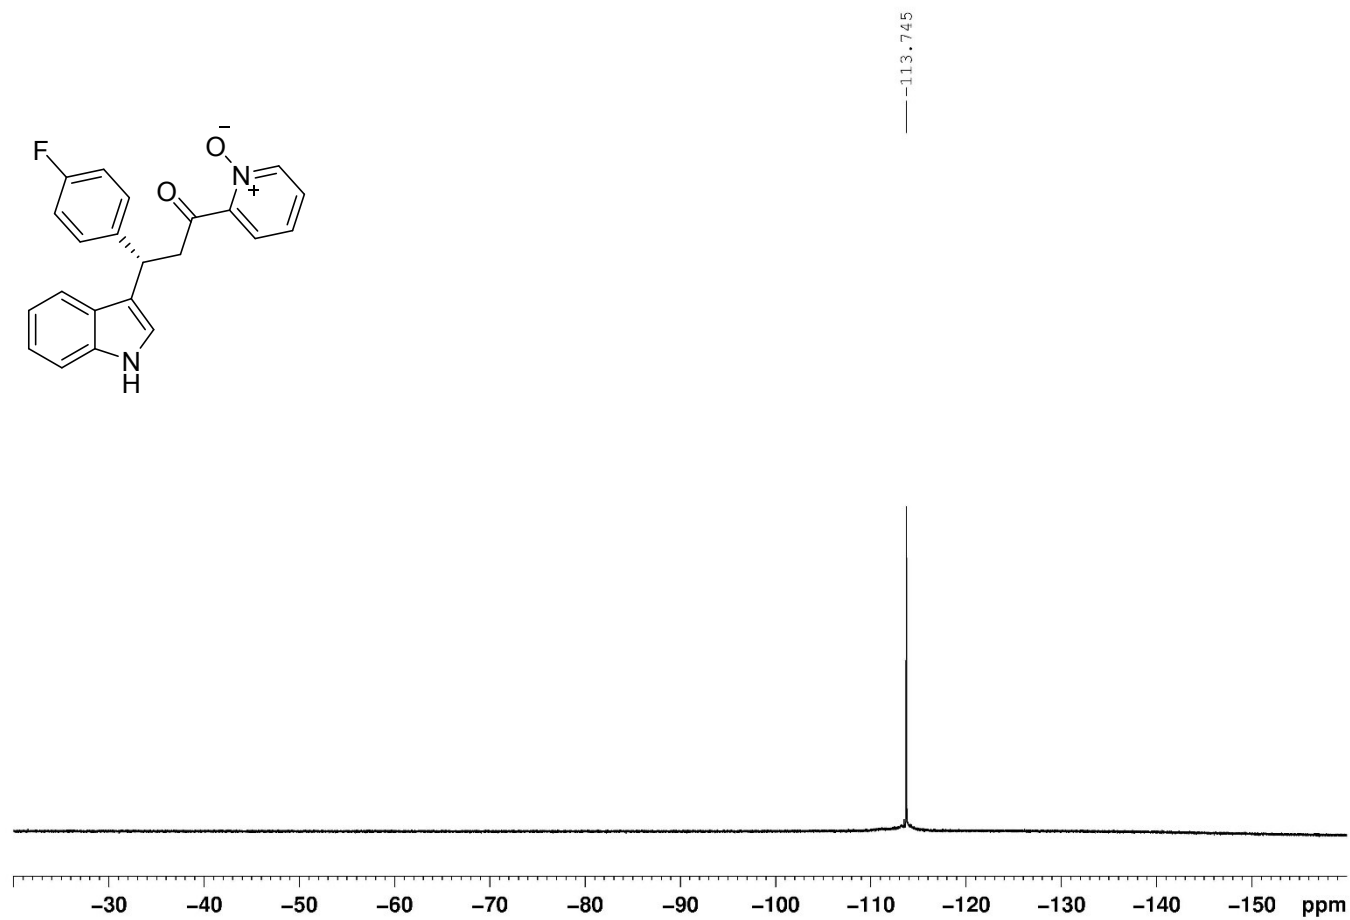



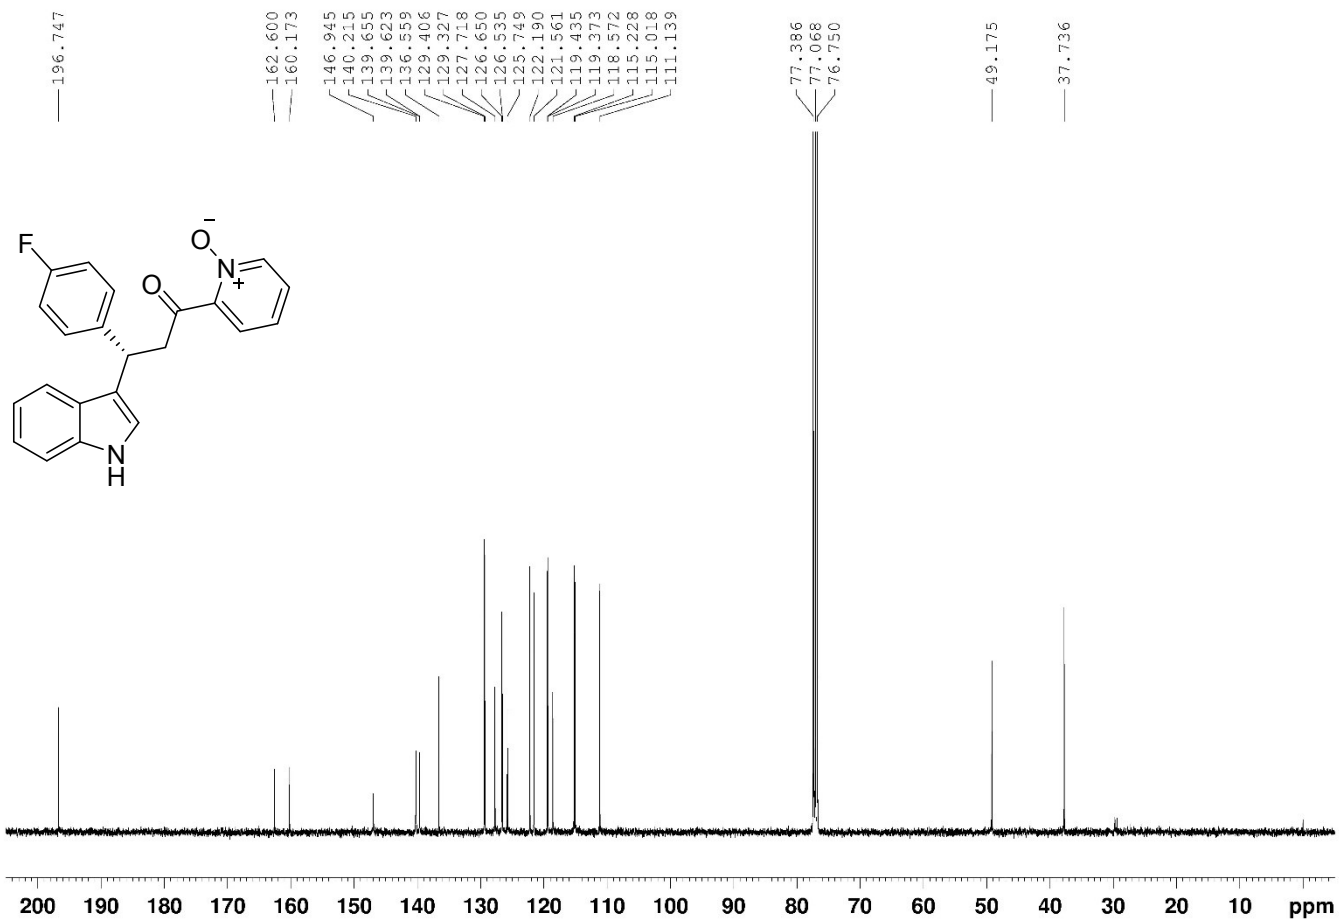

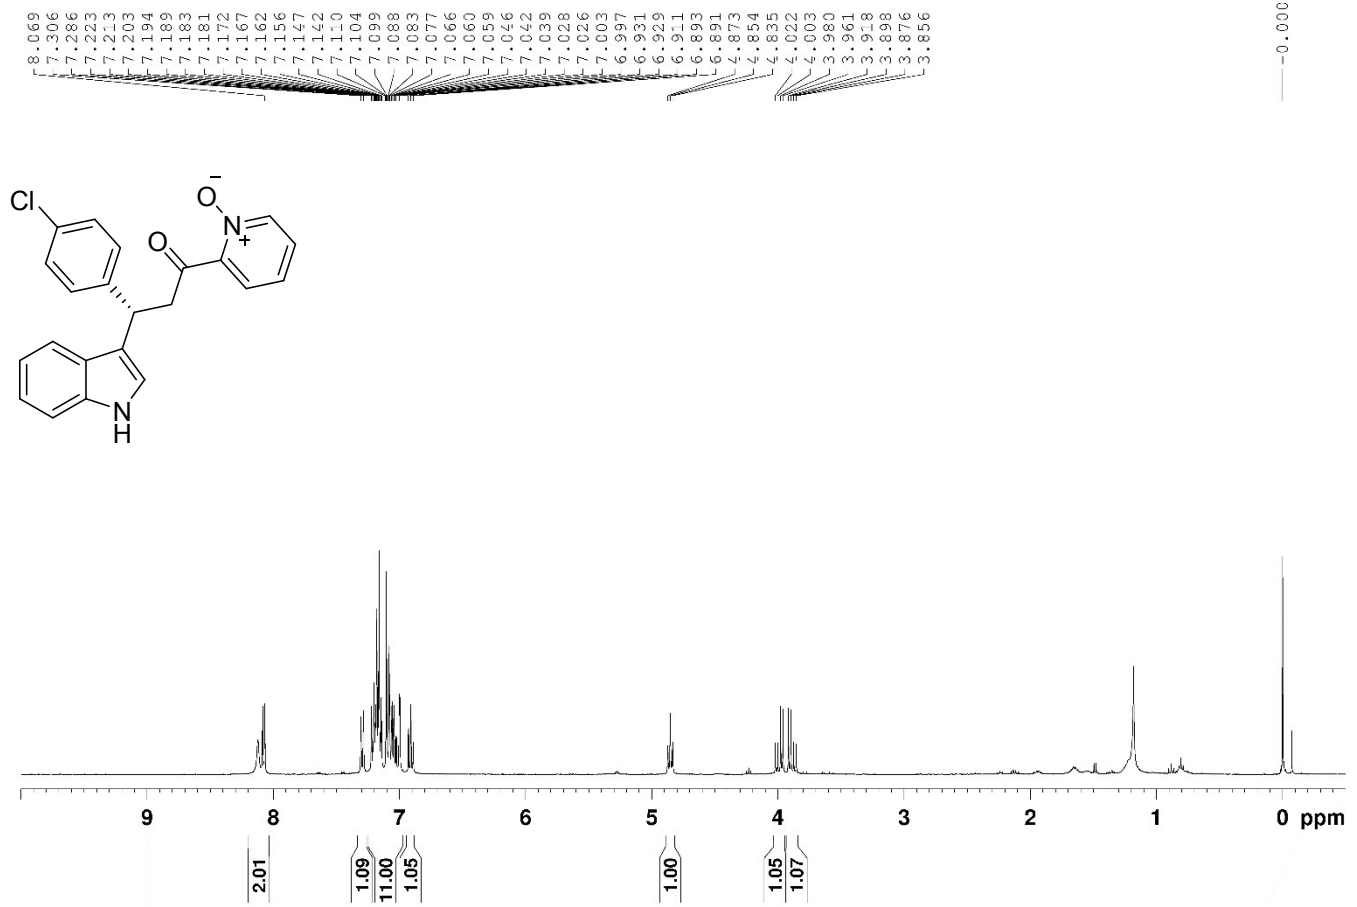

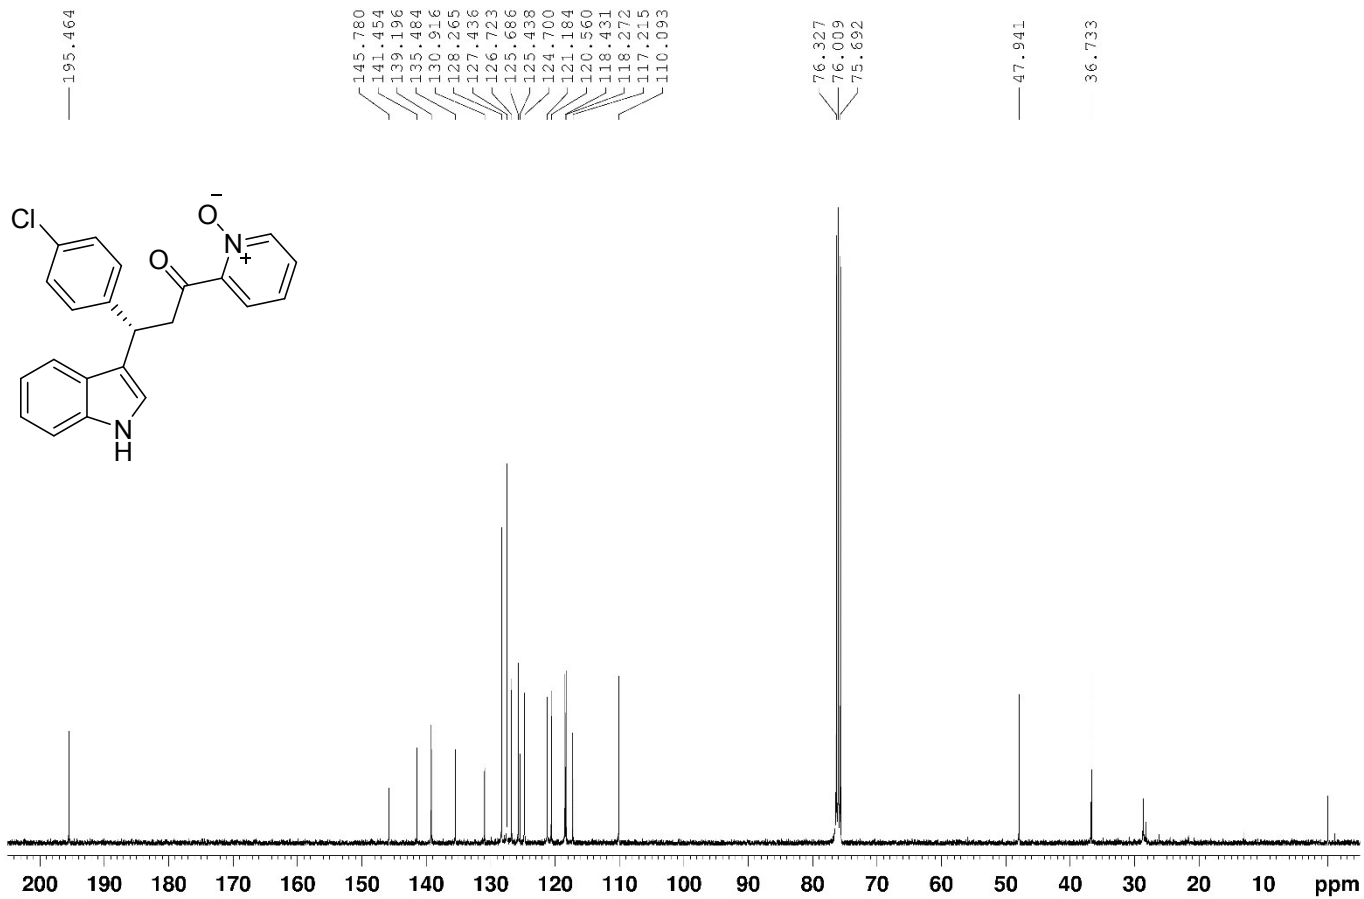

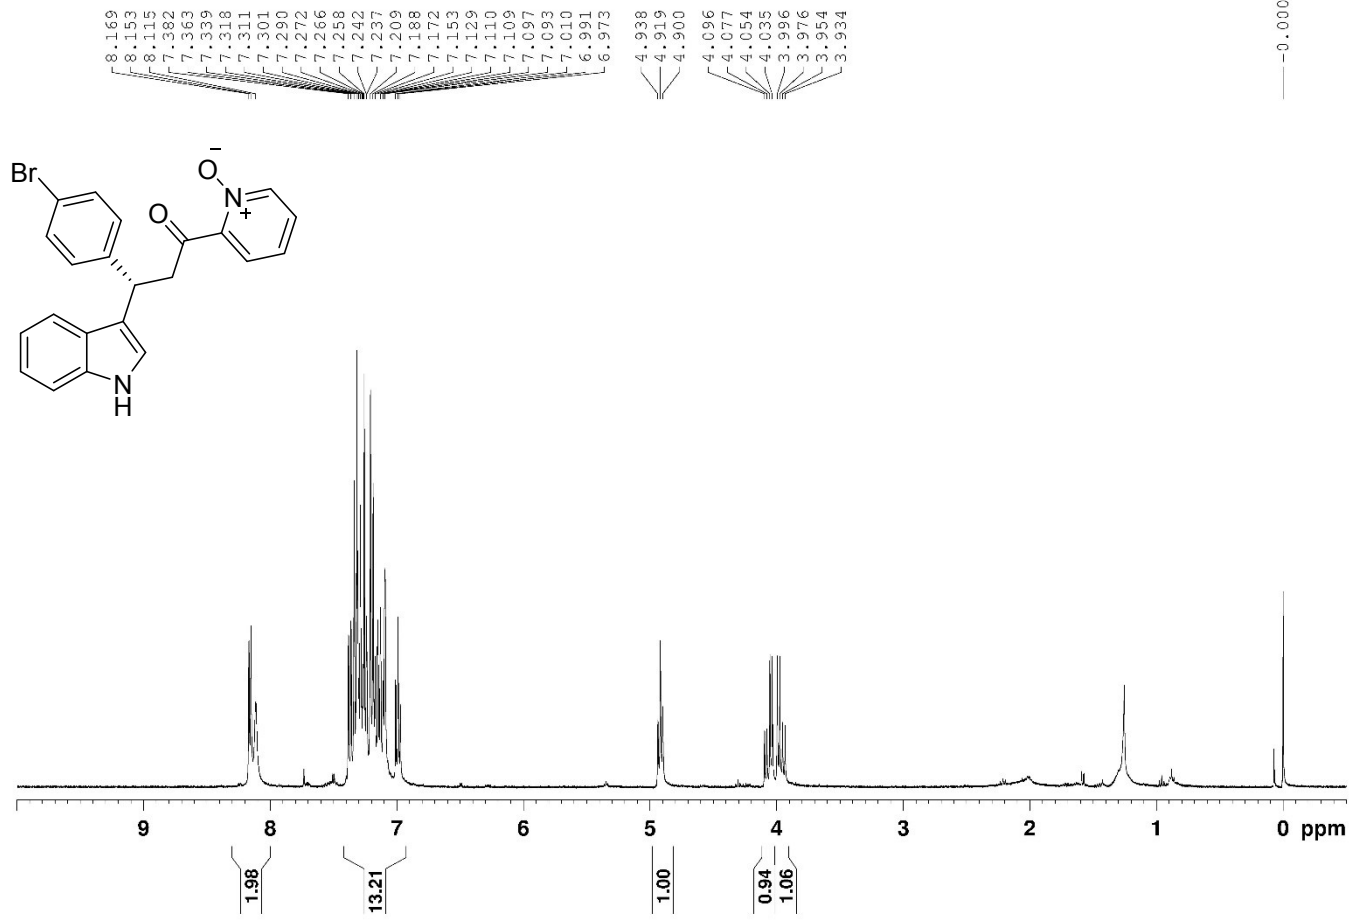

LXP-4d/13

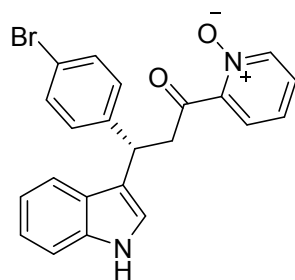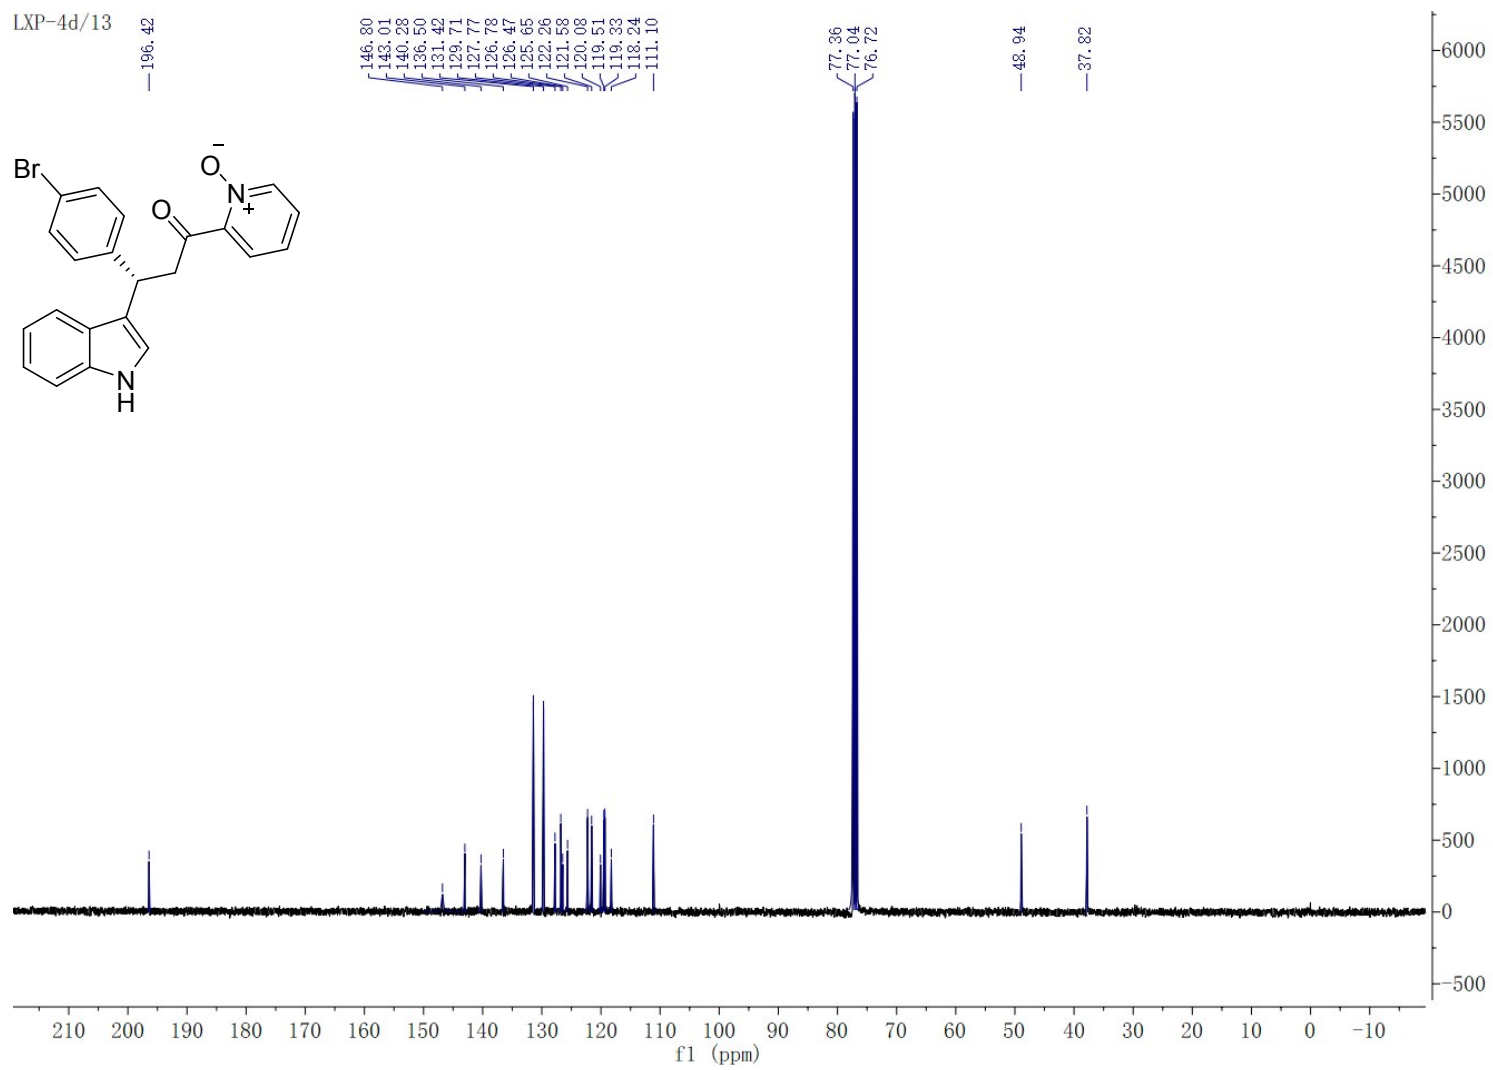

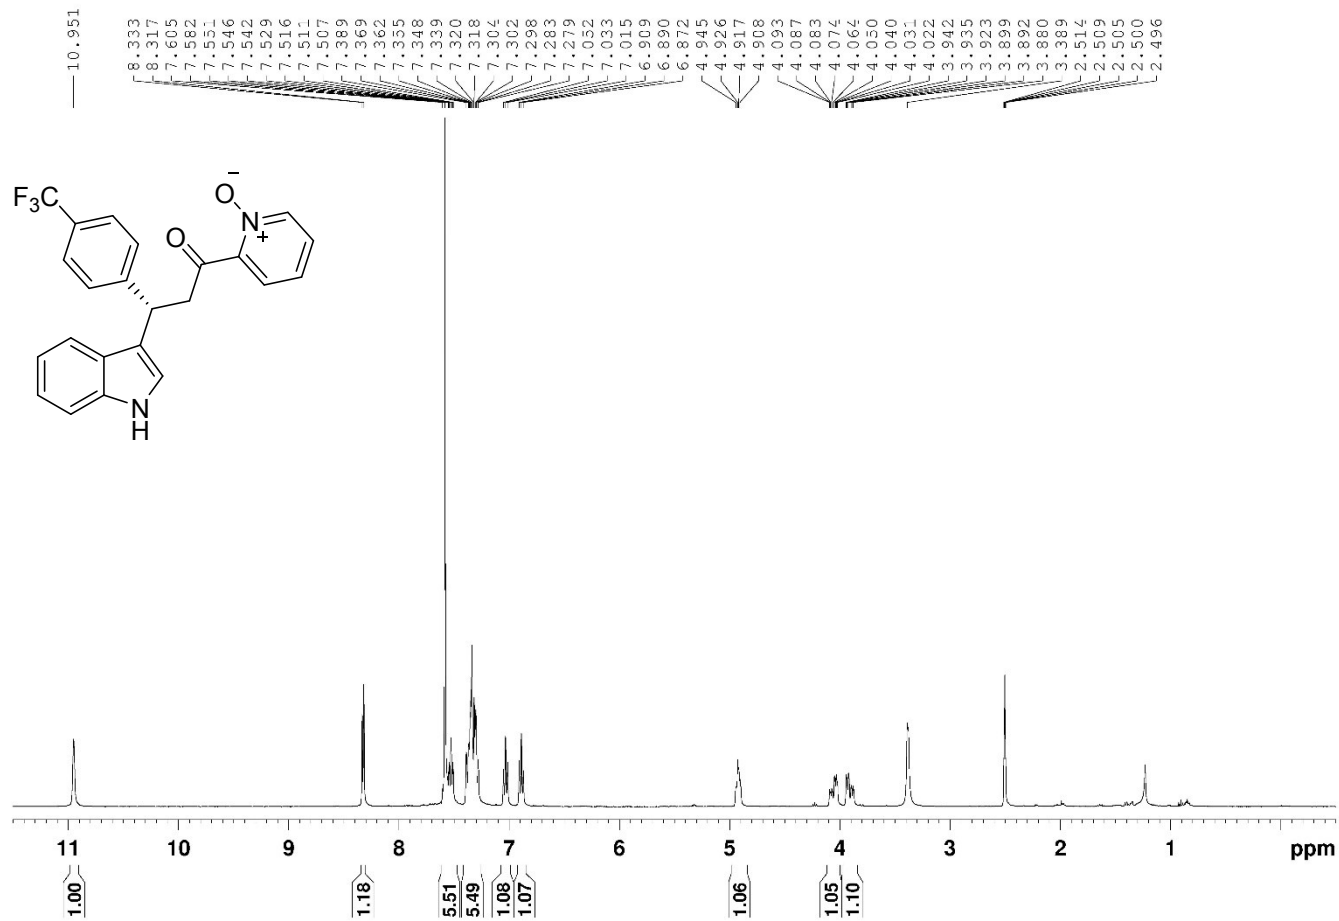

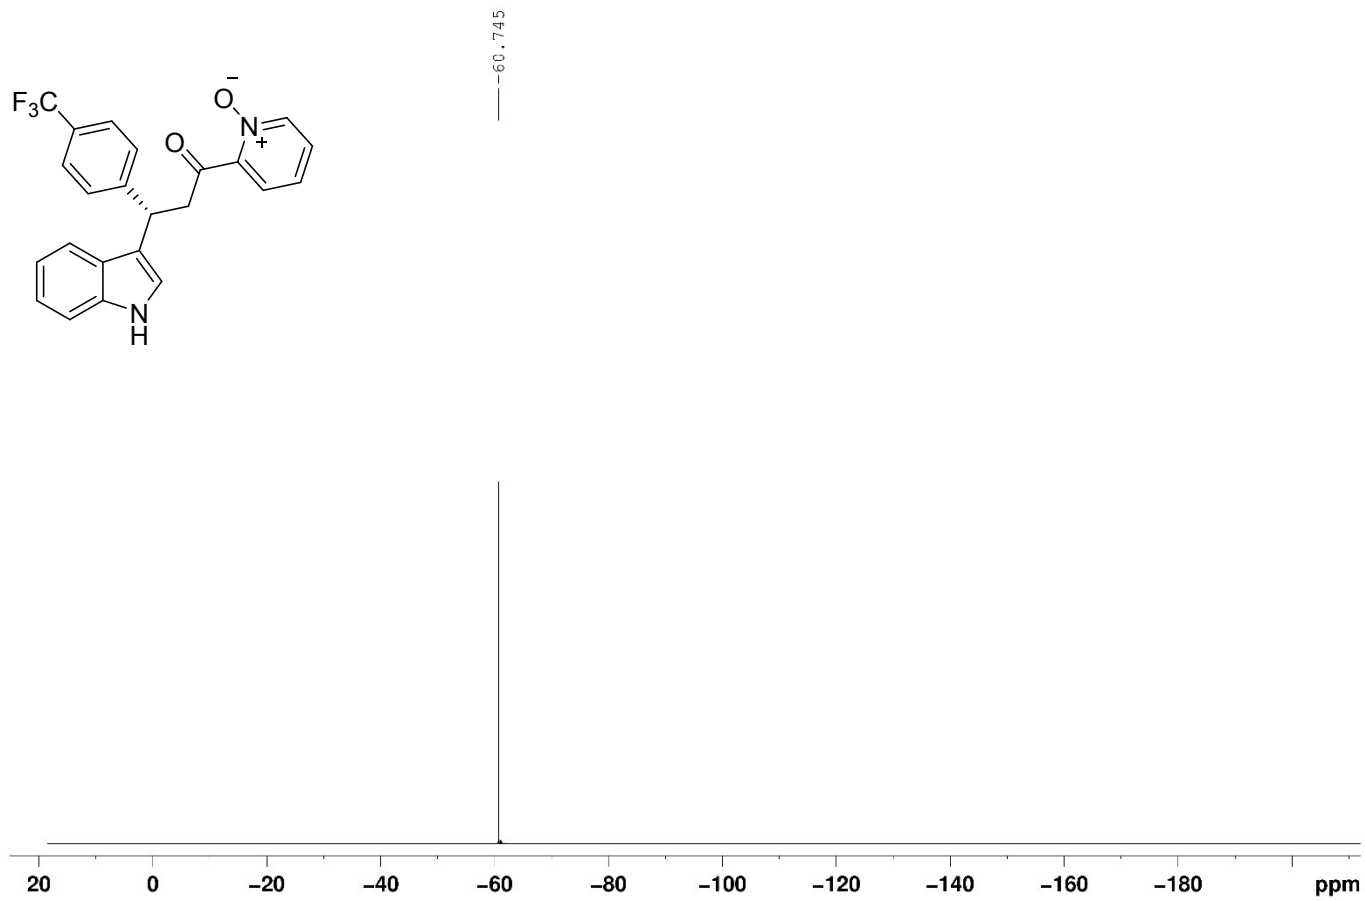

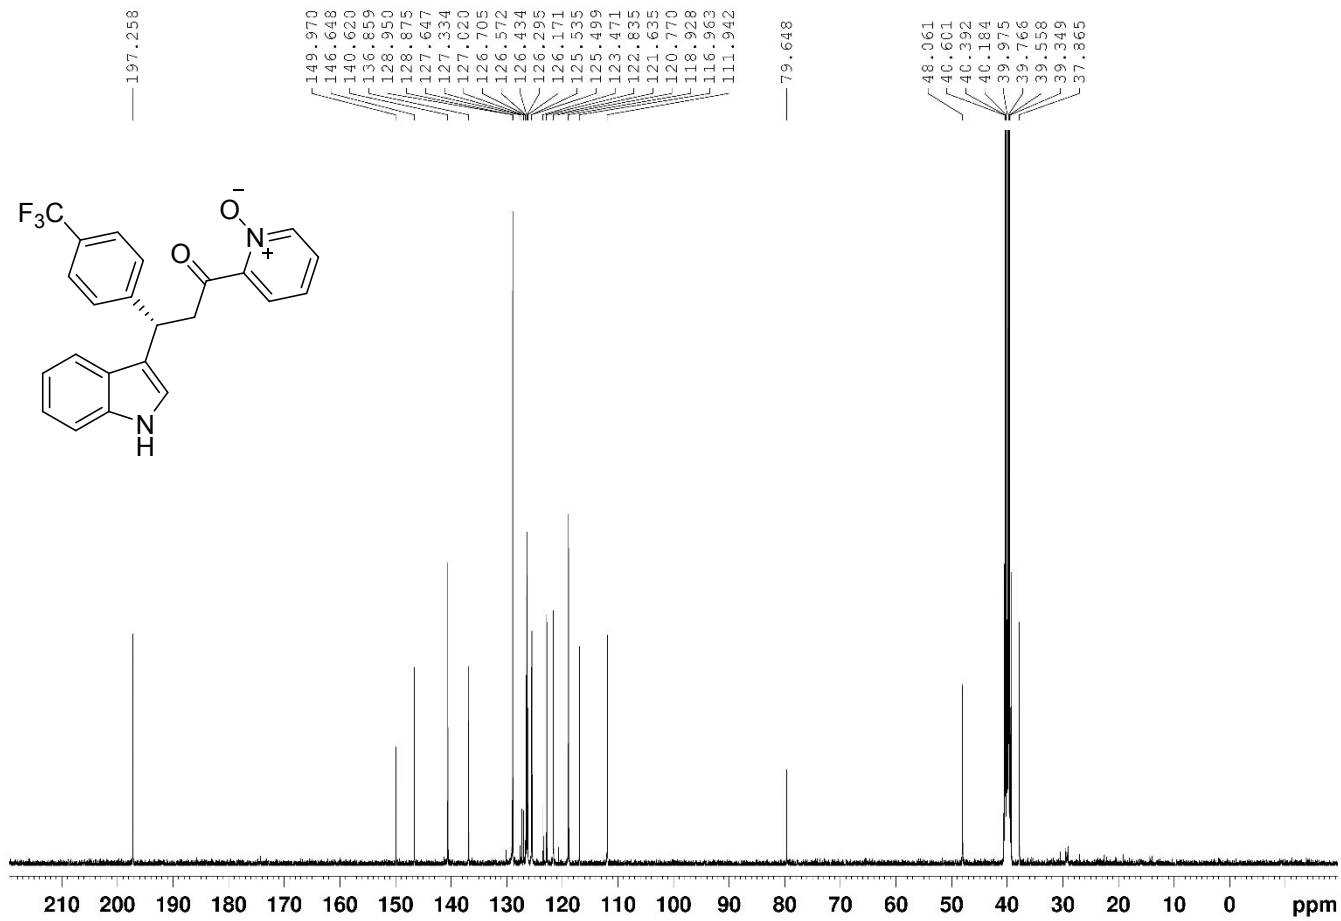



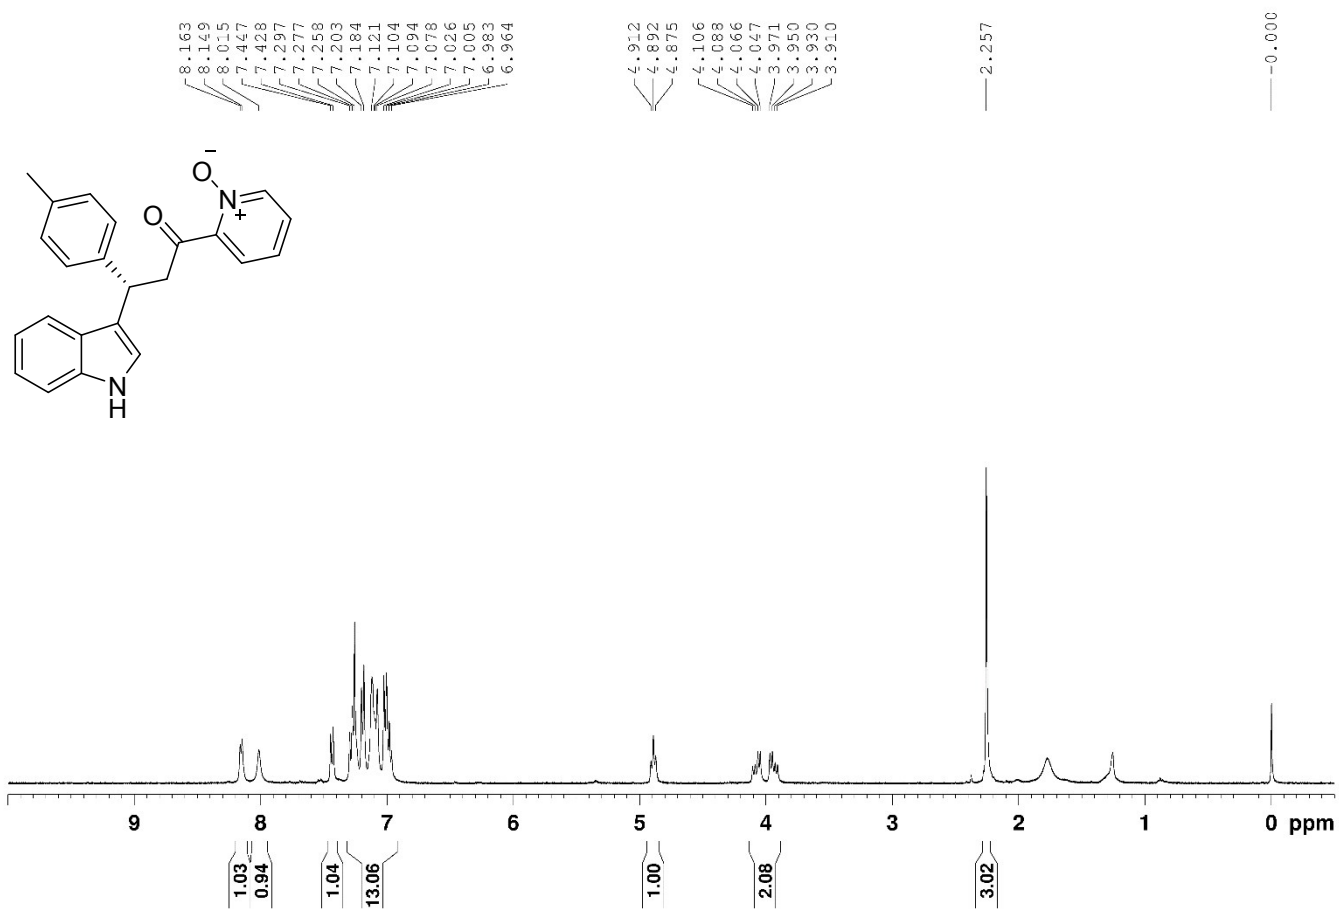

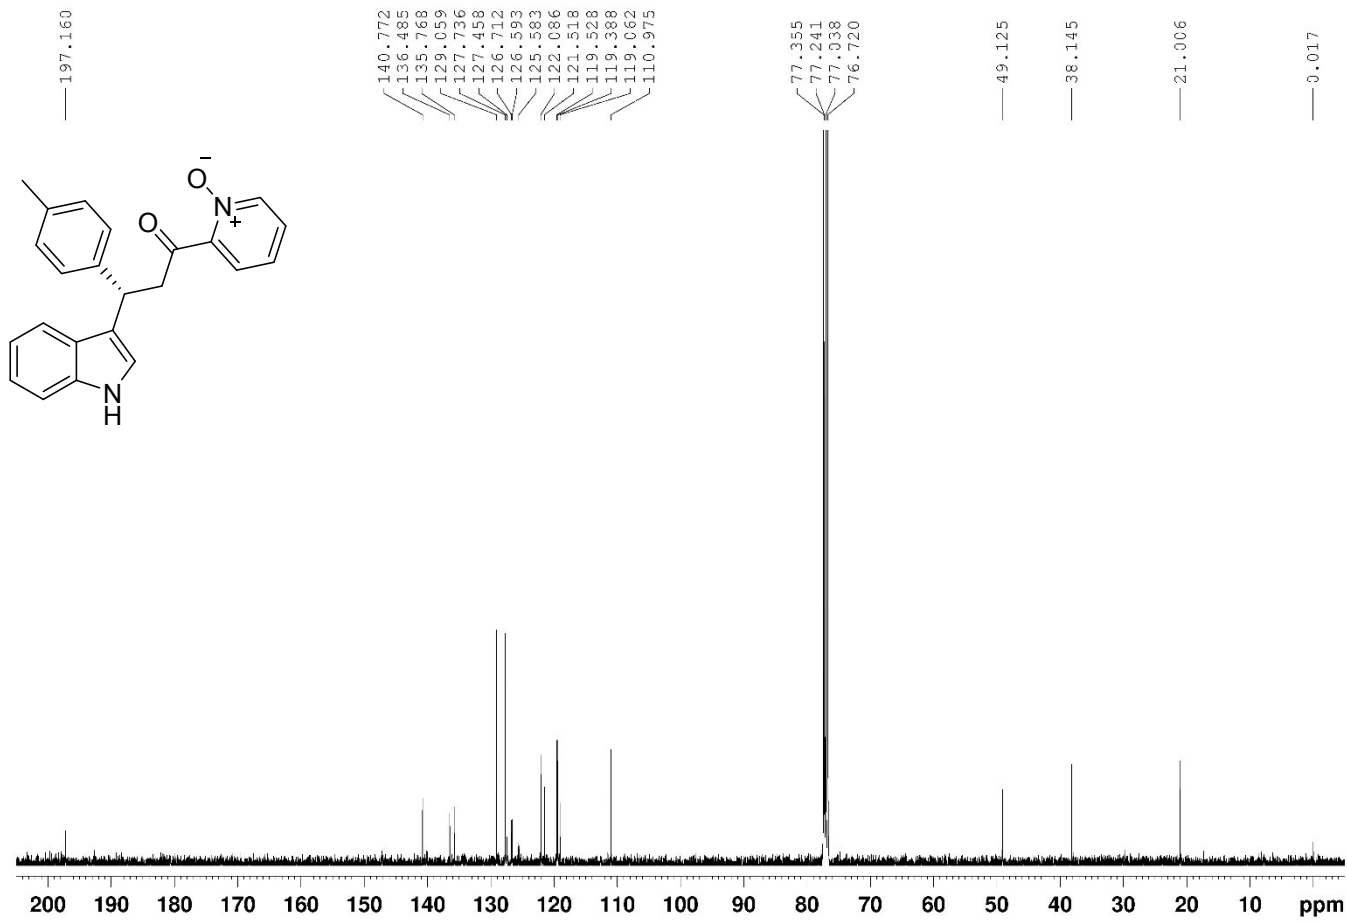

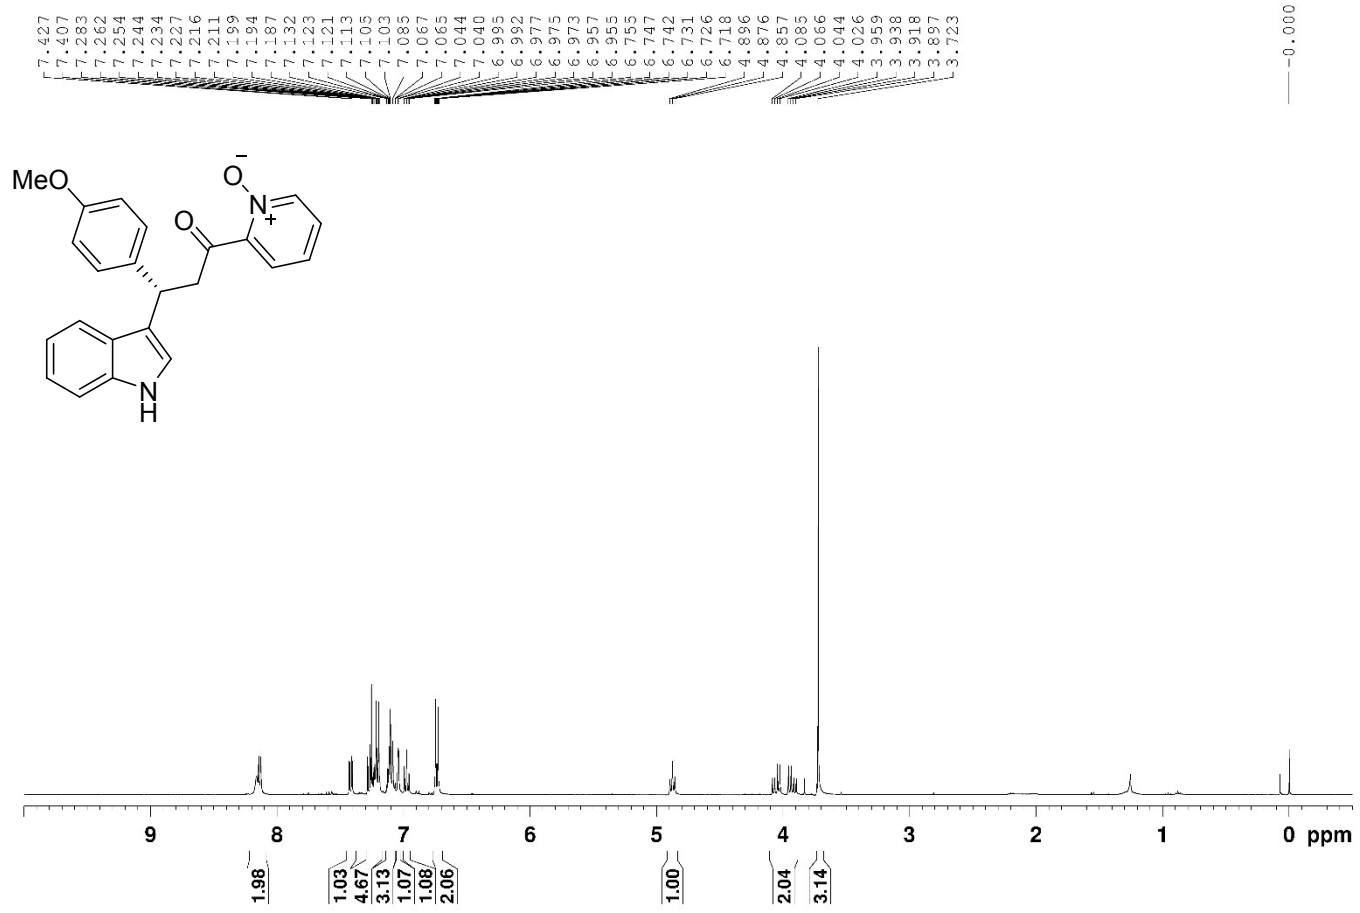

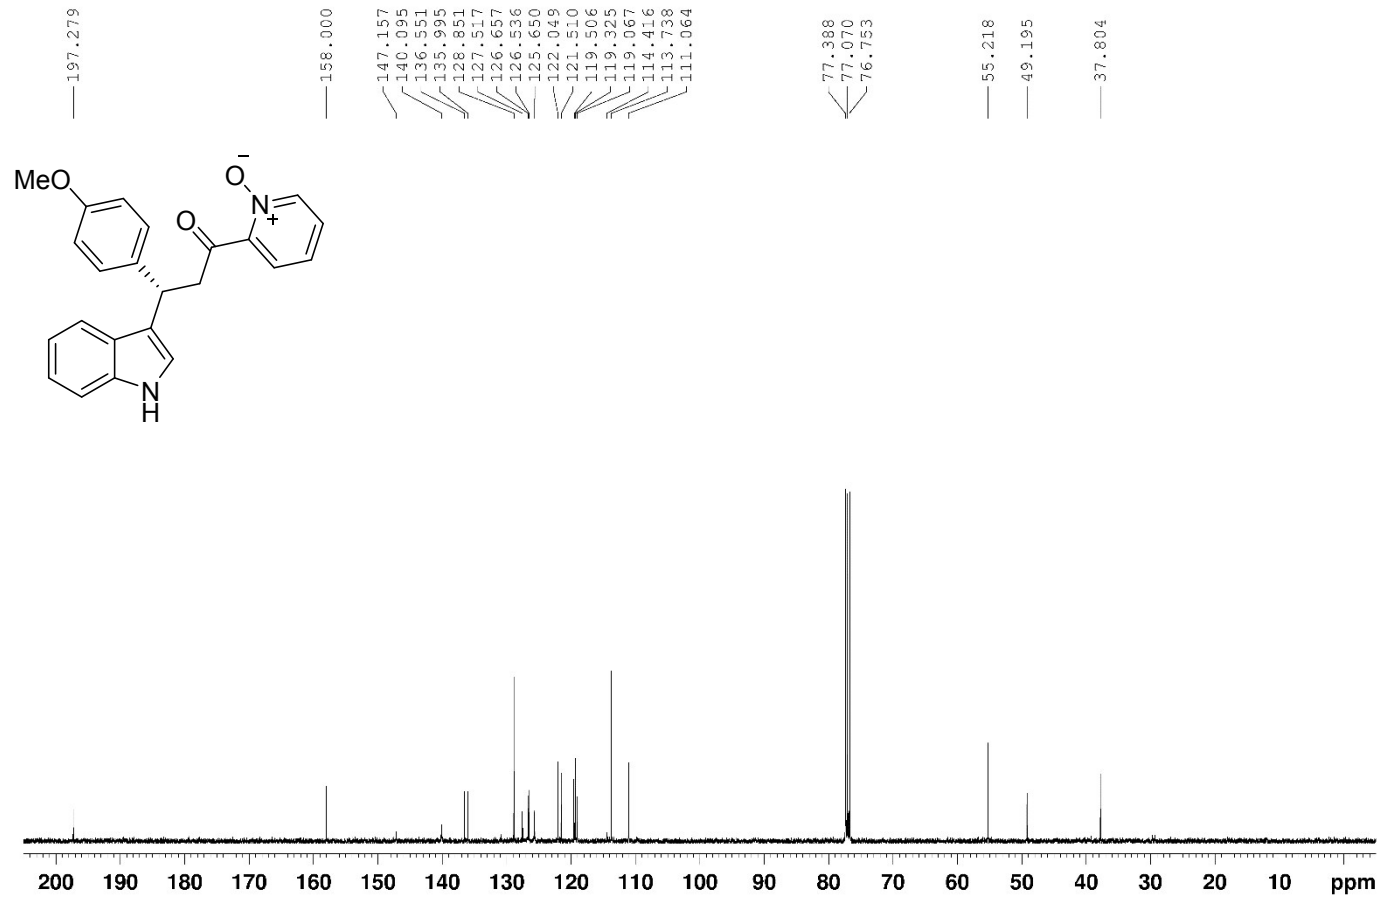

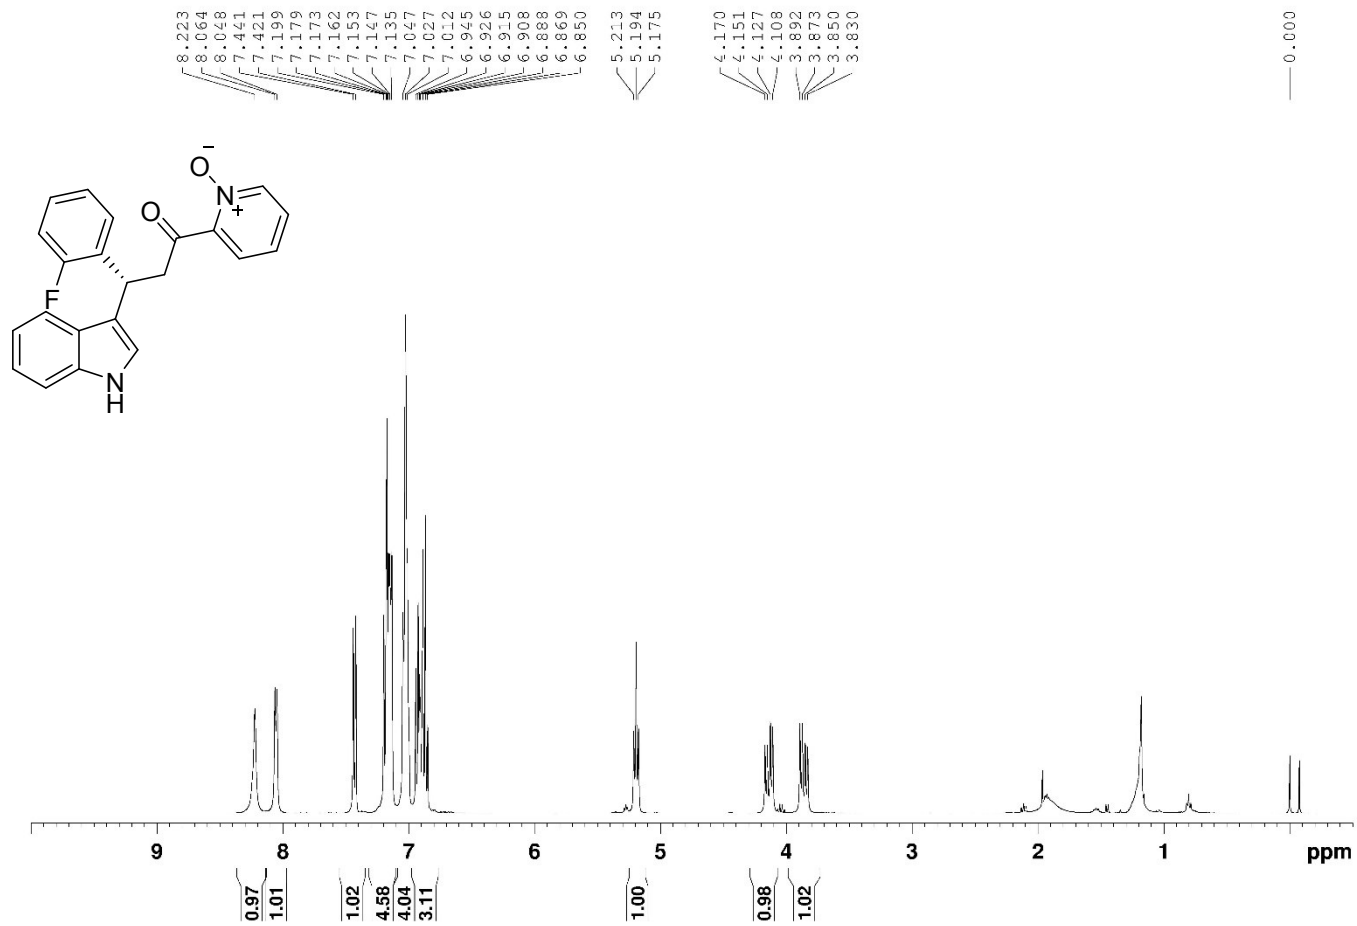

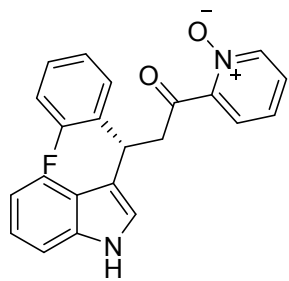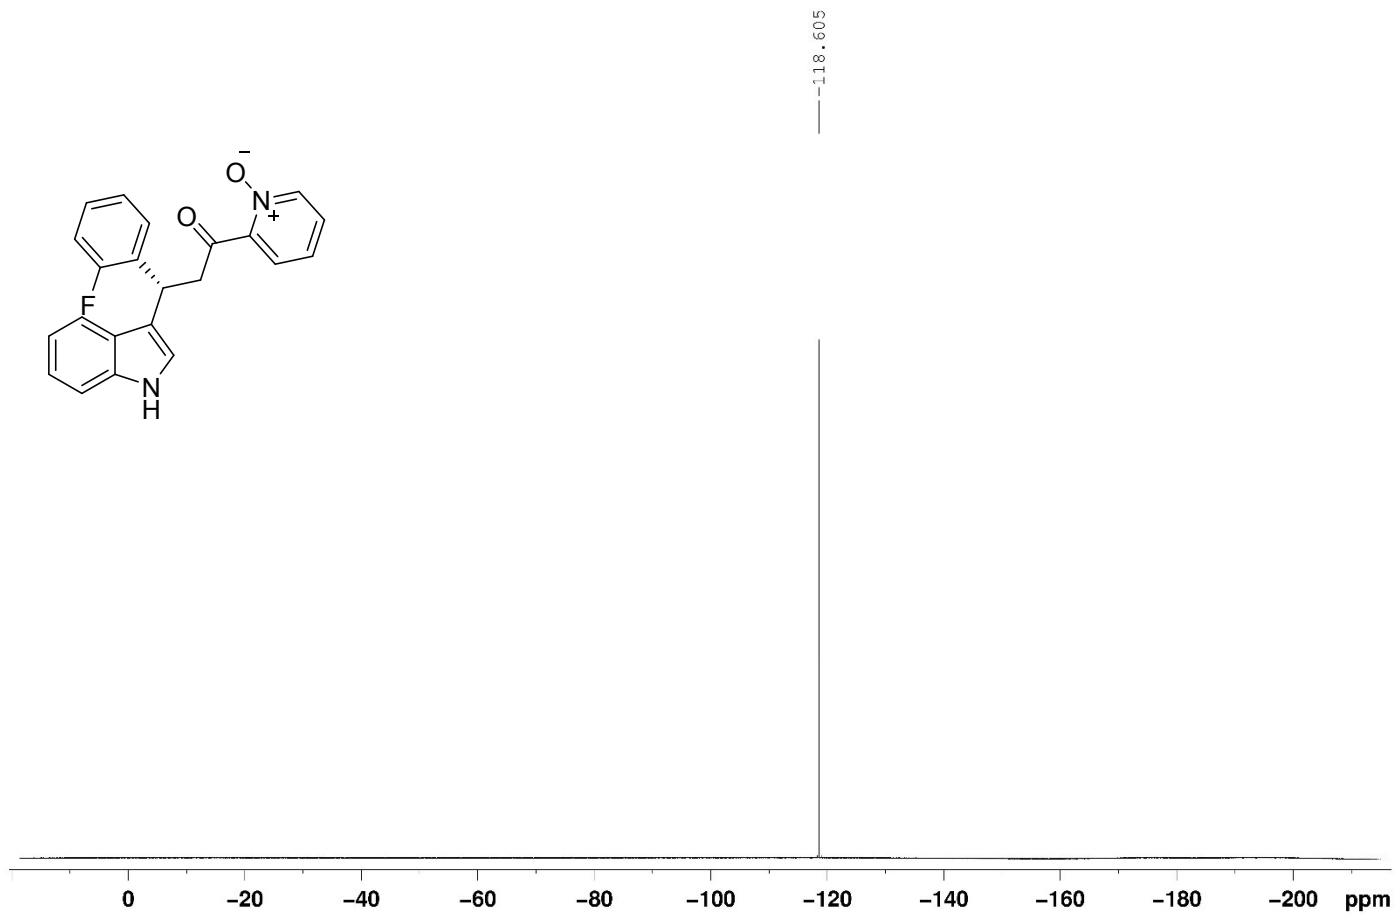

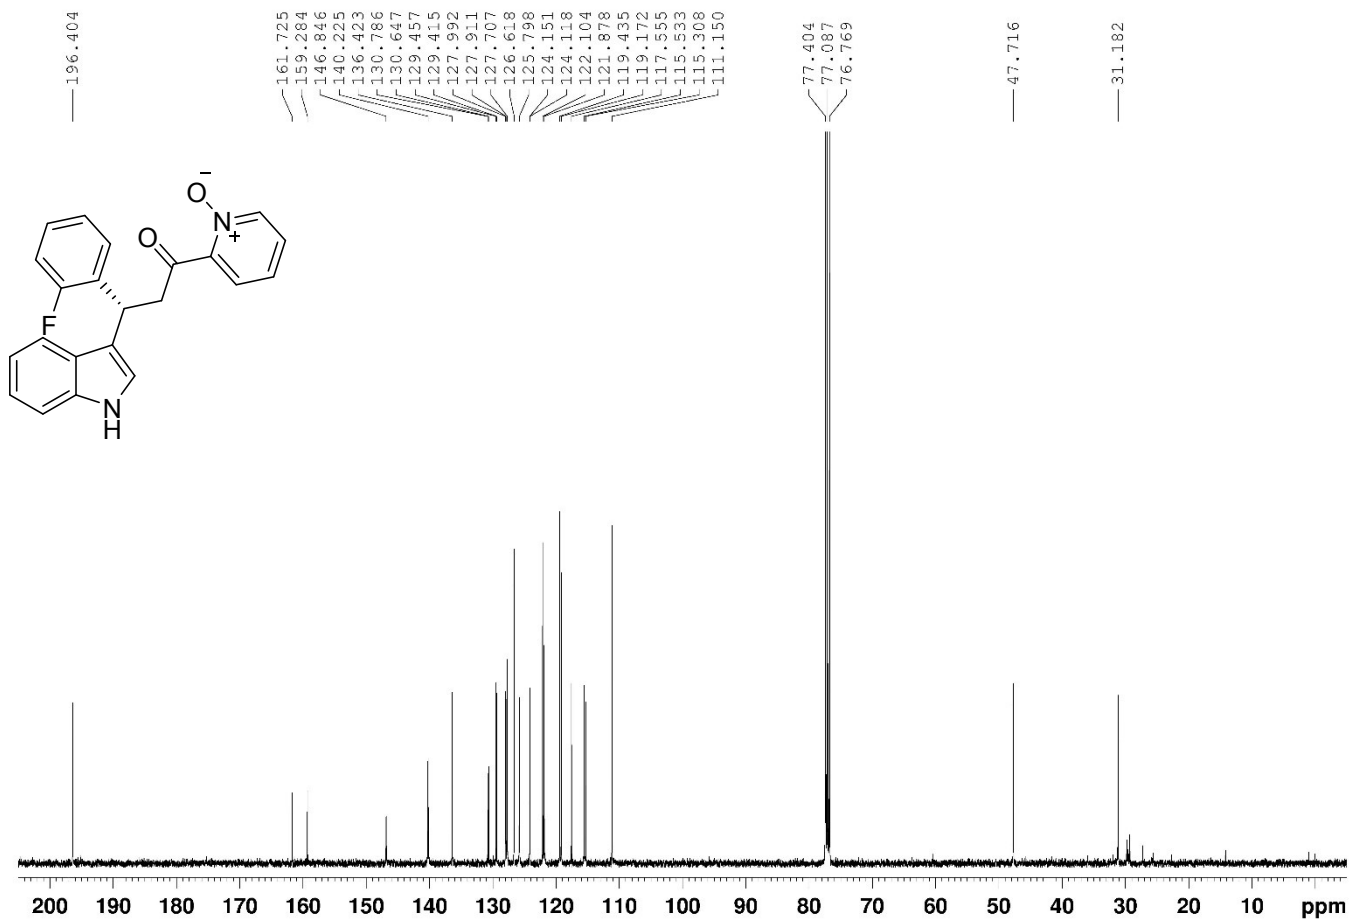

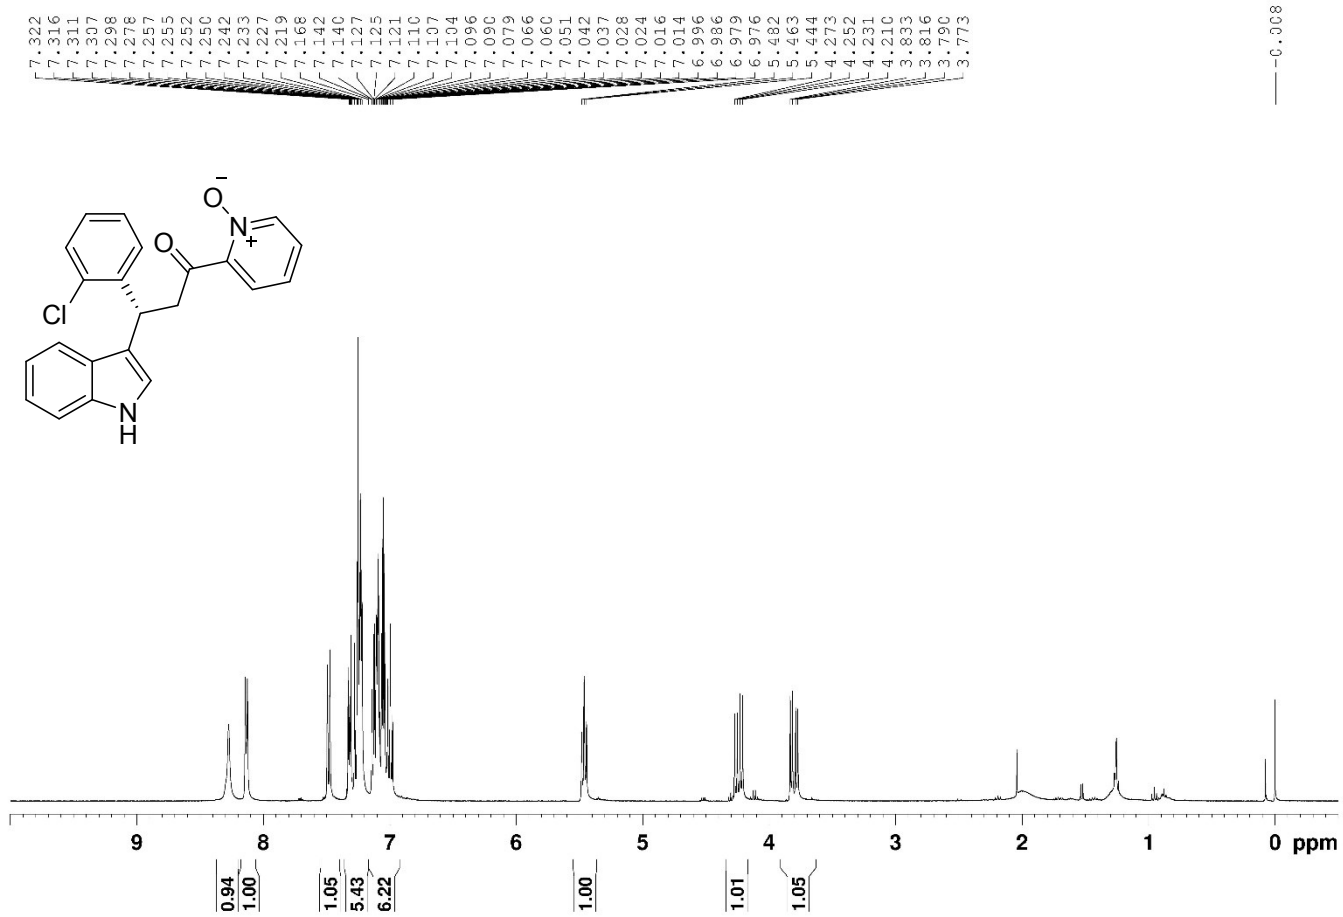



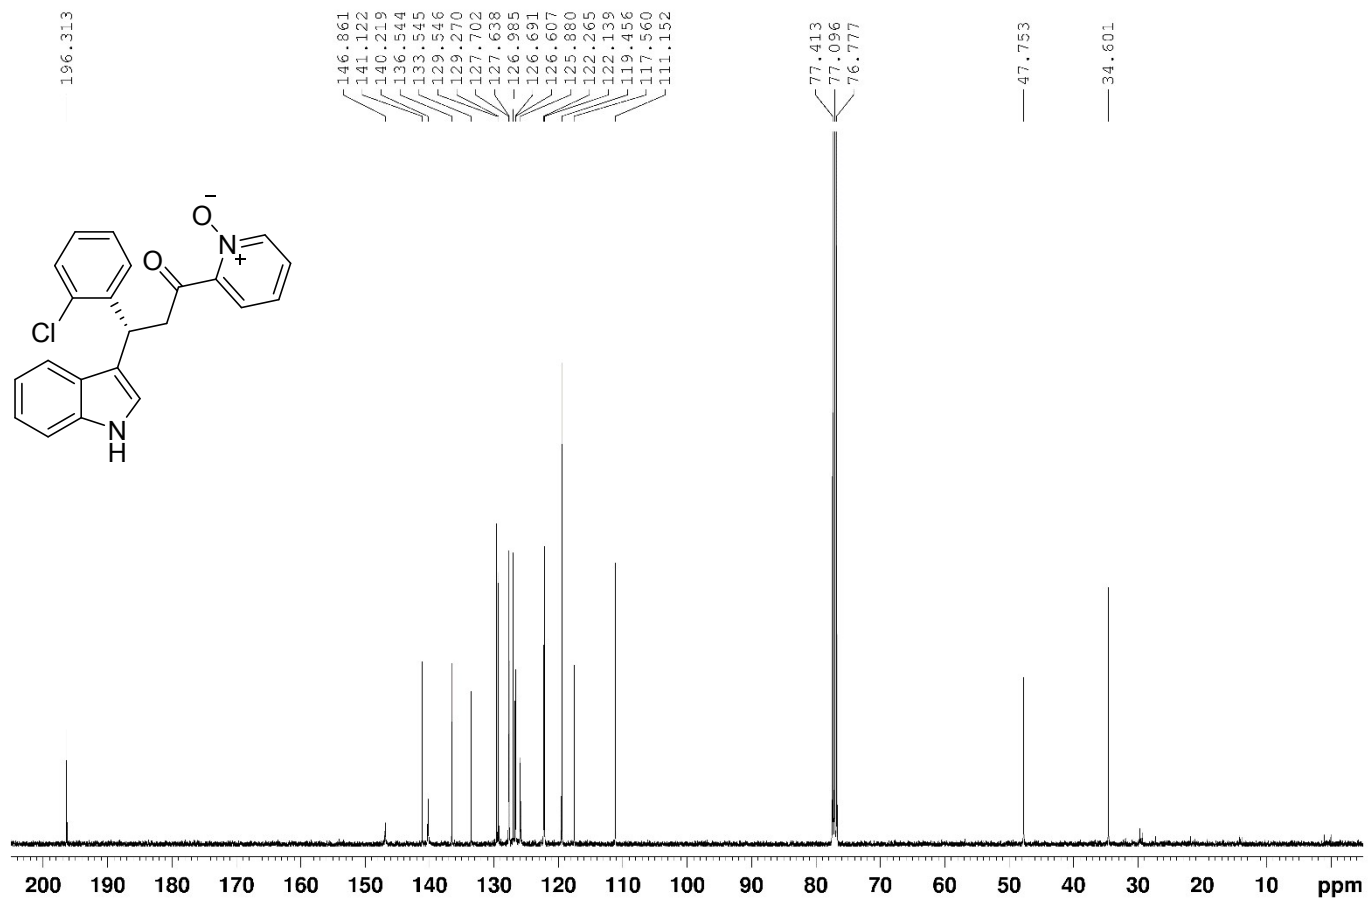

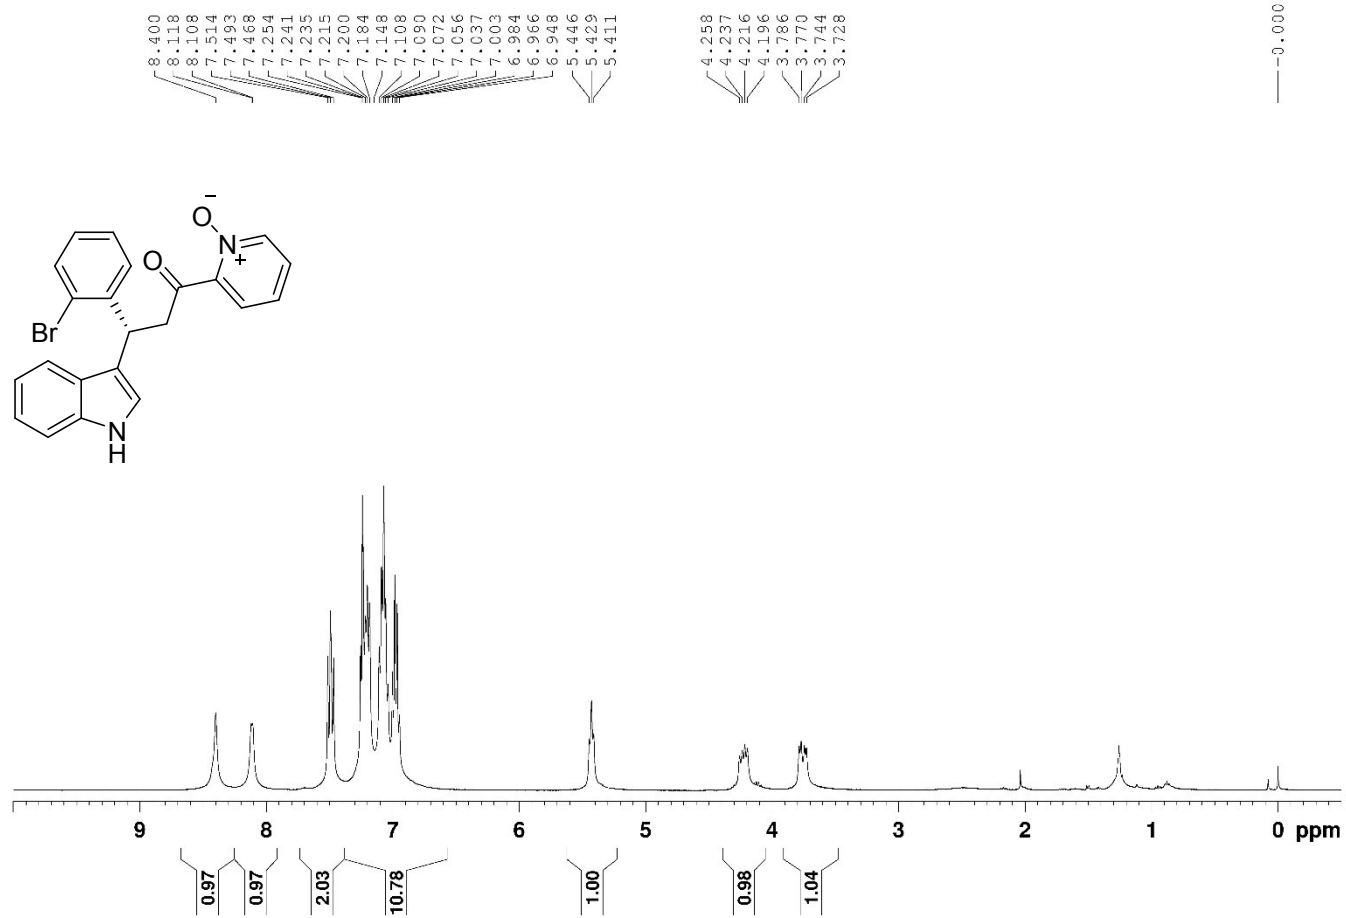

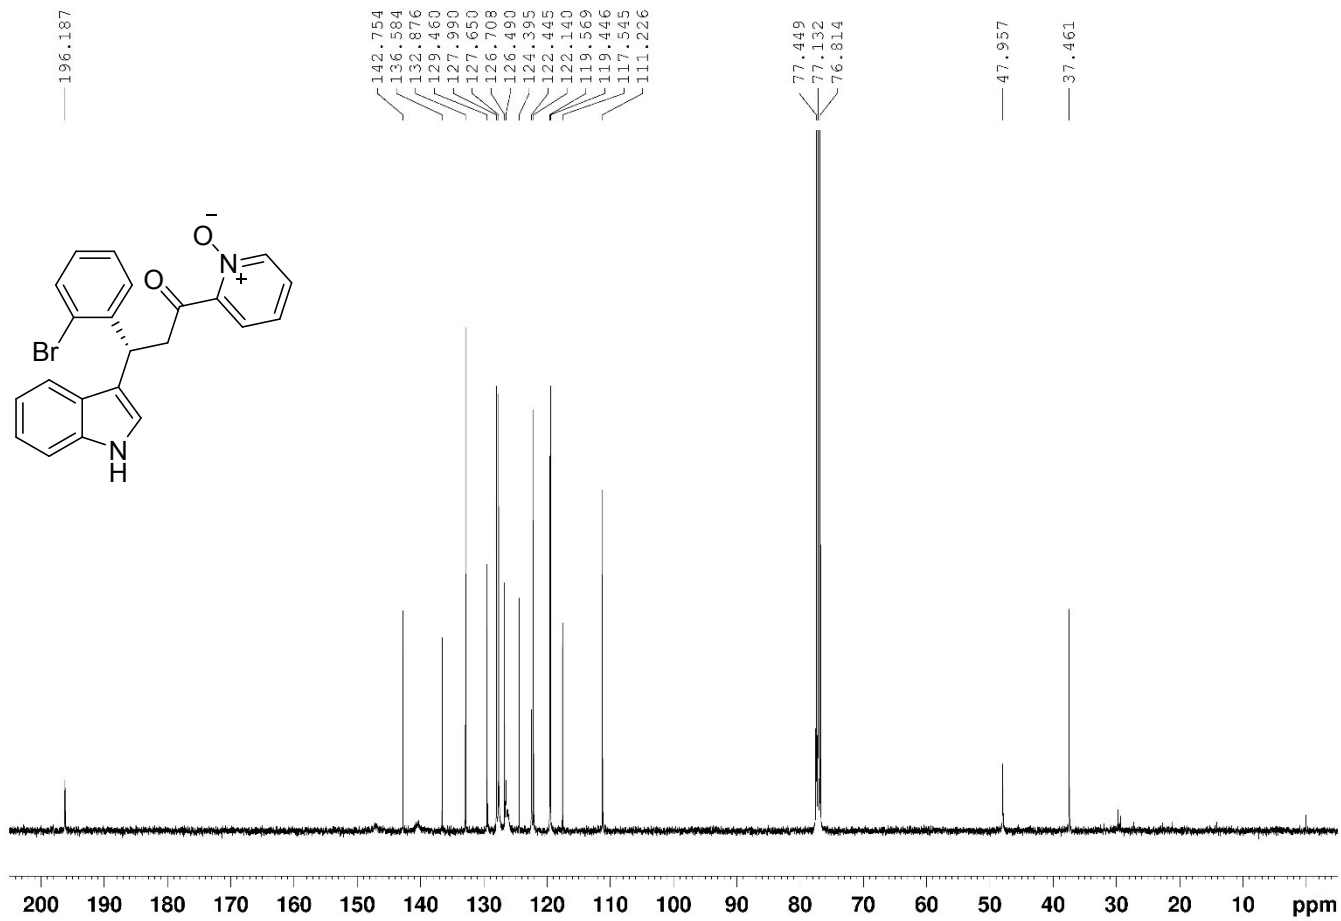

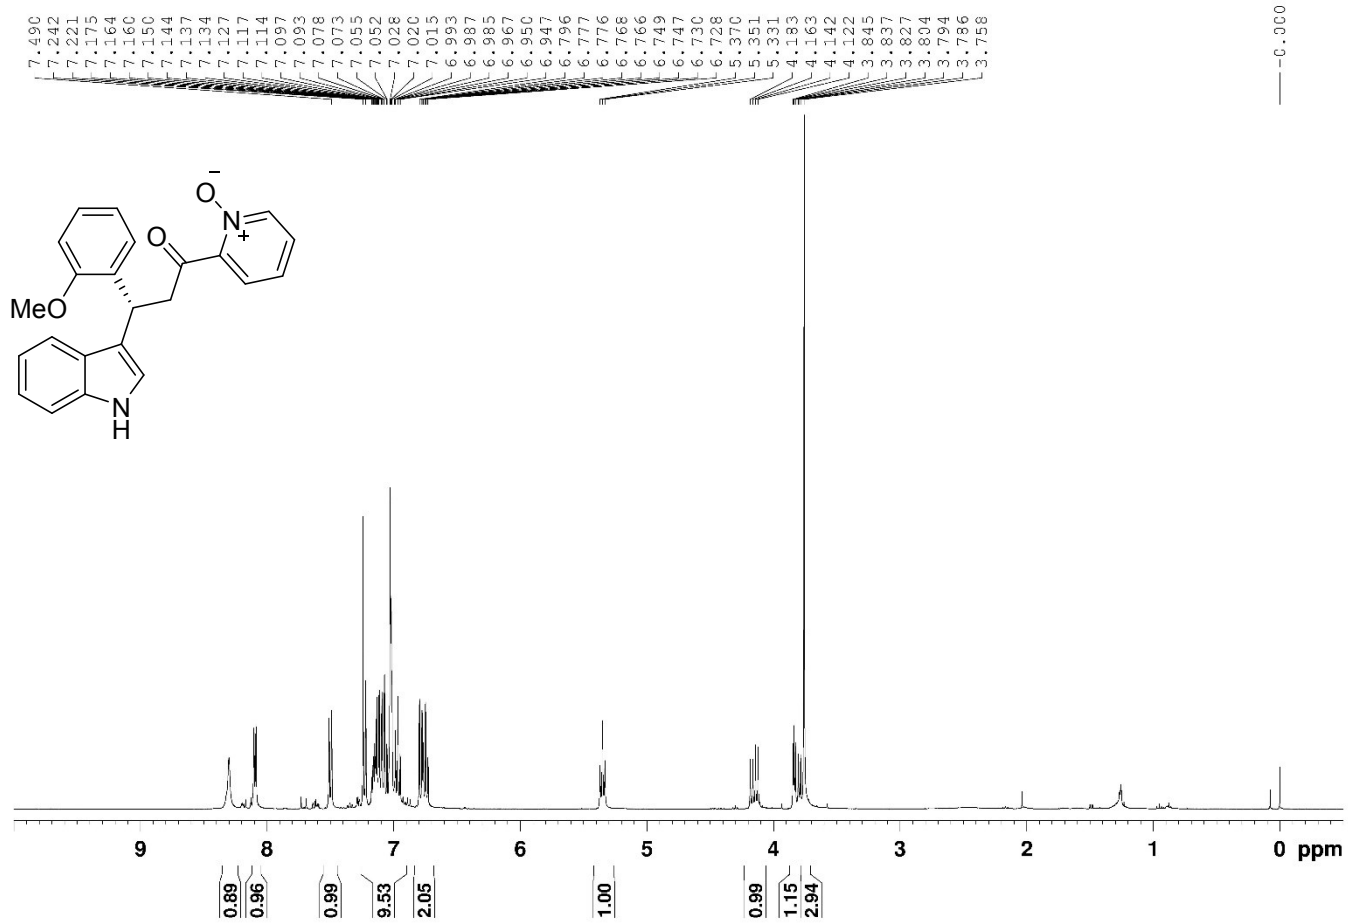

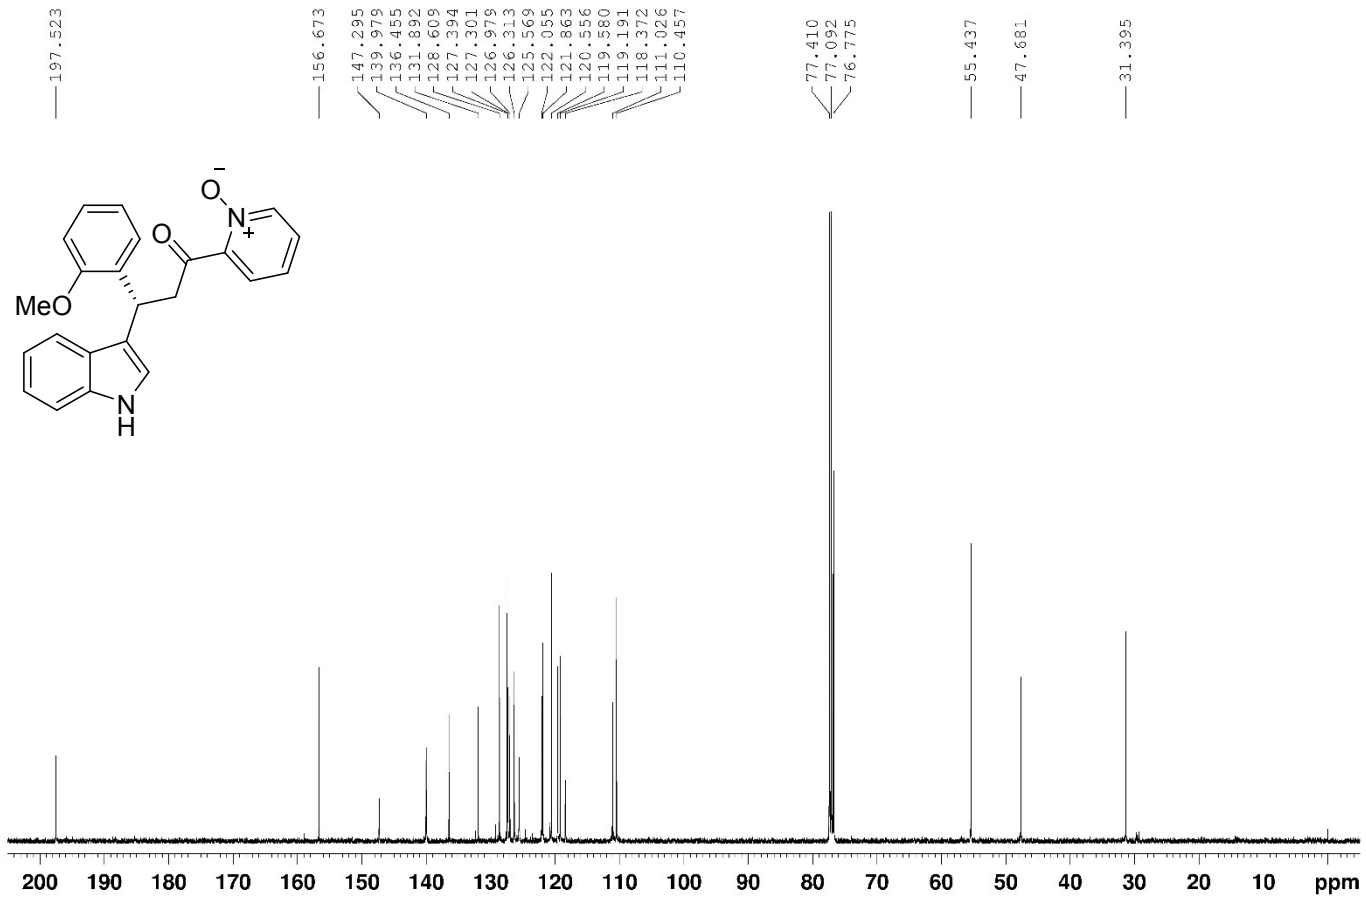

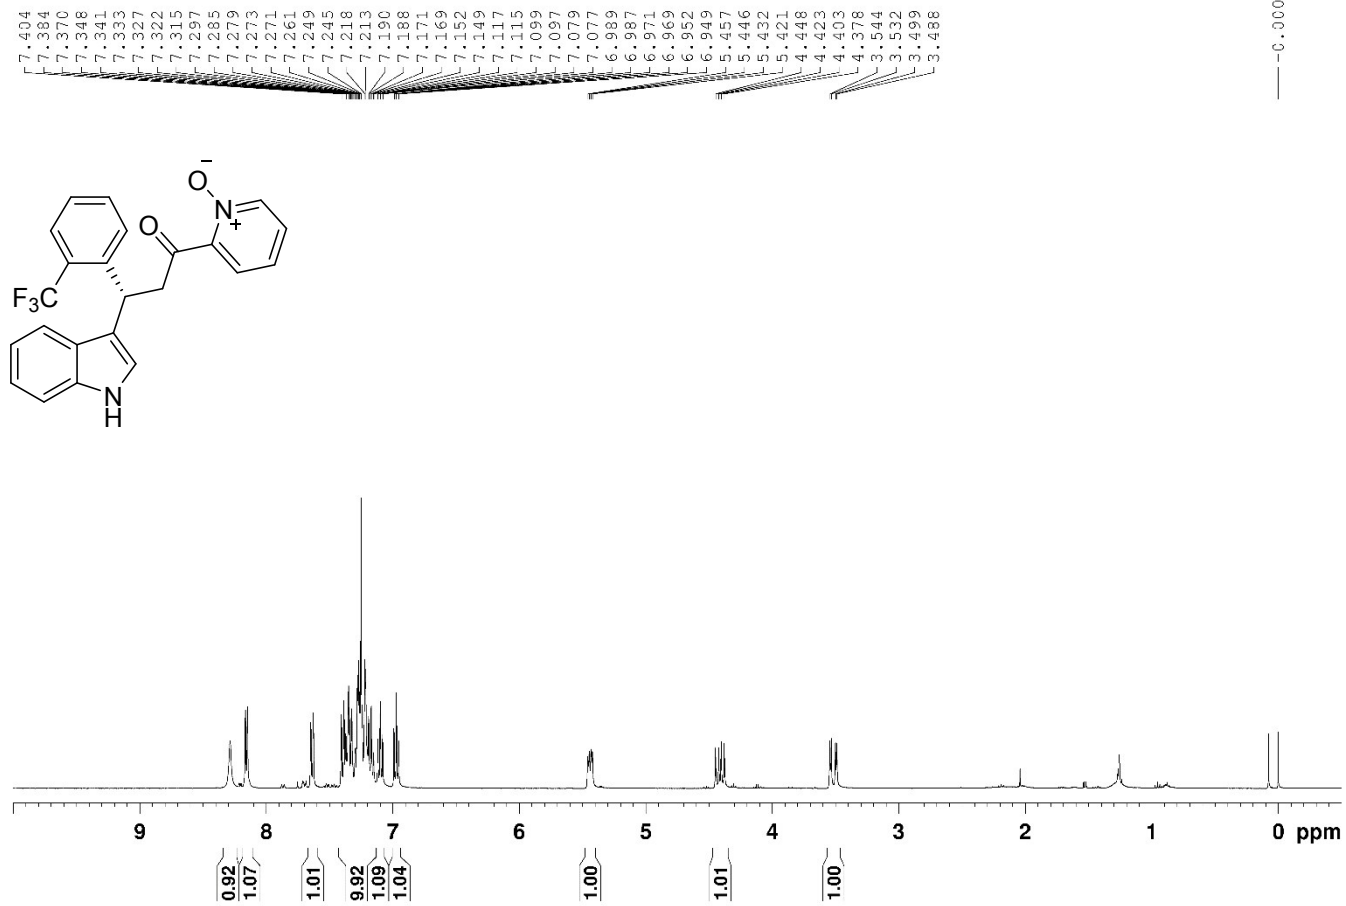

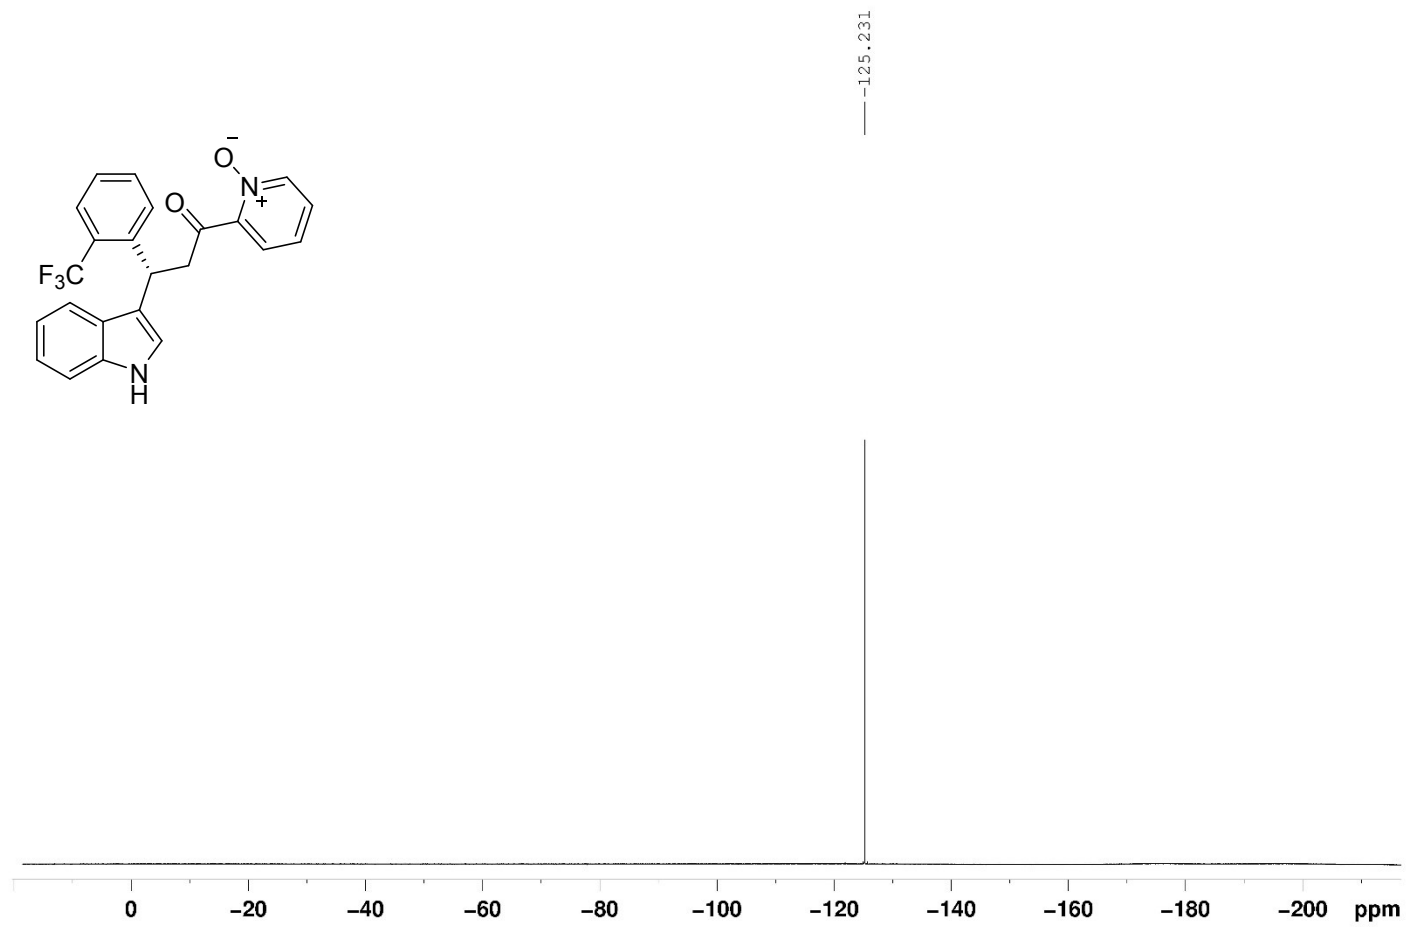

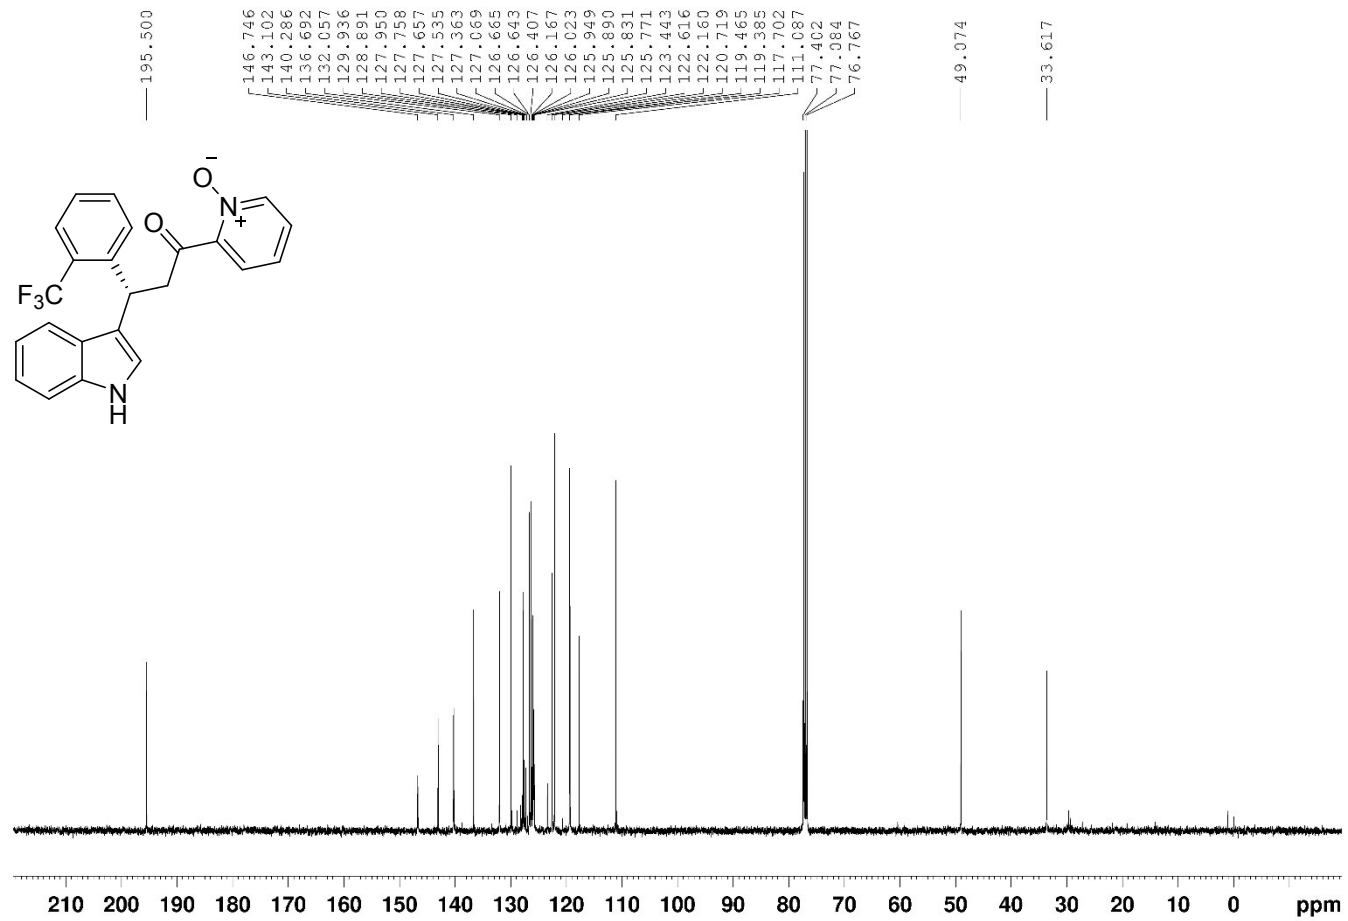



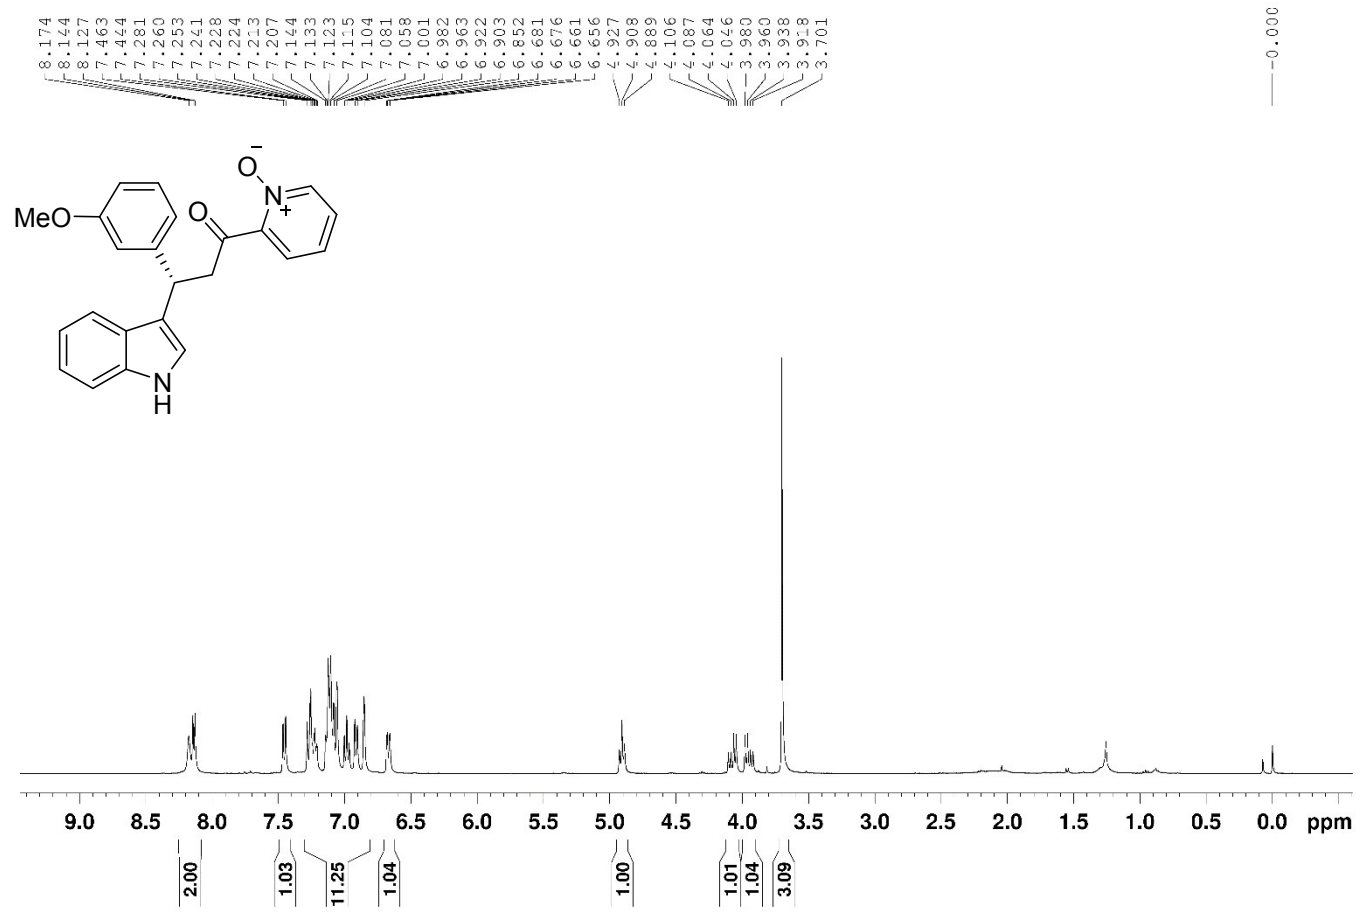

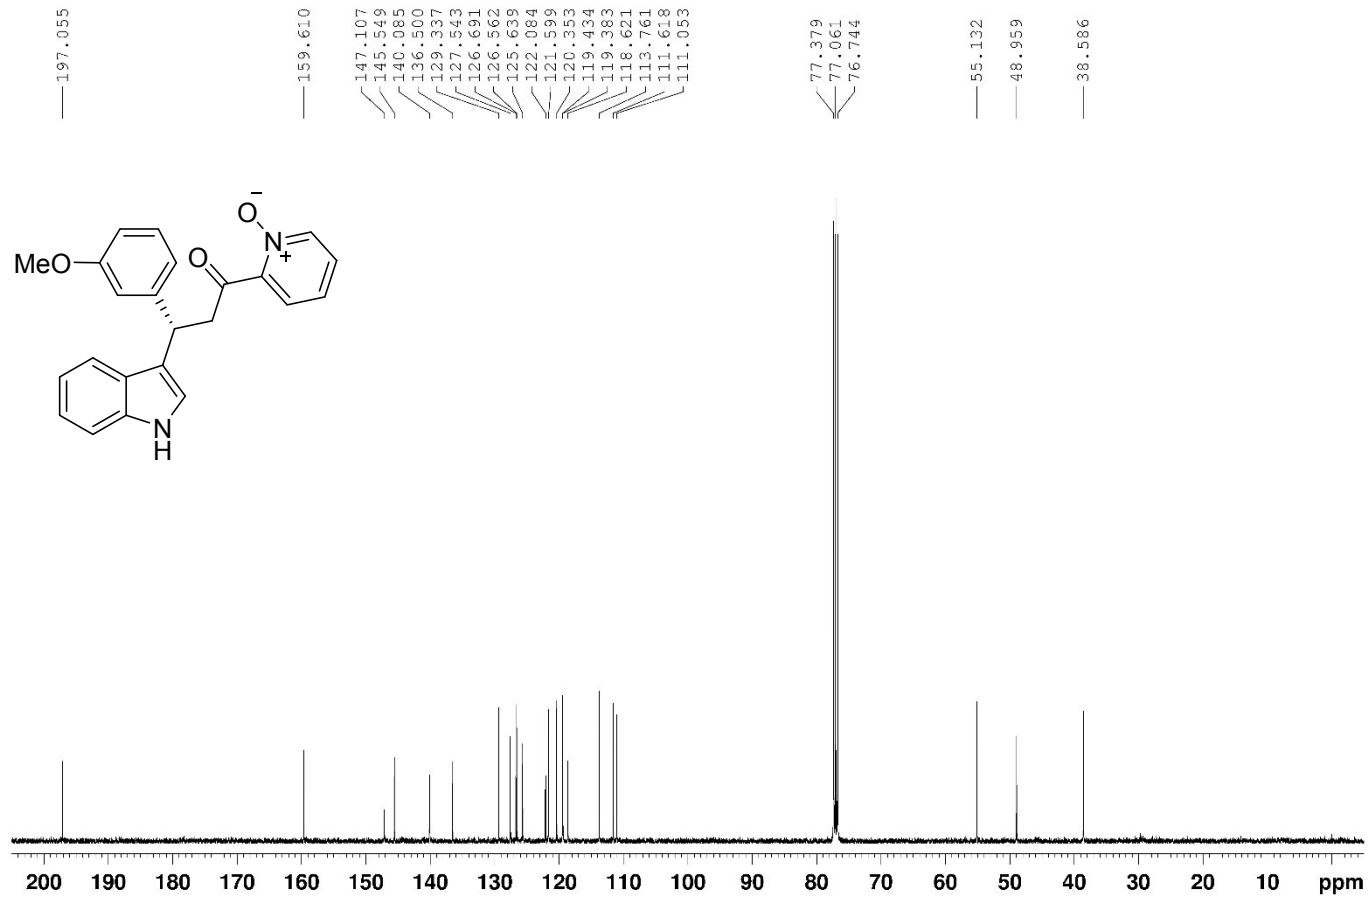

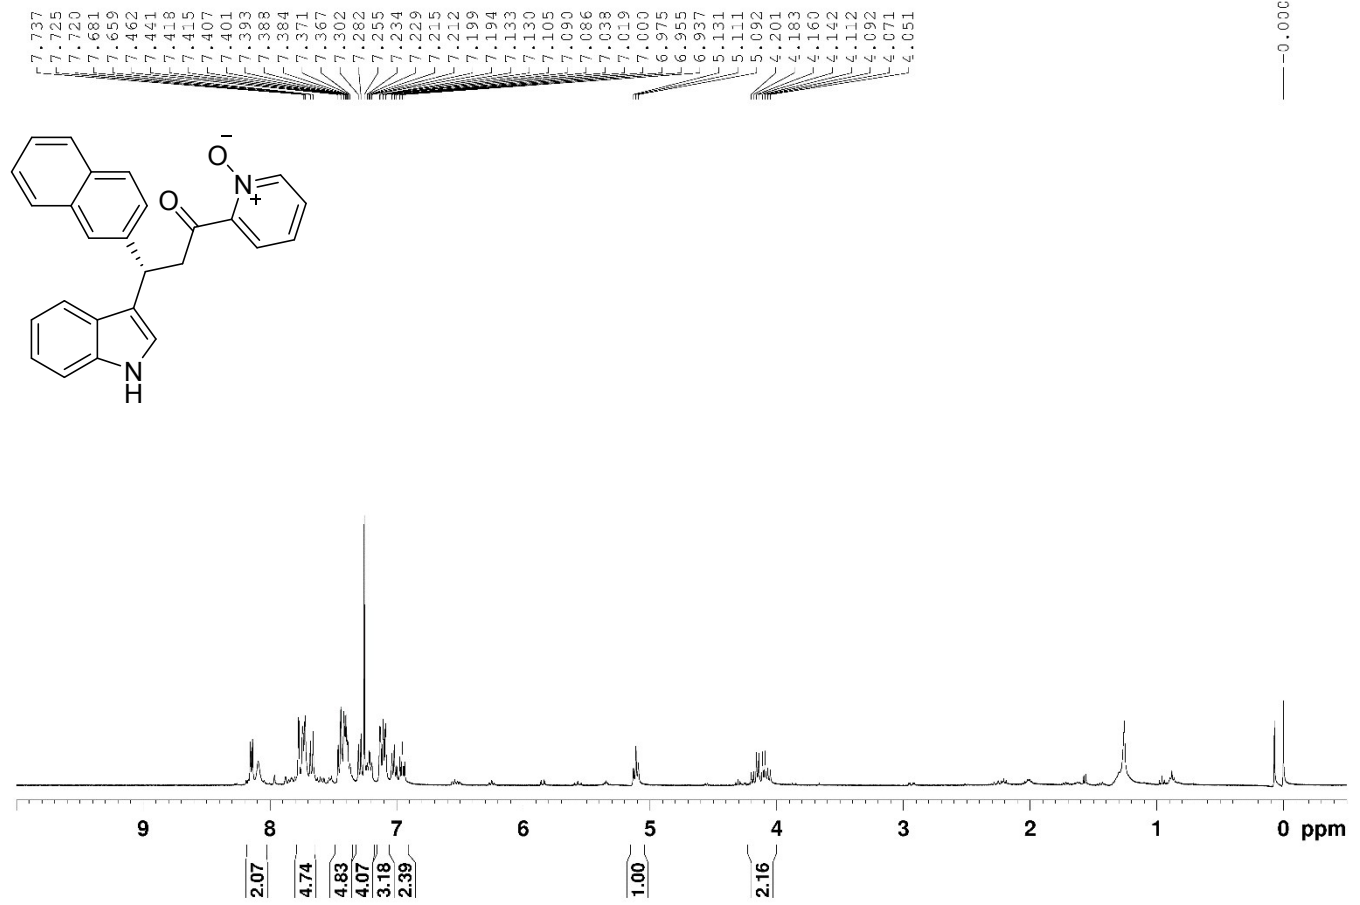

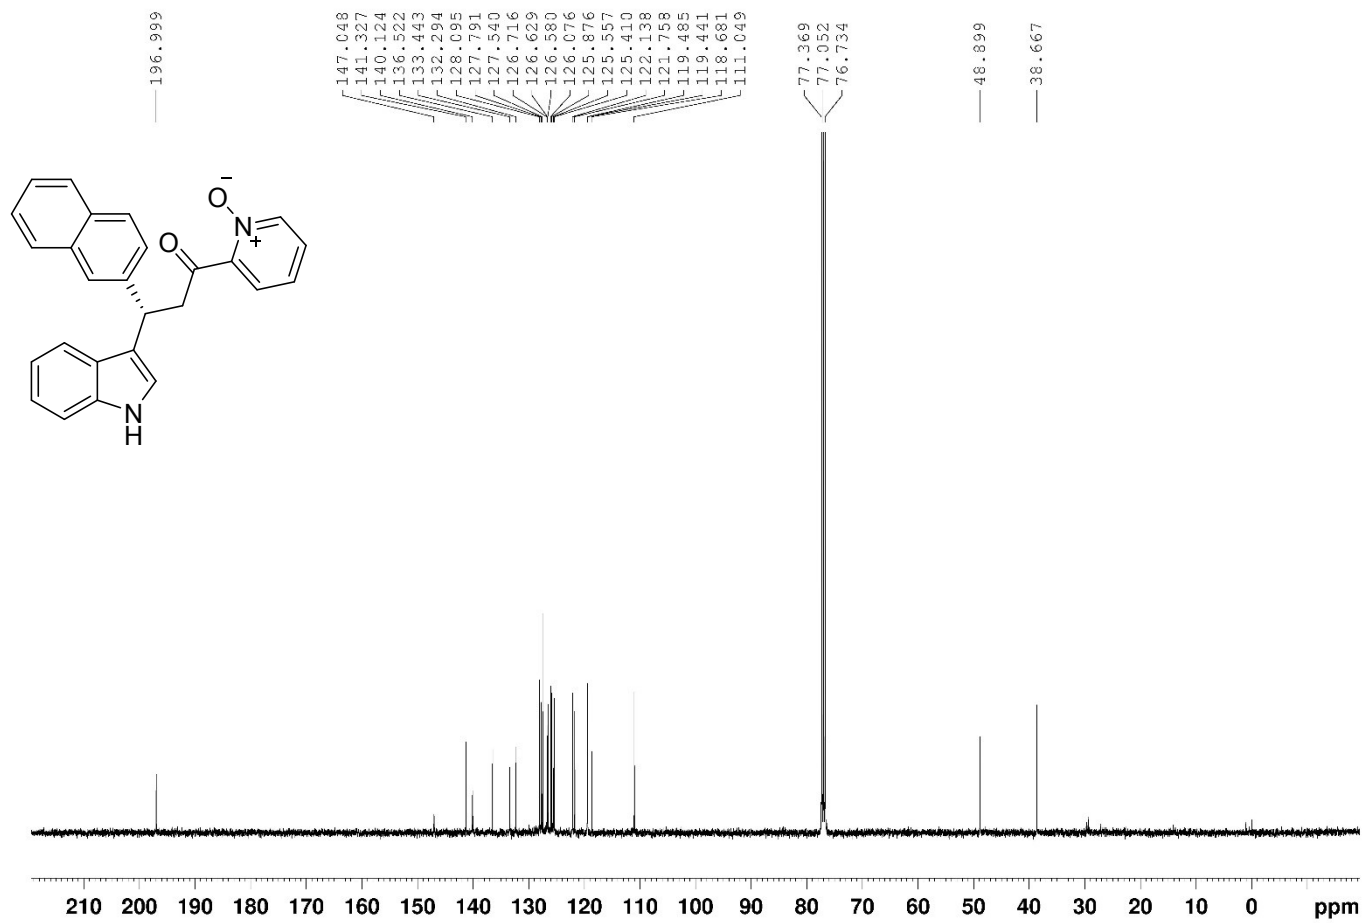

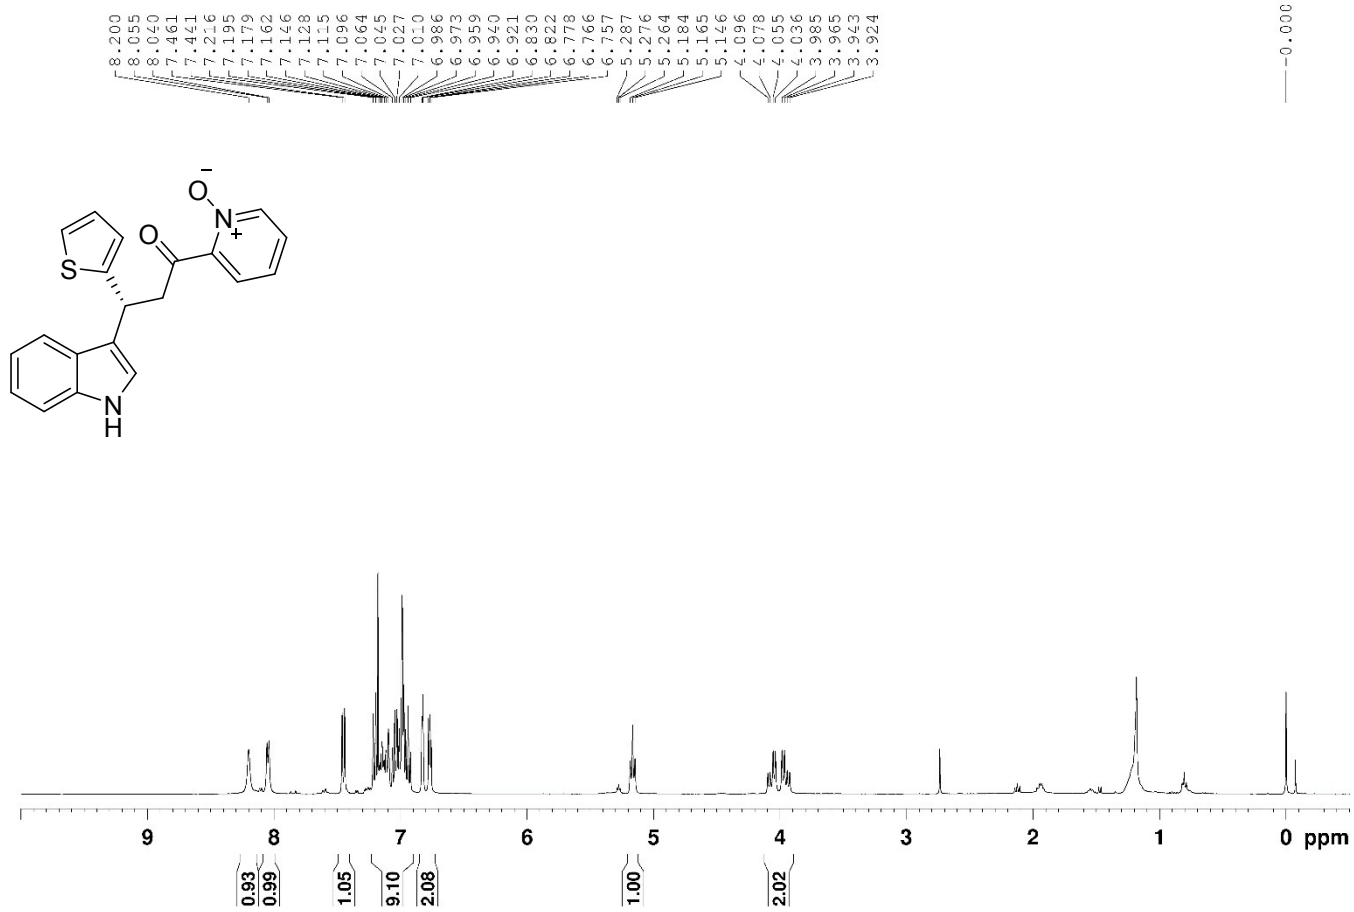

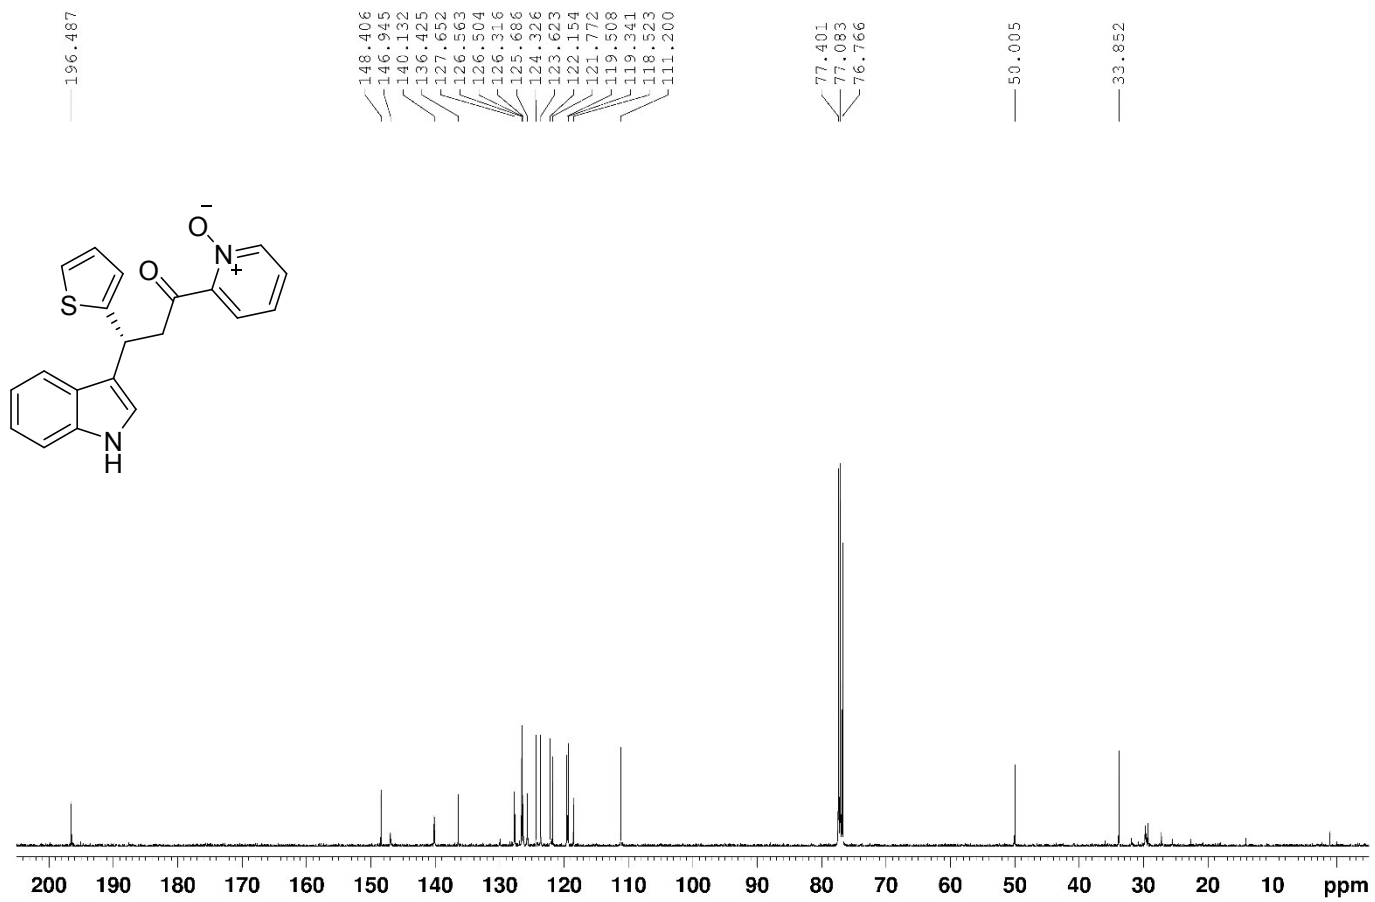

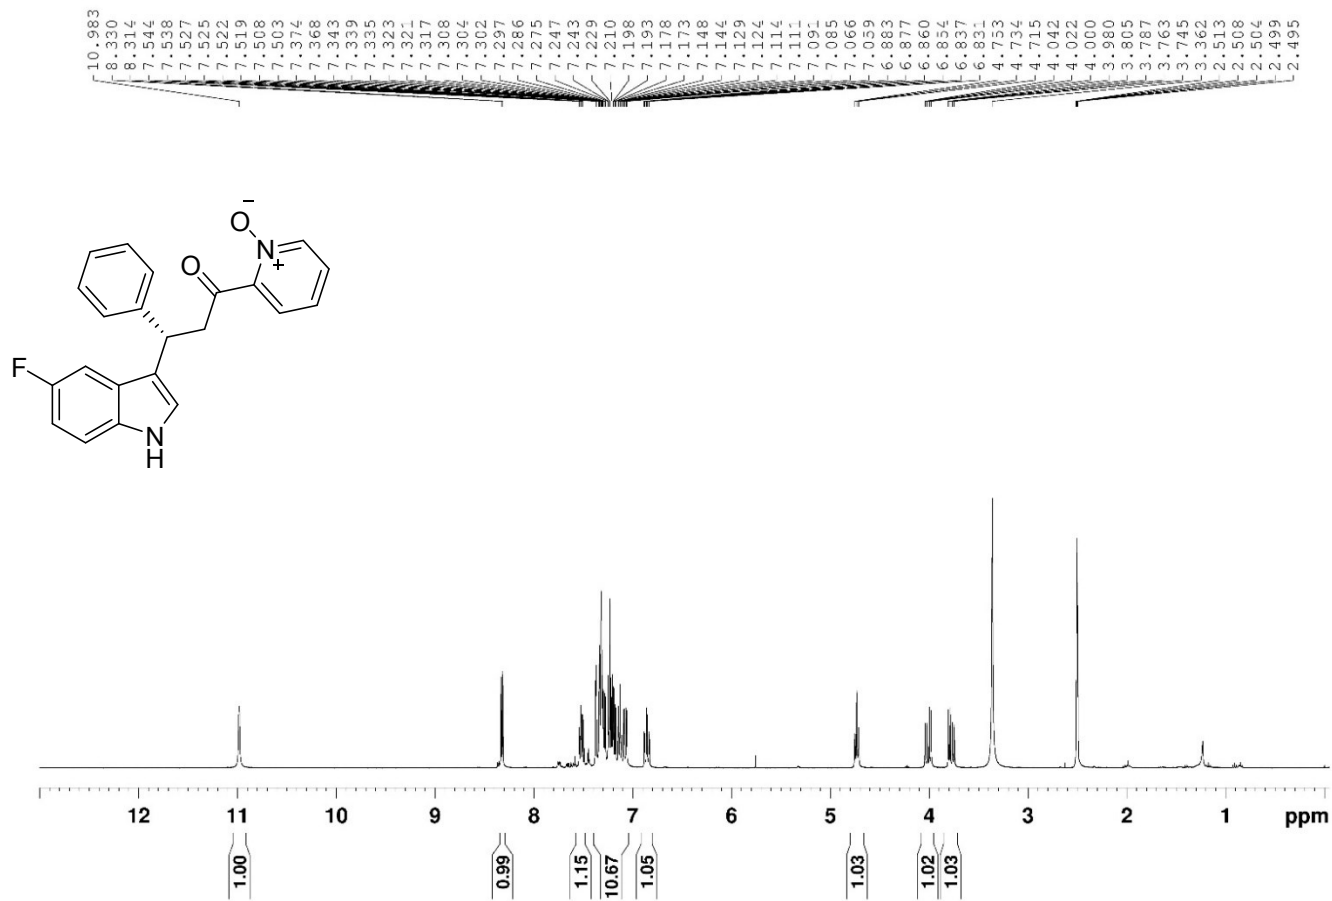

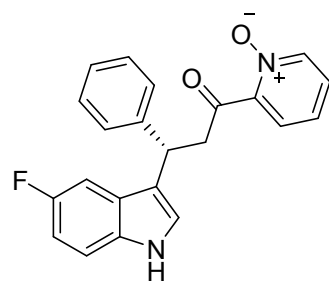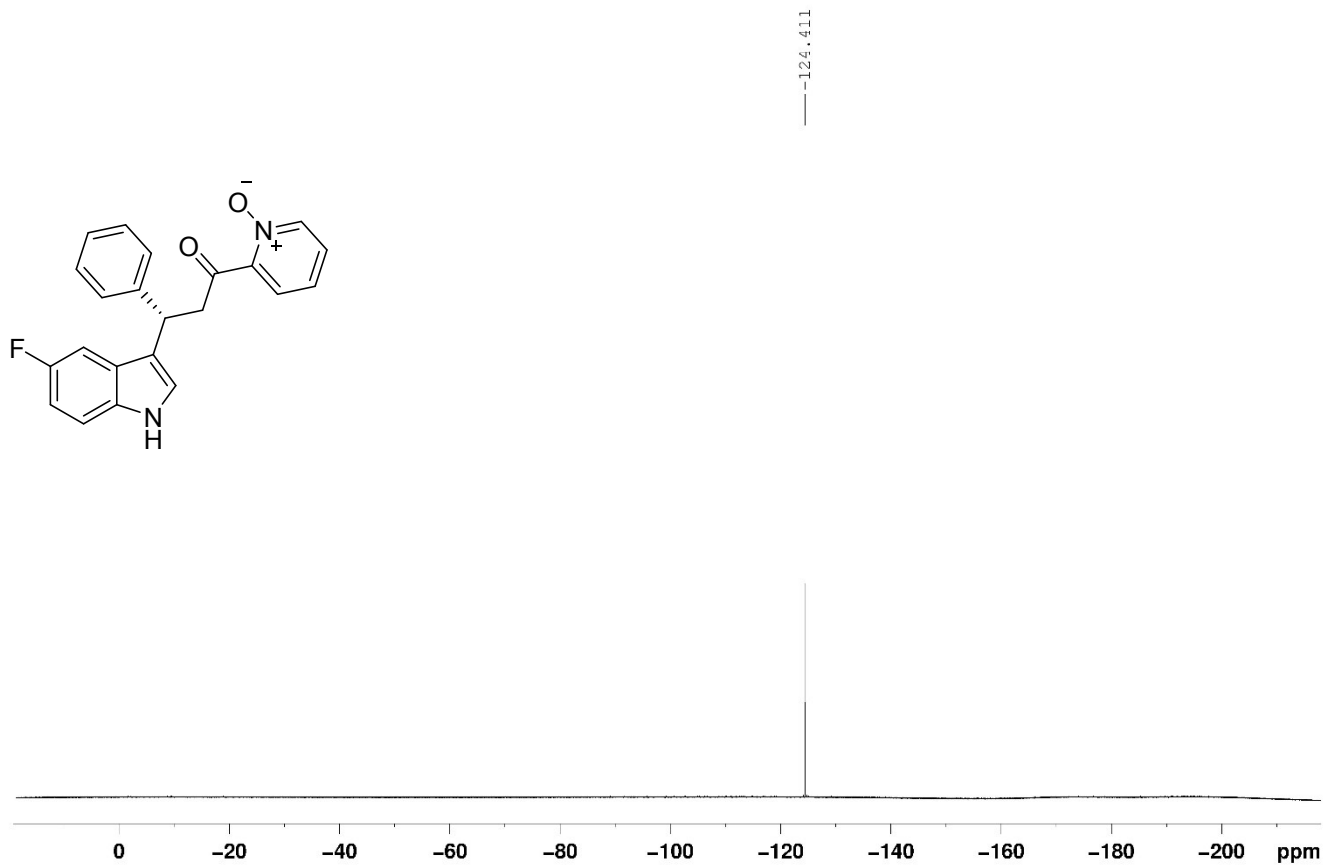



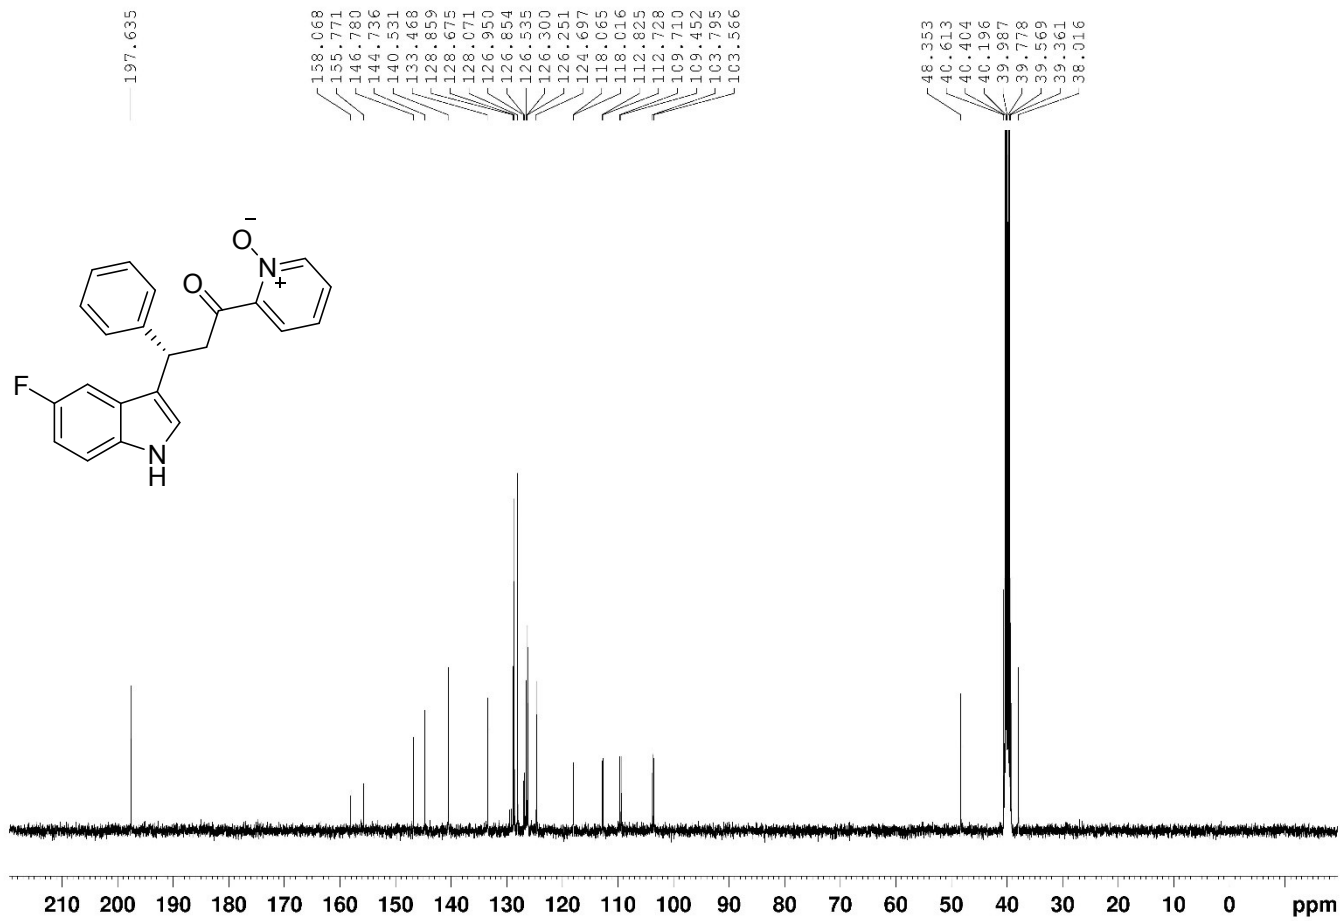

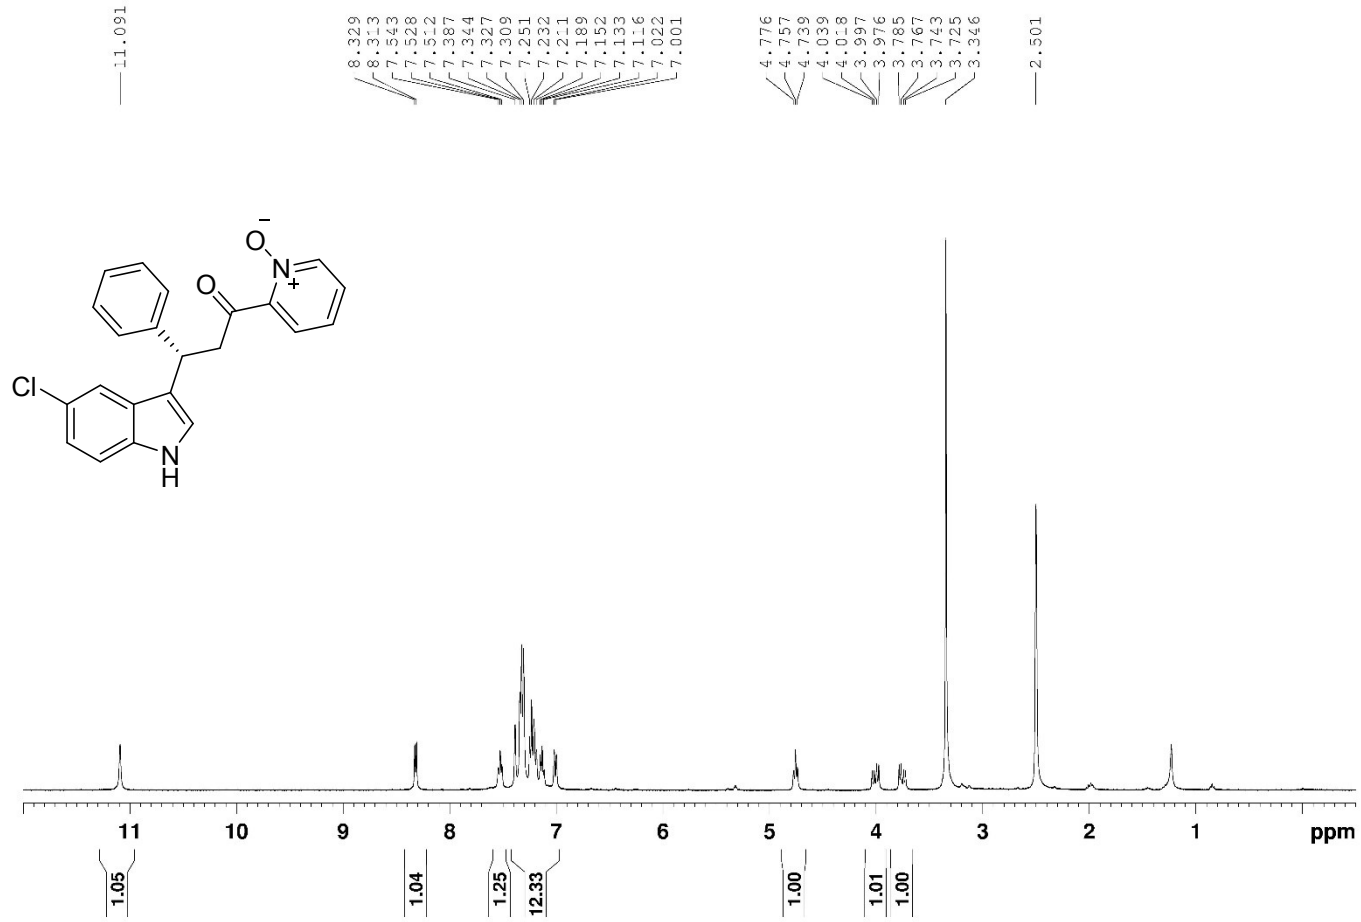

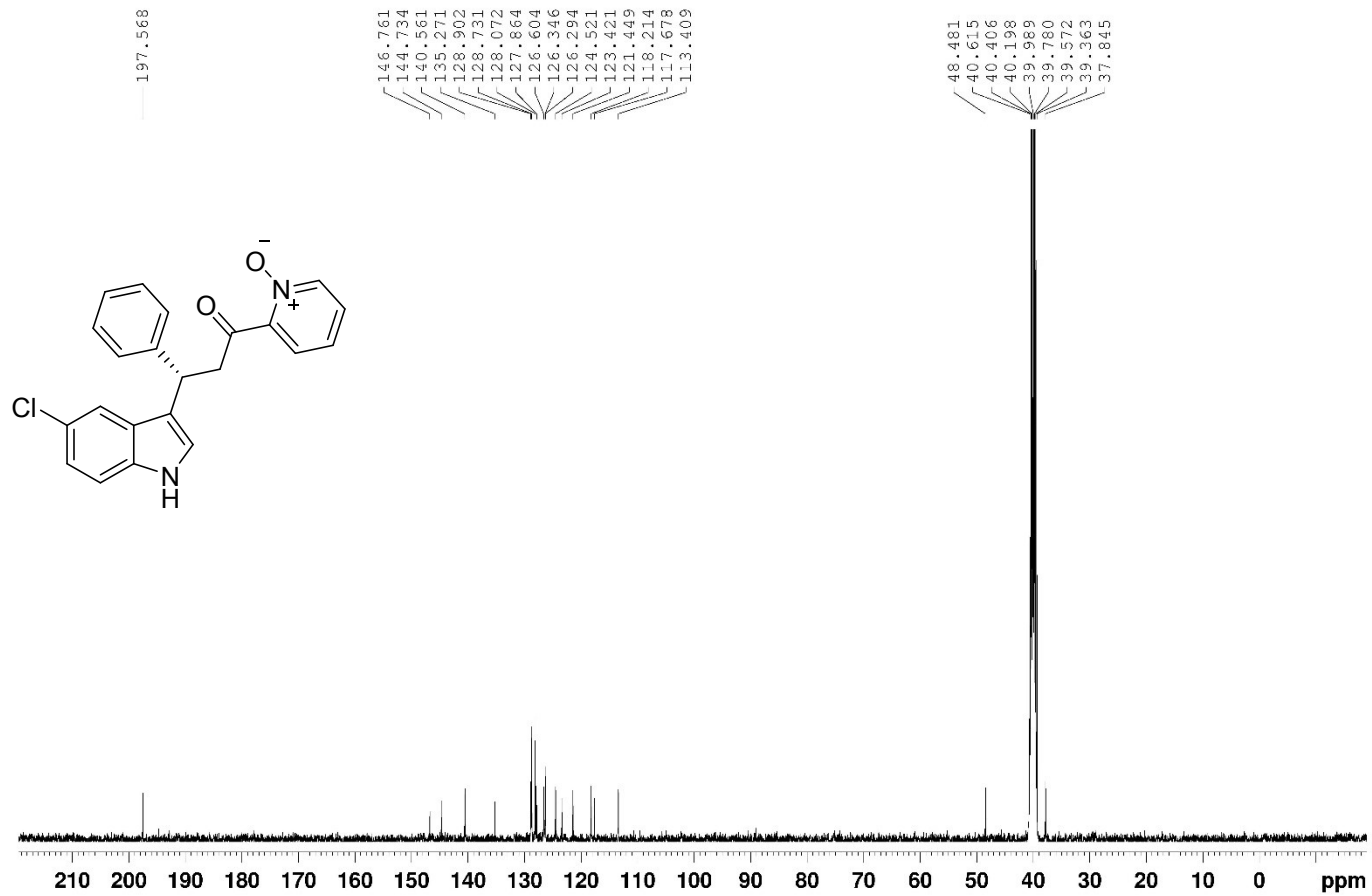

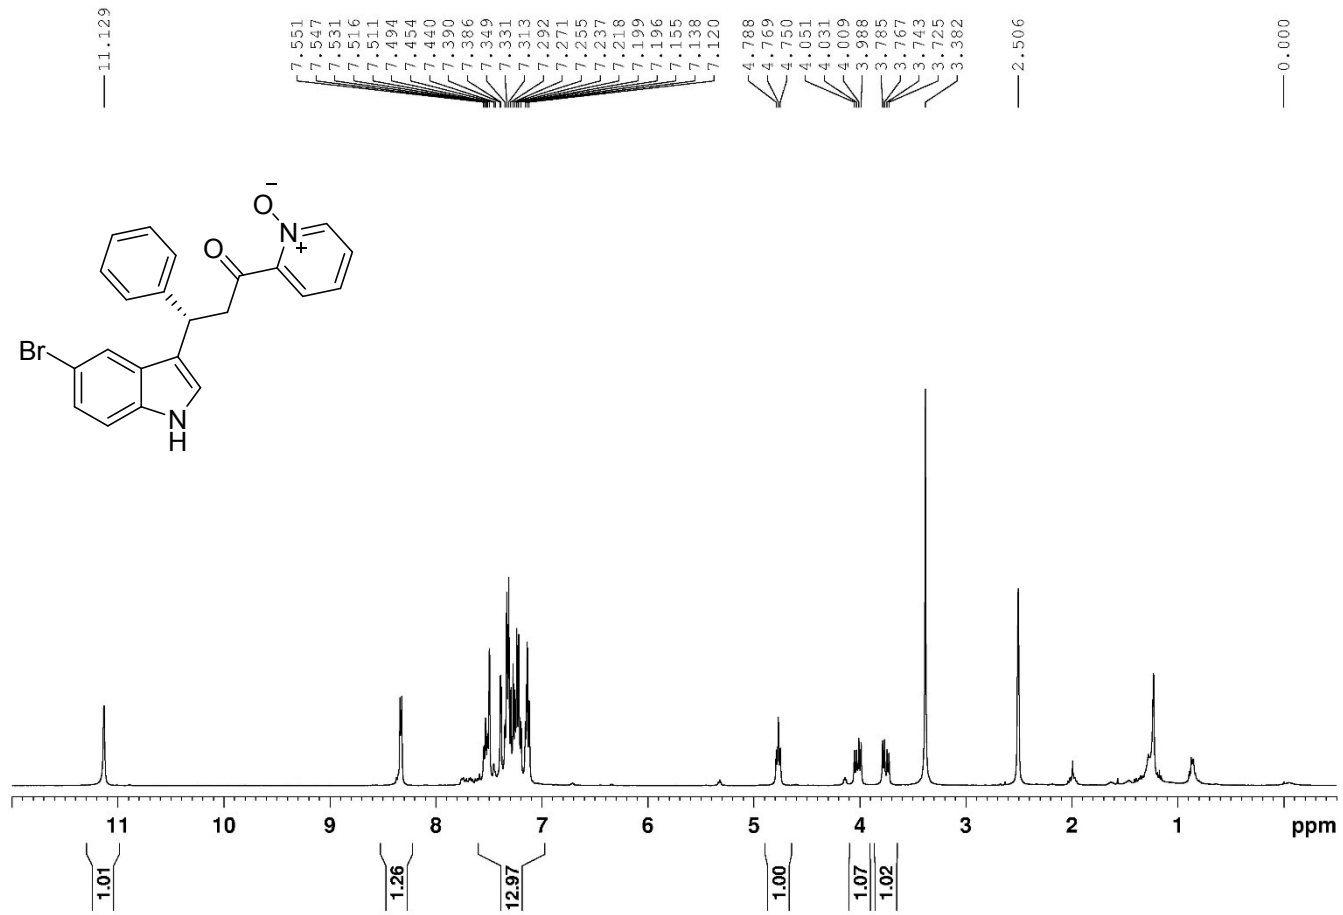

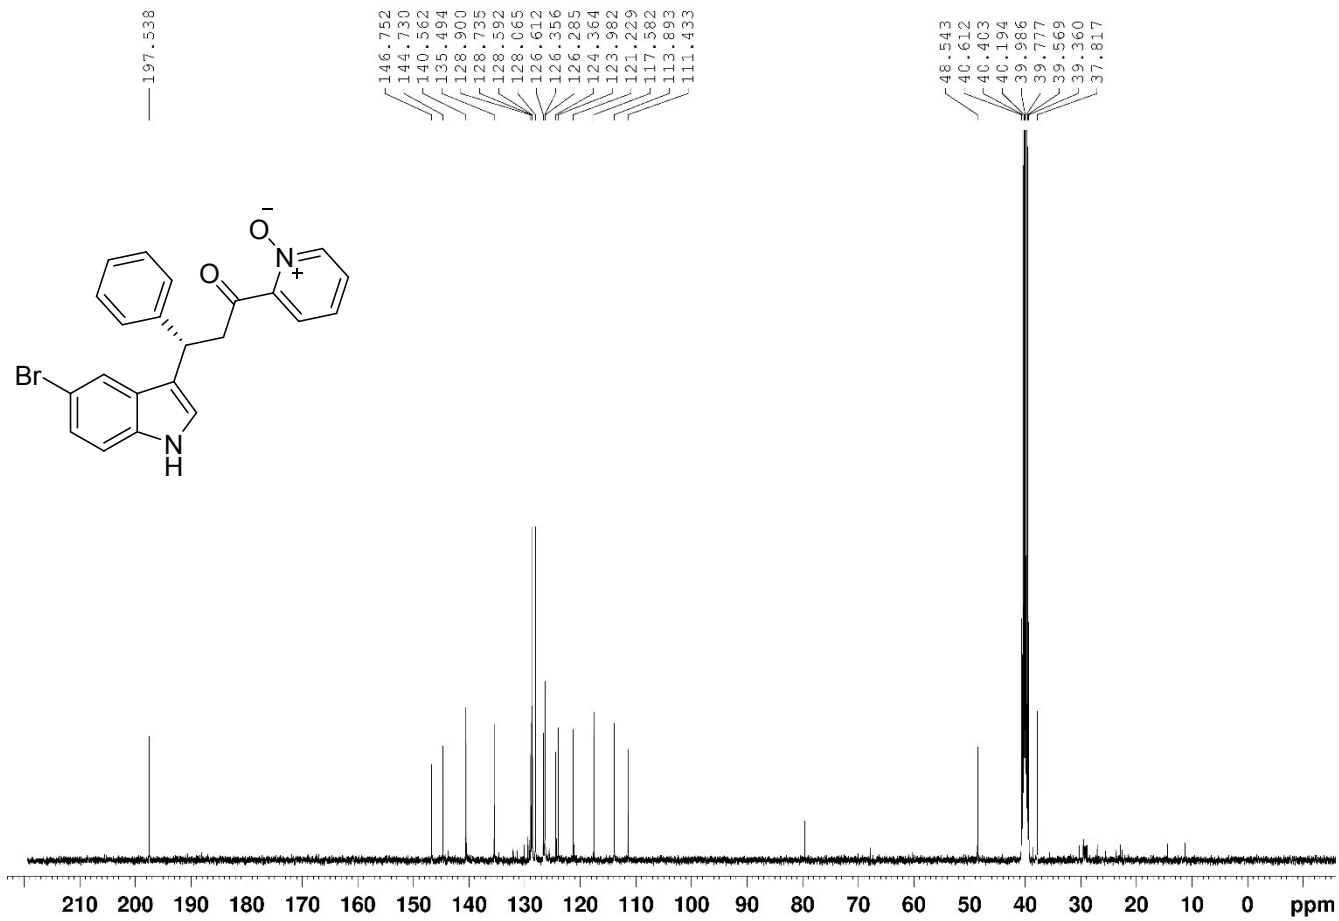

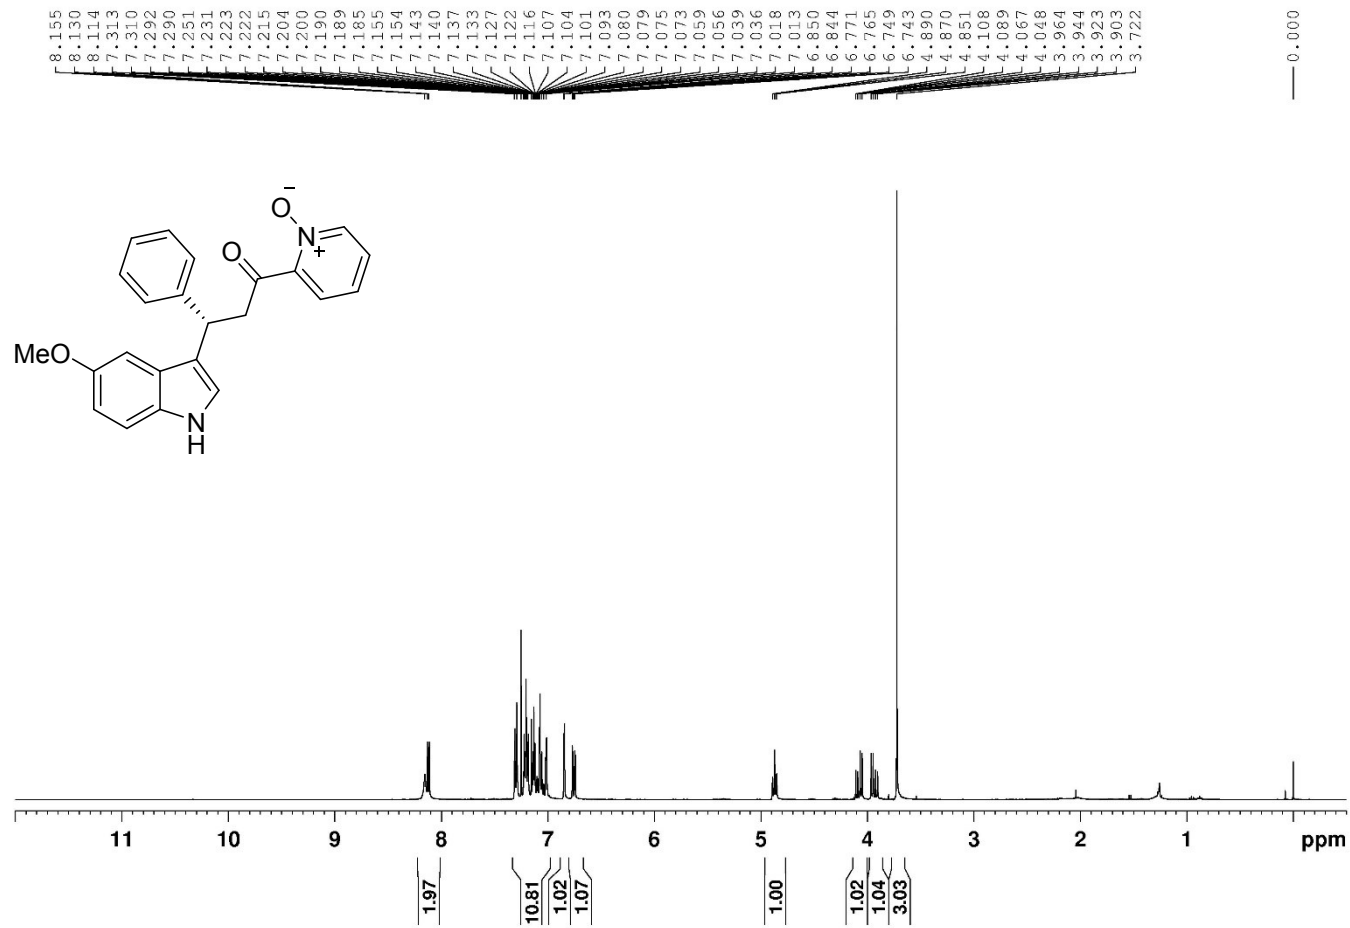

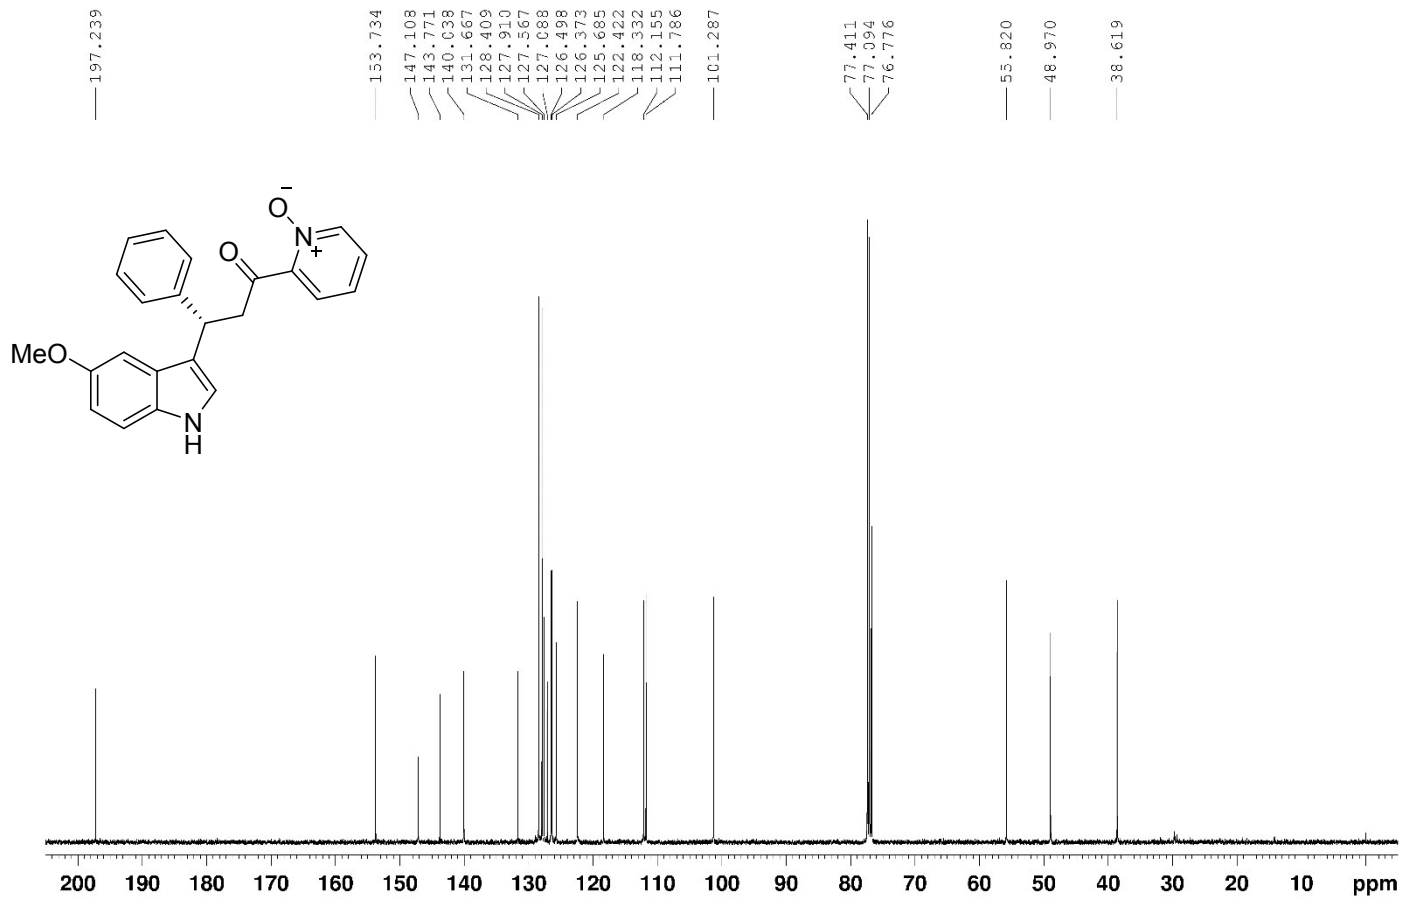

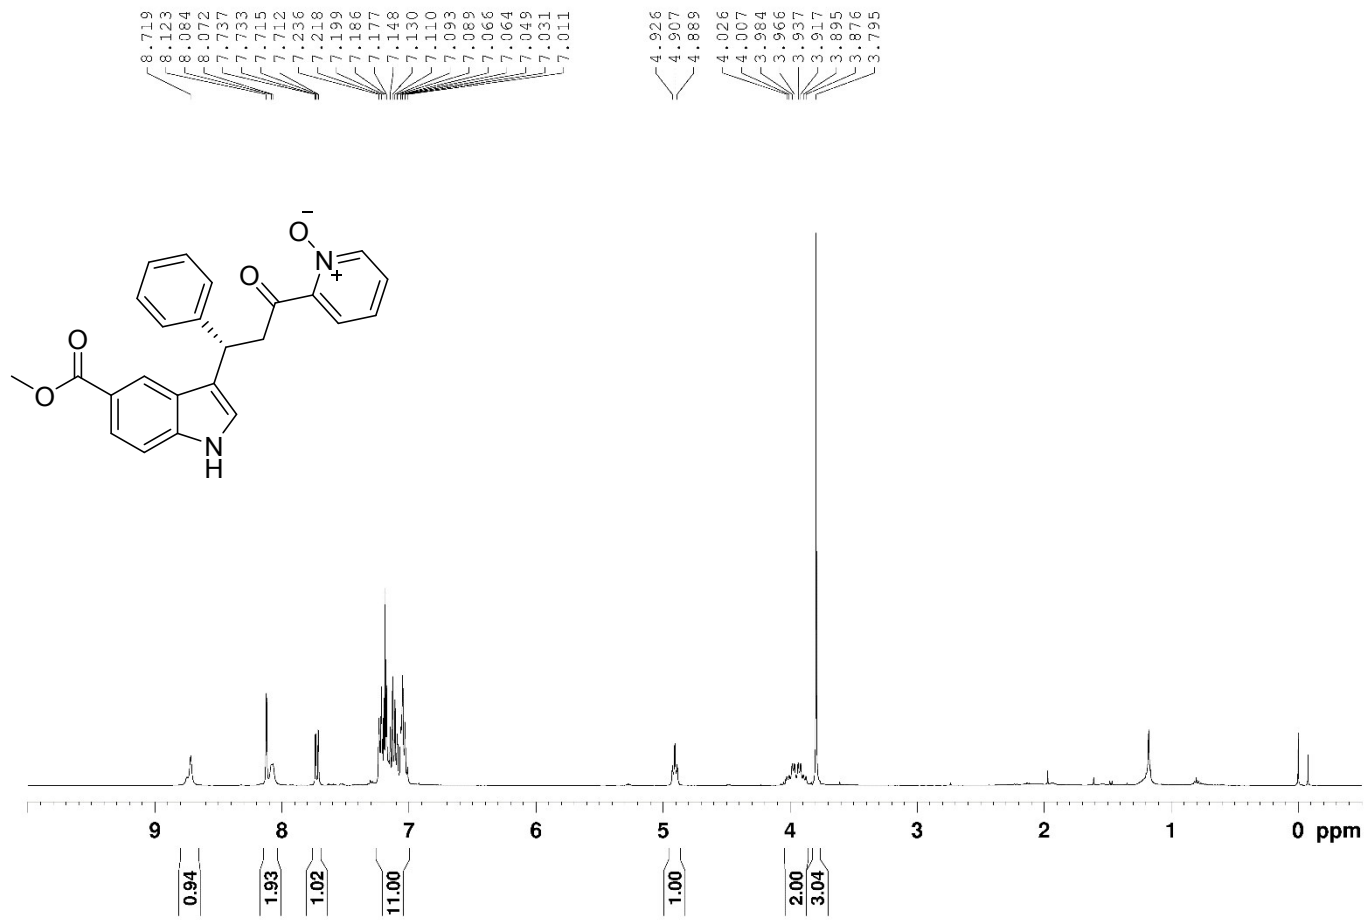



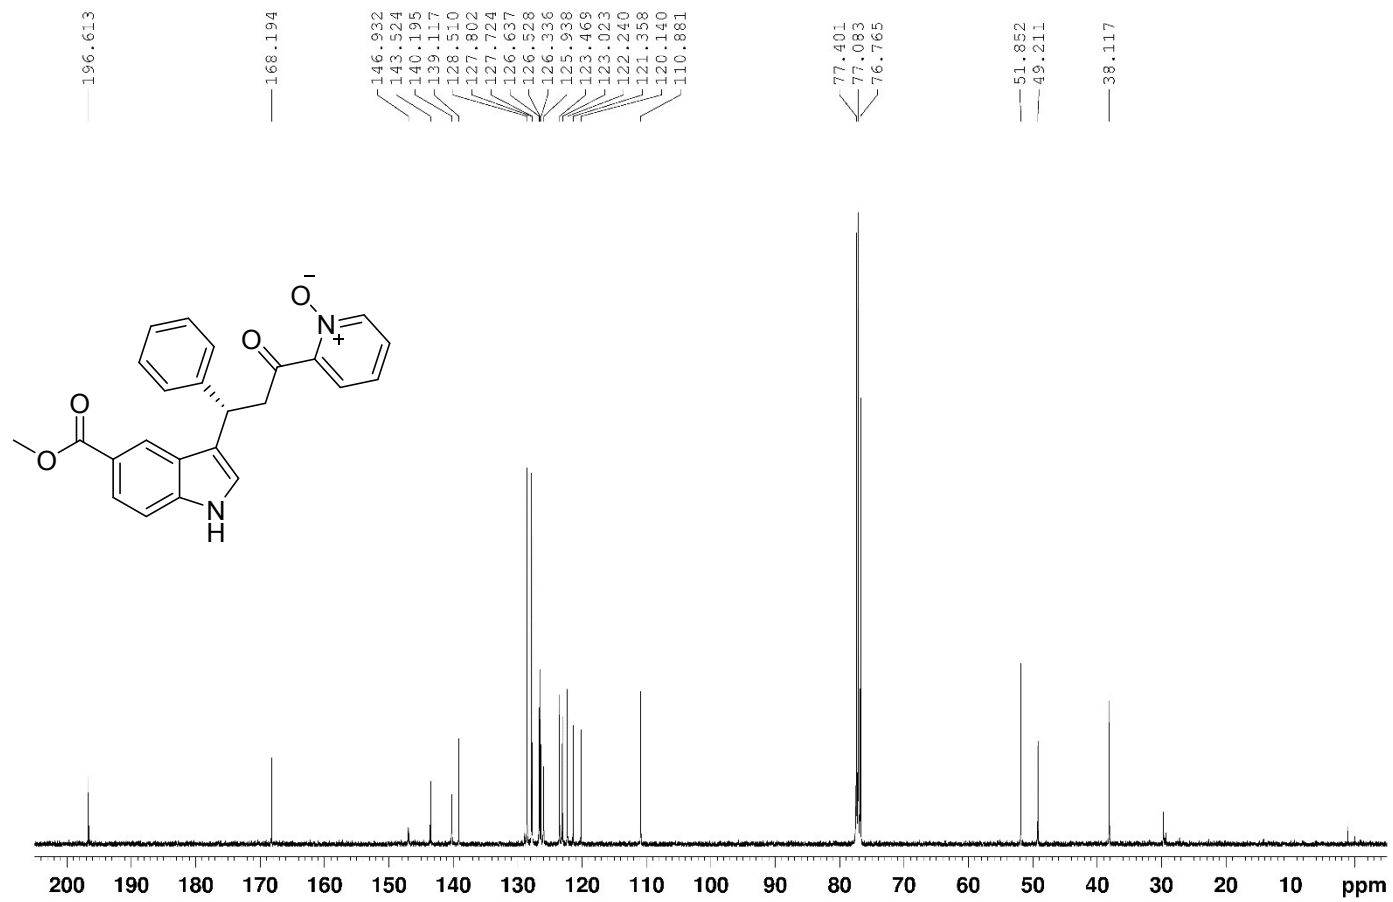

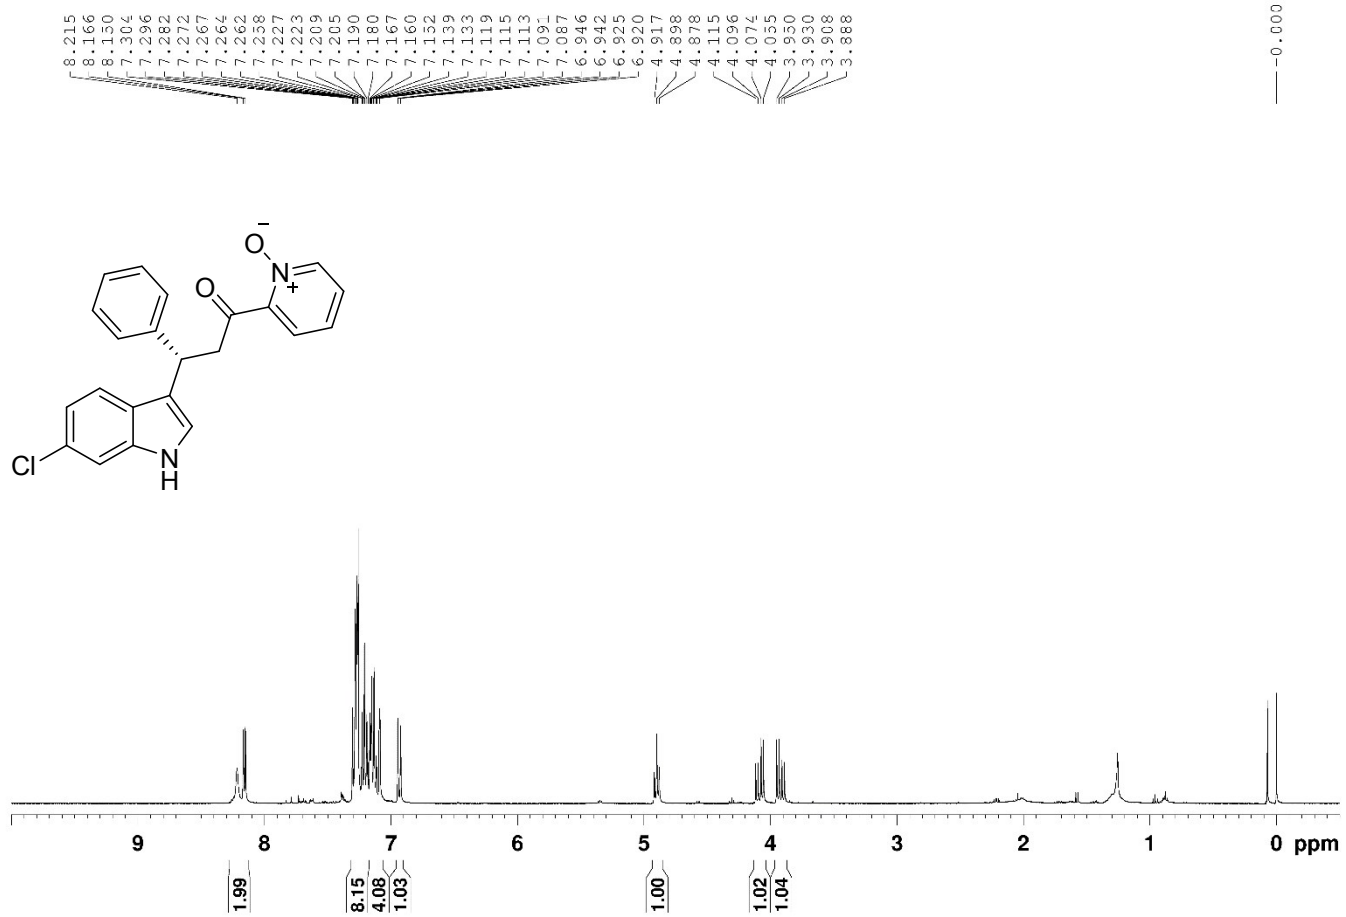

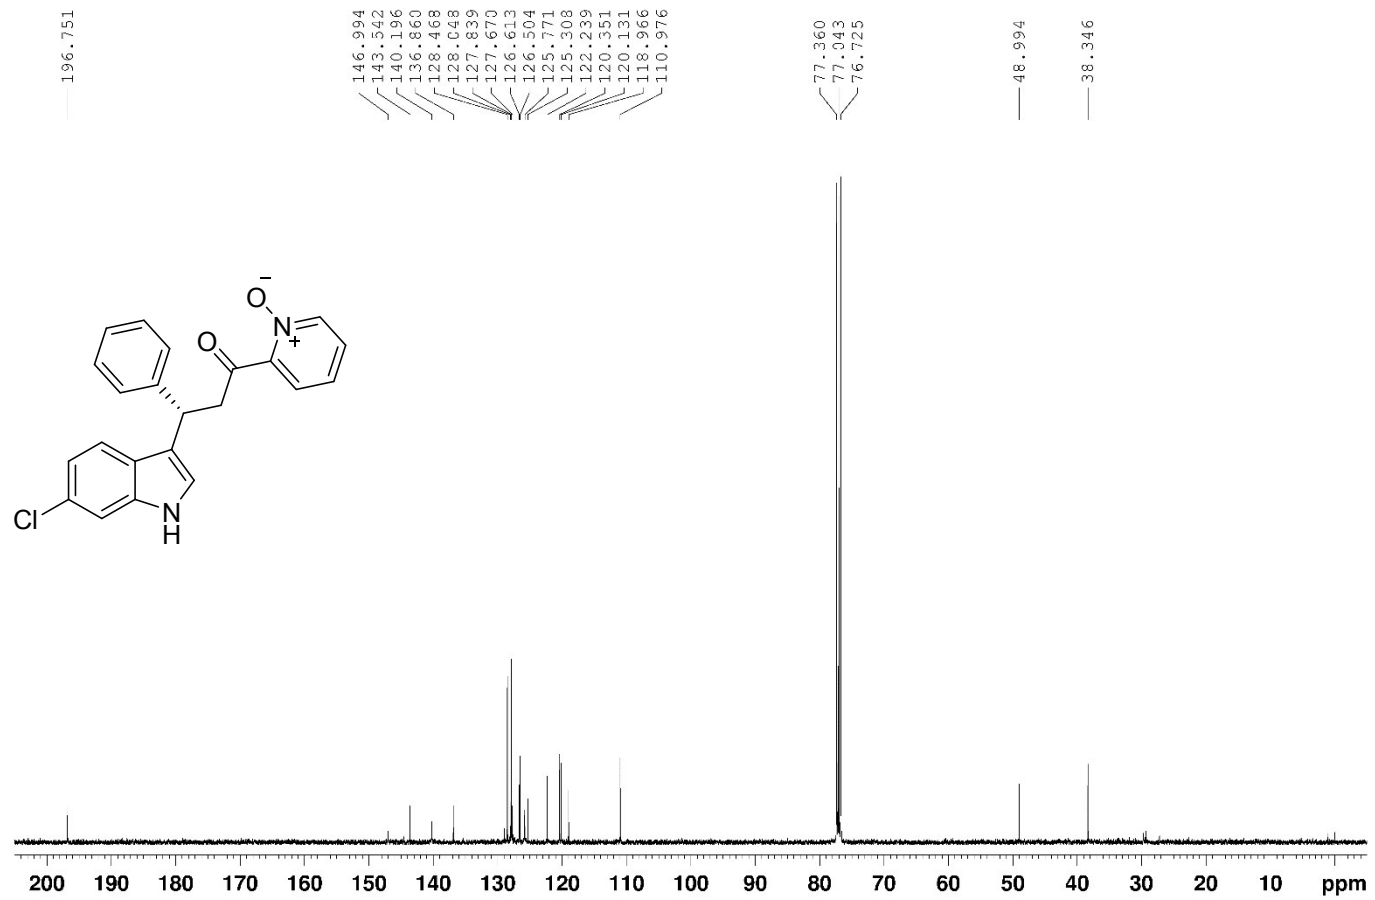

## 7. Copies of HPLC Traces

### 4a

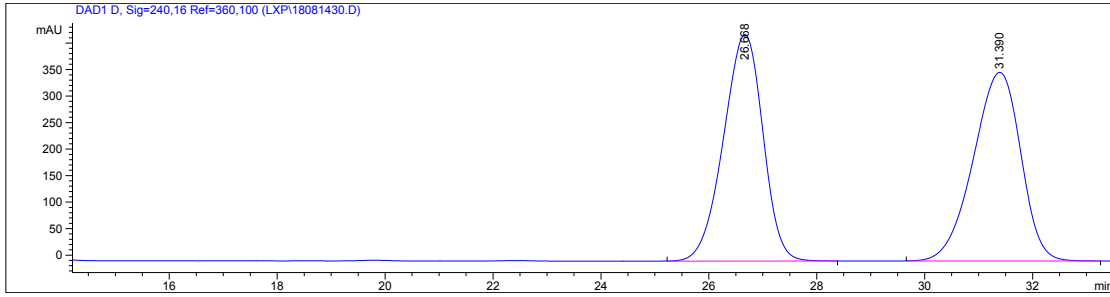

Signal 4: DAD1 D, Sig=240,16 Ref=360,100

| Peak # | RetTime [min] | Type | Width [min] | Area [mAU*s] | Height [mAU] | Area %  |
|--------|---------------|------|-------------|--------------|--------------|---------|
| 1      | 26.668        | BB   | 0.7982      | 2.17536e4    | 427.09064    | 50.0074 |
| 2      | 31.390        | BB   | 0.9614      | 2.17472e4    | 355.64304    | 49.9926 |

Totals : 4.35008e4 782.73367

Results obtained with enhanced integrator!

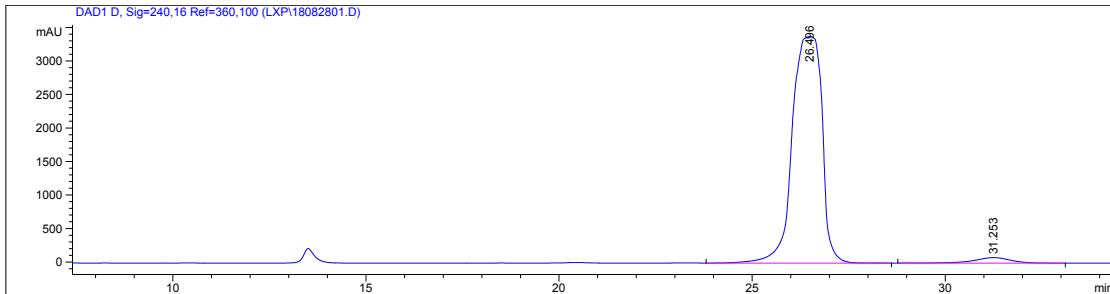

Signal 4: DAD1 D, Sig=240,16 Ref=360,100

| Peak # | RetTime [min] | Type | Width [min] | Area [mAU*s] | Height [mAU] | Area %  |
|--------|---------------|------|-------------|--------------|--------------|---------|
| 1      | 26.496        | VB   | 0.8746      | 1.80353e5    | 3379.63232   | 97.0775 |
| 2      | 31.253        | BP   | 0.9935      | 5429.47998   | 81.89258     | 2.9225  |

Totals : 1.85782e5 3461.52490

Results obtained with enhanced integrator!

4b

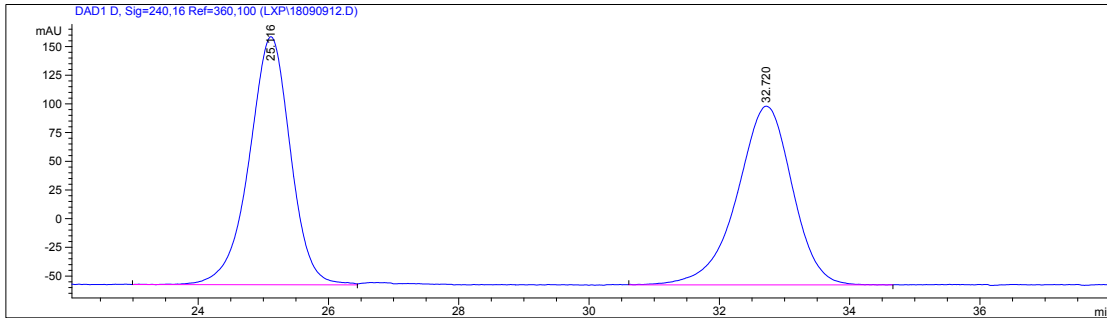

Signal 4: DAD1 D, Sig=240,16 Ref=360,100

| Peak # | RetTime [min] | Type | Width [min] | Area [mAU*s] | Height [mAU] | Area %  |
|--------|---------------|------|-------------|--------------|--------------|---------|
| 1      | 25.116        | VV   | 0.6698      | 9516.56641   | 216.06914    | 50.9274 |
| 2      | 32.720        | BP   | 0.8954      | 9169.95801   | 155.63040    | 49.0726 |

Totals : 1.86865e4 371.69954

Results obtained with enhanced integrator!

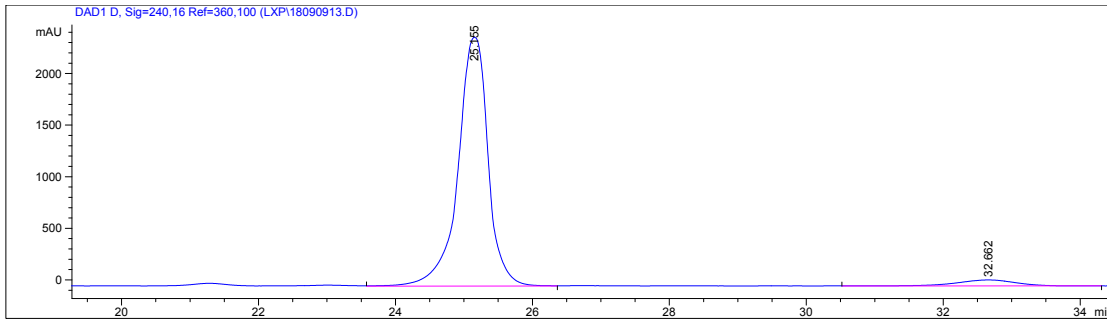

Signal 4: DAD1 D, Sig=240,16 Ref=360,100

| Peak # | RetTime [min] | Type | Width [min] | Area [mAU*s] | Height [mAU] | Area %  |
|--------|---------------|------|-------------|--------------|--------------|---------|
| 1      | 25.155        | VV   | 0.4595      | 7.34546e4    | 2410.69580   | 95.4372 |
| 2      | 32.662        | VB   | 0.8615      | 3511.81470   | 58.40101     | 4.5628  |

Totals : 7.69664e4 2469.09681

Results obtained with enhanced integrator!

4c

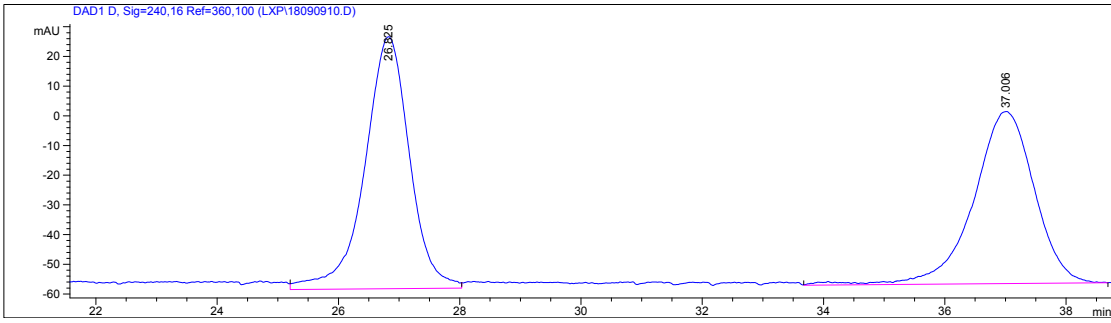

Signal 4: DAD1 D, Sig=240,16 Ref=360,100

| Peak # | RetTime [min] | Type | Width [min] | Area [mAU*s] | Height [mAU] | Area %  |
|--------|---------------|------|-------------|--------------|--------------|---------|
| 1      | 26.825        | VV   | 0.7778      | 4348.51074   | 84.85949     | 51.8095 |
| 2      | 37.006        | VBA  | 1.0383      | 4044.76196   | 57.95084     | 48.1905 |

Totals : 8393.27271 142.81033

Results obtained with enhanced integrator!

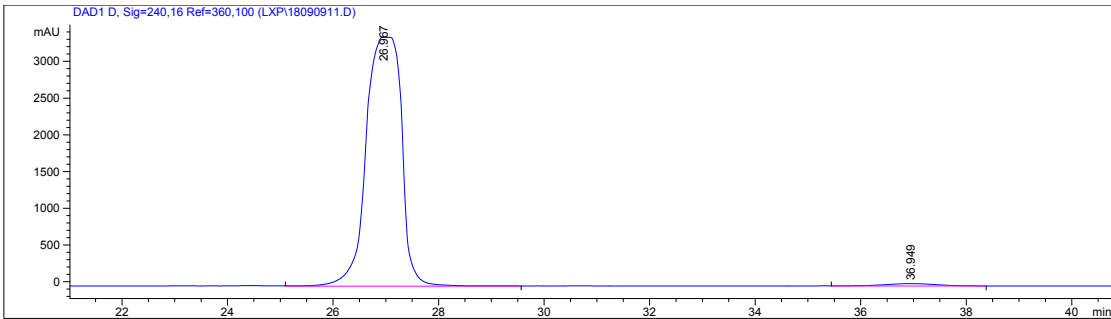

Signal 4: DAD1 D, Sig=240,16 Ref=360,100

| Peak # | RetTime [min] | Type | Width [min] | Area [mAU*s] | Height [mAU] | Area %  |
|--------|---------------|------|-------------|--------------|--------------|---------|
| 1      | 26.967        | VV   | 0.6546      | 1.57520e5    | 3386.75244   | 98.5055 |
| 2      | 36.949        | VV   | 0.9573      | 2389.81201   | 33.29876     | 1.4945  |

Totals : 1.59910e5 3420.05120

Results obtained with enhanced integrator!

4d

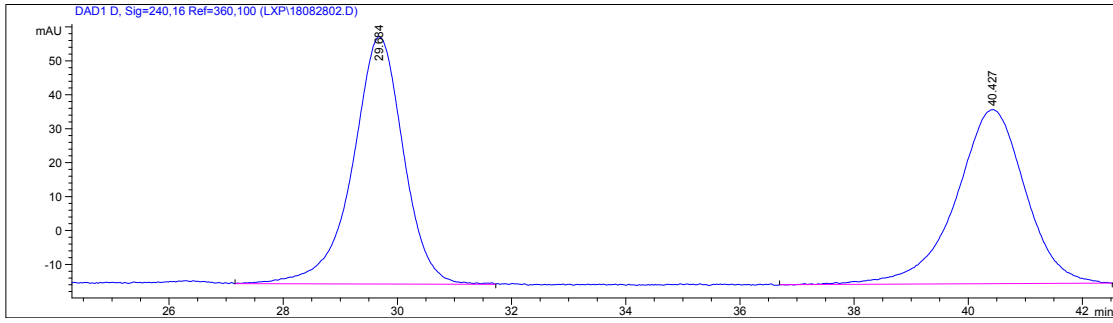

Signal 4: DAD1 D, Sig=240,16 Ref=360,100

| Peak # | RetTime [min] | Type | Width [min] | Area [mAU*s] | Height [mAU] | Area %  |
|--------|---------------|------|-------------|--------------|--------------|---------|
| 1      | 29.684        | VB   | 0.9463      | 4513.34863   | 72.89516     | 50.9745 |
| 2      | 40.427        | PV   | 1.2149      | 4340.78711   | 51.31431     | 49.0255 |

Totals : 8854.13574 124.20947

Results obtained with enhanced integrator!

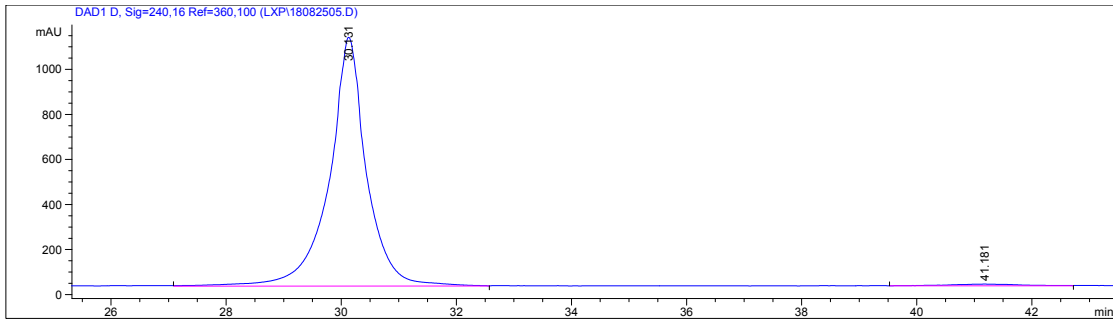

Signal 4: DAD1 D, Sig=240,16 Ref=360,100

| Peak # | RetTime [min] | Type | Width [min] | Area [mAU*s] | Height [mAU] | Area %  |
|--------|---------------|------|-------------|--------------|--------------|---------|
| 1      | 30.131        | VV   | 0.6103      | 4.97986e4    | 1103.86926   | 98.5906 |
| 2      | 41.181        | VV   | 1.0746      | 711.88721    | 7.87502      | 1.4094  |

Totals : 5.05105e4 1111.74428

Results obtained with enhanced integrator!

4e

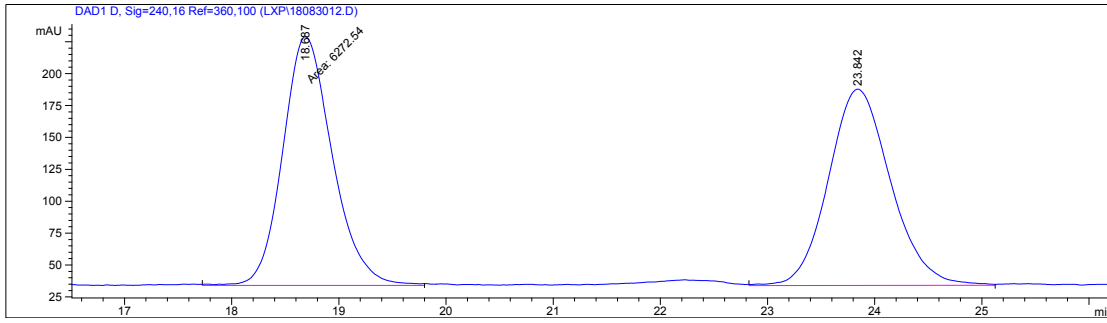

Signal 5: DAD1 E, Sig=254,16 Ref=360,100

| Peak # | RetTime [min] | Type | Width [min] | Area [mAU*s] | Height [mAU] | Area %  |
|--------|---------------|------|-------------|--------------|--------------|---------|
| 1      | 18.690        | VB   | 0.4918      | 3175.78882   | 94.55867     | 50.5529 |
| 2      | 23.841        | VV   | 0.6271      | 3106.32153   | 75.02407     | 49.4471 |

Totals : 6282.11035 169.58274

Results obtained with enhanced integrator!

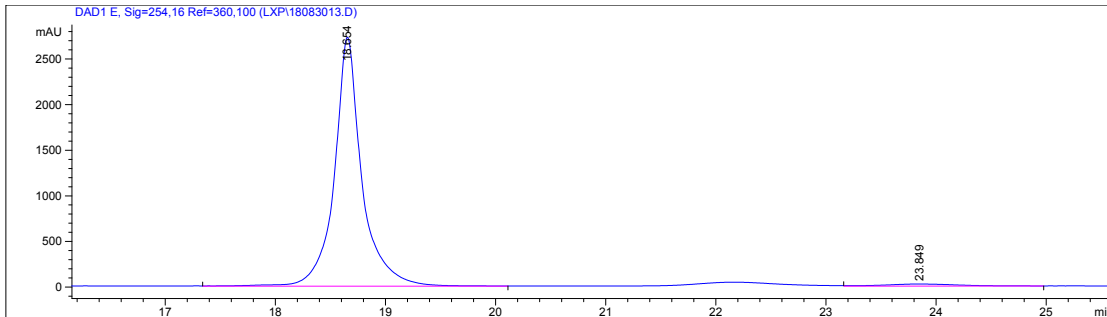

Signal 5: DAD1 E, Sig=254,16 Ref=360,100

| Peak # | RetTime [min] | Type | Width [min] | Area [mAU*s] | Height [mAU] | Area %  |
|--------|---------------|------|-------------|--------------|--------------|---------|
| 1      | 18.654        | VB   | 0.2396      | 4.76252e4    | 2729.20068   | 97.7478 |
| 2      | 23.849        | VV   | 0.6324      | 1097.33411   | 22.60127     | 2.2522  |

Totals : 4.87226e4 2751.80196

Results obtained with enhanced integrator!



4f

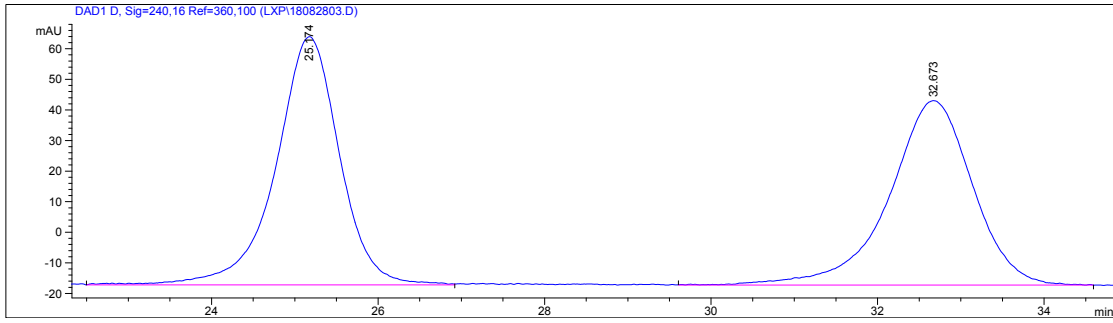

Signal 4: DAD1 D, Sig=240,16 Ref=360,100

| Peak # | RetTime [min] | Type | Width [min] | Area [mAU*s] | Height [mAU] | Area %  |
|--------|---------------|------|-------------|--------------|--------------|---------|
| 1      | 25.174        | VB   | 0.7935      | 4322.22266   | 81.13294     | 50.6807 |
| 2      | 32.673        | BP   | 1.0141      | 4206.12500   | 60.27697     | 49.3193 |

Totals : 8528.34766 141.40992

Results obtained with enhanced integrator!

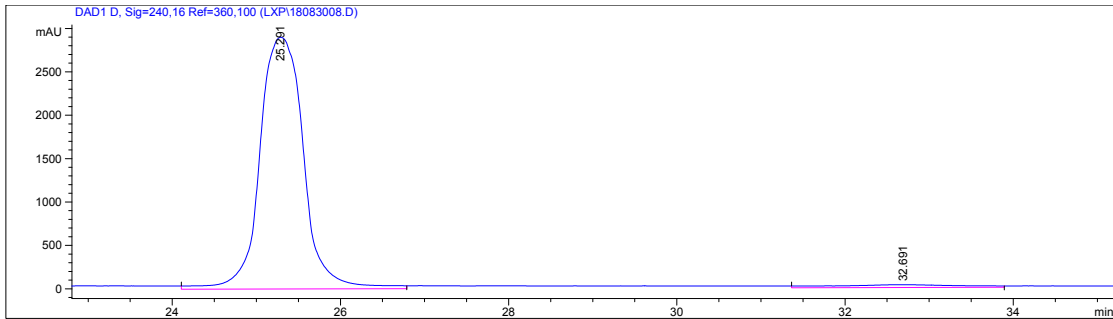

Signal 4: DAD1 D, Sig=240,16 Ref=360,100

| Peak # | RetTime [min] | Type | Width [min] | Area [mAU*s] | Height [mAU] | Area %  |
|--------|---------------|------|-------------|--------------|--------------|---------|
| 1      | 25.291        | VV   | 0.5732      | 1.04703e5    | 2900.22632   | 96.7215 |
| 2      | 32.691        | VV   | 1.3906      | 3549.05542   | 32.38370     | 3.2785  |

Totals : 1.08252e5 2932.61002

Results obtained with enhanced integrator!

4g

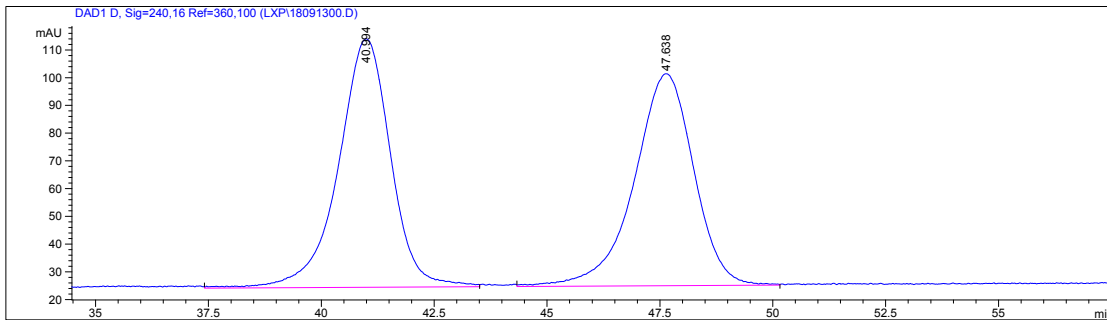

Signal 4: DAD1 D, Sig=240,16 Ref=360,100

| Peak # | RetTime [min] | Type | Width [min] | Area [mAU*s] | Height [mAU] | Area %  |
|--------|---------------|------|-------------|--------------|--------------|---------|
| 1      | 40.994        | VB   | 1.1918      | 7220.98193   | 89.64089     | 50.6599 |
| 2      | 47.638        | VB   | 1.1816      | 7032.86084   | 76.42580     | 49.3401 |

Totals : 1.42538e4 166.06670

Results obtained with enhanced integrator!

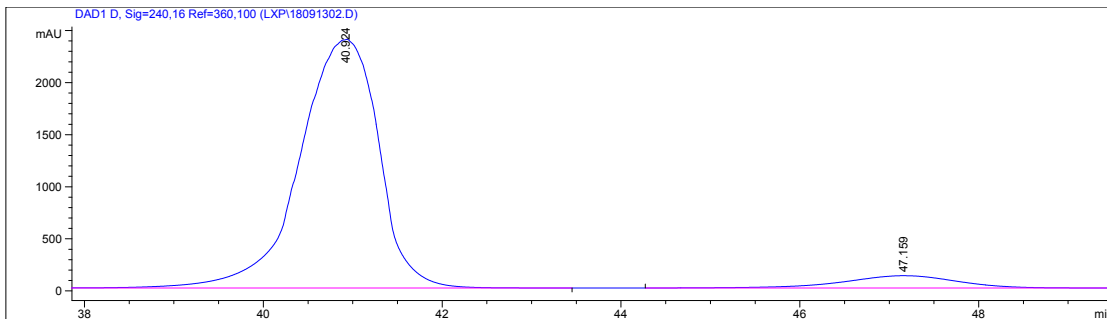

Signal 4: DAD1 D, Sig=240,16 Ref=360,100

| Peak # | RetTime [min] | Type | Width [min] | Area [mAU*s] | Height [mAU] | Area %  |
|--------|---------------|------|-------------|--------------|--------------|---------|
| 1      | 40.924        | VB   | 0.9231      | 1.46090e5    | 2383.41162   | 93.3621 |
| 2      | 47.159        | BBA  | 1.2820      | 1.03867e4    | 118.10255    | 6.6379  |

Totals : 1.56477e5 2501.51417

Results obtained with enhanced integrator!

4h

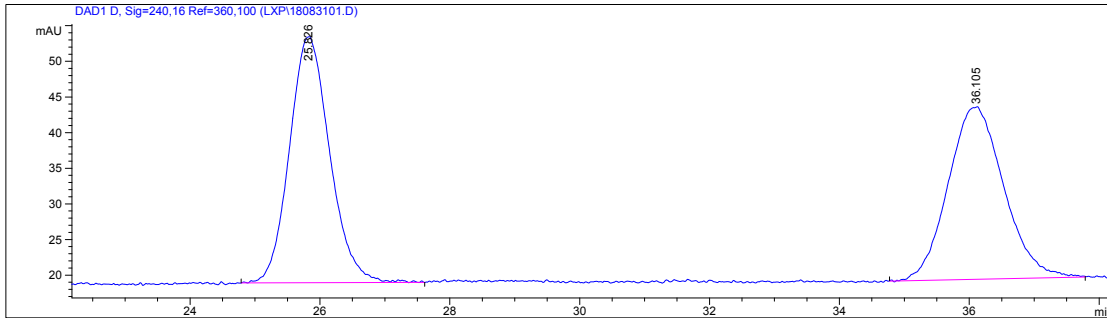

Signal 4: DAD1 D, Sig=240,16 Ref=360,100

| Peak # | RetTime [min] | Type | Width [min] | Area [mAU*s] | Height [mAU] | Area %  |
|--------|---------------|------|-------------|--------------|--------------|---------|
| 1      | 25.826        | BP   | 0.6474      | 1489.26562   | 34.51617     | 50.8356 |
| 2      | 36.105        | BB   | 0.7999      | 1440.30945   | 24.14571     | 49.1644 |

Totals : 2929.57507 58.66189

Results obtained with enhanced integrator!

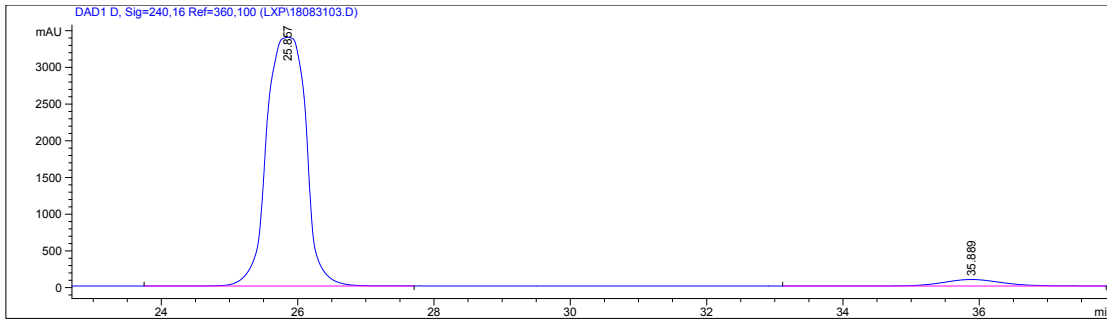

Signal 4: DAD1 D, Sig=240,16 Ref=360,100

| Peak # | RetTime [min] | Type | Width [min] | Area [mAU*s] | Height [mAU] | Area %  |
|--------|---------------|------|-------------|--------------|--------------|---------|
| 1      | 25.857        | VB   | 0.6562      | 1.34848e5    | 3389.43872   | 96.2683 |
| 2      | 35.889        | VB   | 0.9158      | 5227.13623   | 88.14563     | 3.7317  |

Totals : 1.40075e5 3477.58435

Results obtained with enhanced integrator!

4i

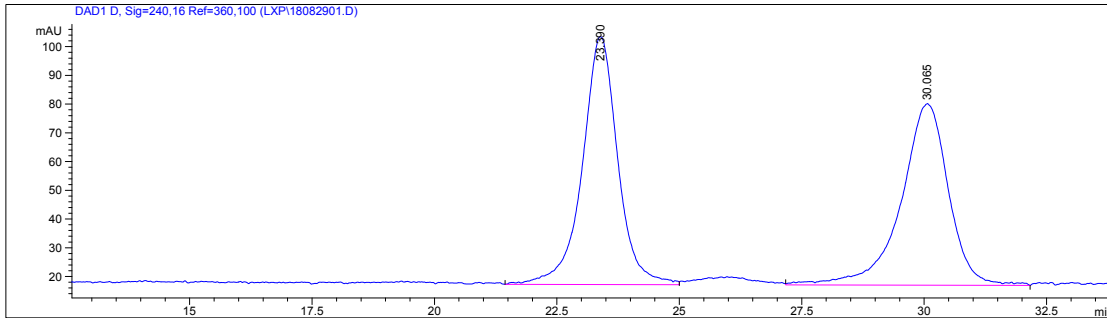

Signal 4: DAD1 D, Sig=240,16 Ref=360,100

| Peak # | RetTime [min] | Type | Width [min] | Area [mAU*s] | Height [mAU] | Area %  |
|--------|---------------|------|-------------|--------------|--------------|---------|
| 1      | 23.390        | VV   | 0.7556      | 4343.30322   | 86.23058     | 50.4732 |
| 2      | 30.065        | VP   | 0.9955      | 4261.86523   | 63.14269     | 49.5268 |

Totals : 8605.16846 149.37327

Results obtained with enhanced integrator!

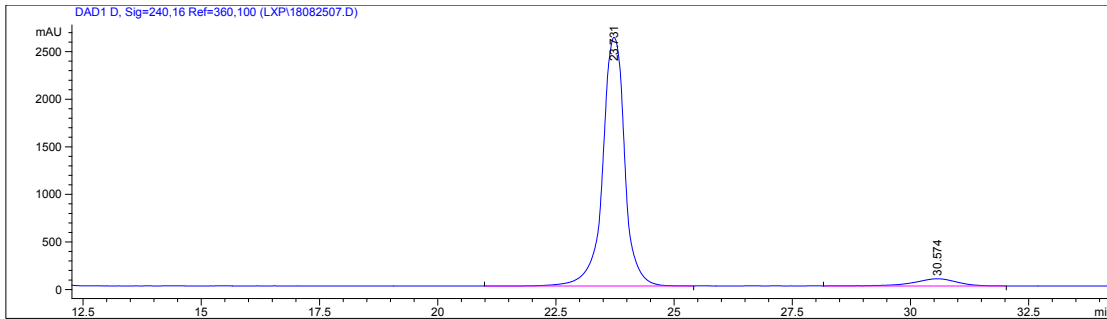

Signal 4: DAD1 D, Sig=240,16 Ref=360,100

| Peak # | RetTime [min] | Type | Width [min] | Area [mAU*s] | Height [mAU] | Area %  |
|--------|---------------|------|-------------|--------------|--------------|---------|
| 1      | 23.731        | VV   | 0.4986      | 8.48079e4    | 2613.64648   | 94.4740 |
| 2      | 30.574        | VV   | 0.9520      | 4960.56787   | 76.15070     | 5.5260  |

Totals : 8.97685e4 2689.79718

Results obtained with enhanced integrator!

4j

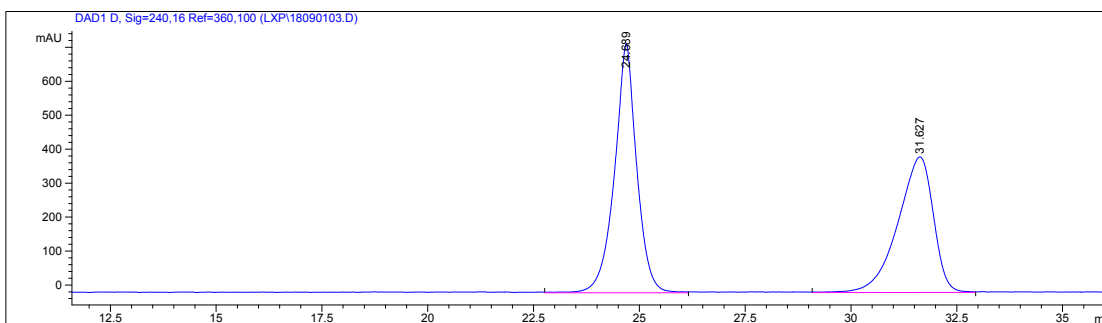

Signal 4: DAD1 D, Sig=240,16 Ref=360,100

| Peak # | RetTime [min] | Type | Width [min] | Area [mAU*s] | Height [mAU] | Area %  |
|--------|---------------|------|-------------|--------------|--------------|---------|
| 1      | 24.689        | VV   | 0.5066      | 2.67934e4    | 732.81940    | 53.4324 |
| 2      | 31.627        | VV   | 0.8860      | 2.33510e4    | 399.48334    | 46.5676 |

Totals : 5.01444e4 1132.30273

Results obtained with enhanced integrator!

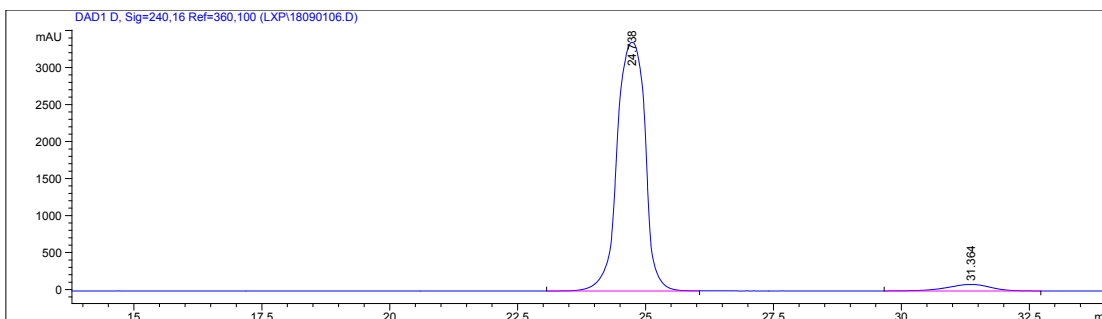

Signal 4: DAD1 D, Sig=240,16 Ref=360,100

| Peak # | RetTime [min] | Type | Width [min] | Area [mAU*s] | Height [mAU] | Area %  |
|--------|---------------|------|-------------|--------------|--------------|---------|
| 1      | 24.738        | VV   | 0.6182      | 1.27403e5    | 3361.64380   | 95.9749 |
| 2      | 31.364        | VV   | 0.8968      | 5343.19482   | 88.44862     | 4.0251  |

Totals : 1.32746e5 3450.09242

Results obtained with enhanced integrator!

4k

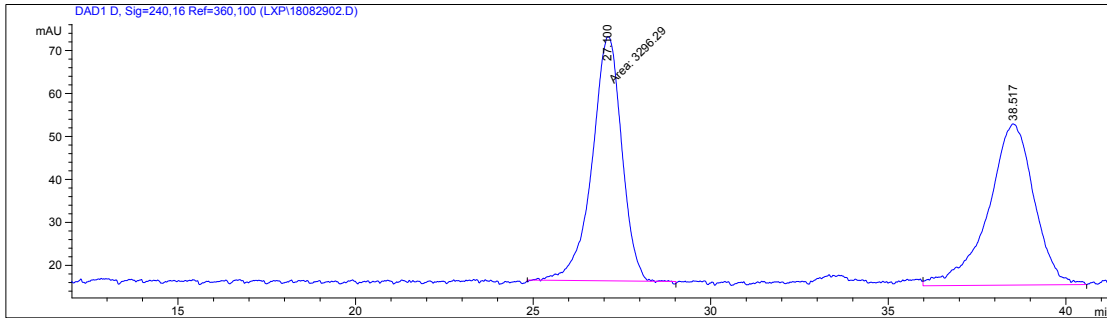

Signal 4: DAD1 D, Sig=240,16 Ref=360,100

| Peak # | RetTime [min] | Type | Width [min] | Area [mAU*s] | Height [mAU] | Area %  |
|--------|---------------|------|-------------|--------------|--------------|---------|
| 1      | 27.100        | MM   | 0.9671      | 3296.28906   | 56.80935     | 49.4226 |
| 2      | 38.517        | VP   | 1.1055      | 3373.31226   | 37.49756     | 50.5774 |

Totals : 6669.60132 94.30691

Results obtained with enhanced integrator!

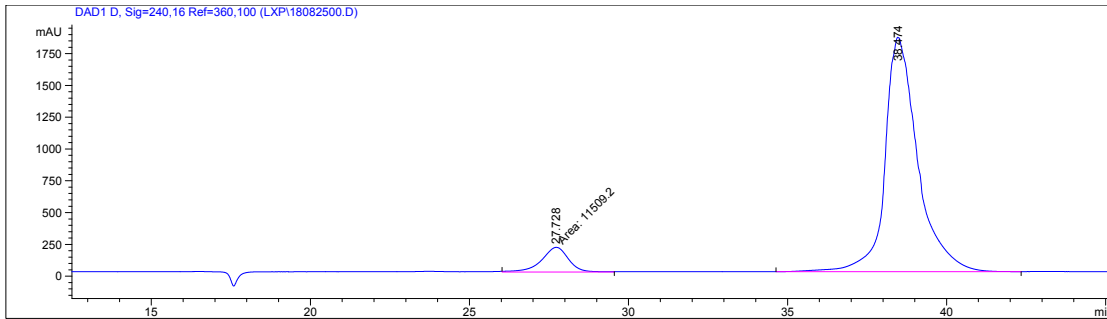

Signal 4: DAD1 D, Sig=240,16 Ref=360,100

| Peak # | RetTime [min] | Type | Width [min] | Area [mAU*s] | Height [mAU] | Area %  |
|--------|---------------|------|-------------|--------------|--------------|---------|
| 1      | 27.728        | MM   | 0.9871      | 1.15092e4    | 194.32687    | 8.0239  |
| 2      | 38.474        | BB   | 0.8921      | 1.31928e5    | 1840.94043   | 91.9761 |

Totals : 1.43437e5 2035.26730

Results obtained with enhanced integrator!

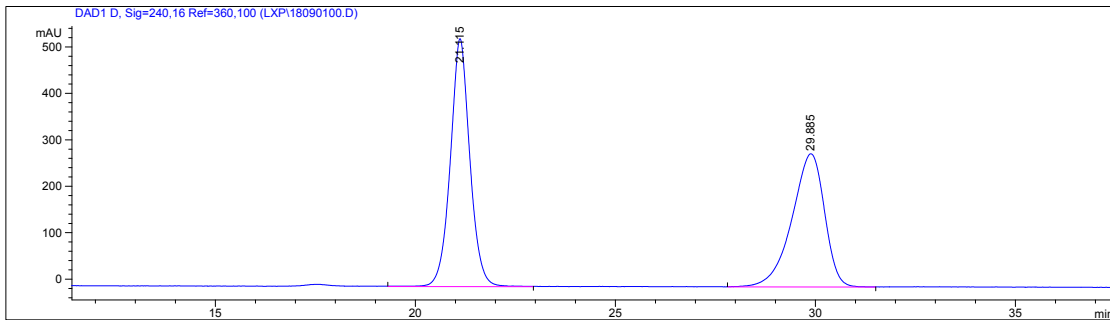

Signal 4: DAD1 D, Sig=240,16 Ref=360,100

| Peak # | RetTime [min] | Type | Width [min] | Area [mAU*s] | Height [mAU] | Area %  |
|--------|---------------|------|-------------|--------------|--------------|---------|
| 1      | 21.115        | BB   | 0.5038      | 1.81073e4    | 533.78015    | 52.6108 |
| 2      | 29.885        | BB   | 0.8671      | 1.63102e4    | 286.97375    | 47.3892 |

Totals : 3.44175e4 820.75391

Results obtained with enhanced integrator!

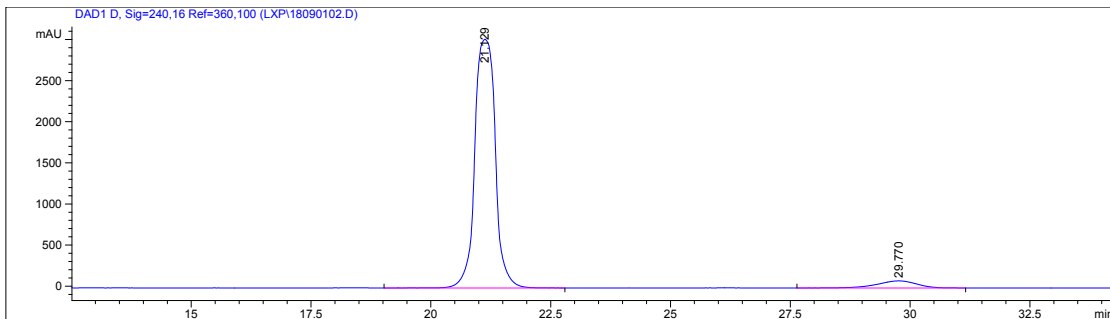

Signal 4: DAD1 D, Sig=240,16 Ref=360,100

| Peak # | RetTime [min] | Type | Width [min] | Area [mAU*s] | Height [mAU] | Area %  |
|--------|---------------|------|-------------|--------------|--------------|---------|
| 1      | 21.129        | VV   | 0.4792      | 9.00437e4    | 3025.81274   | 94.6387 |
| 2      | 29.770        | VV   | 0.8949      | 5100.94482   | 86.63347     | 5.3613  |

Totals : 9.51446e4 3112.44621

Results obtained with enhanced integrator!

4m

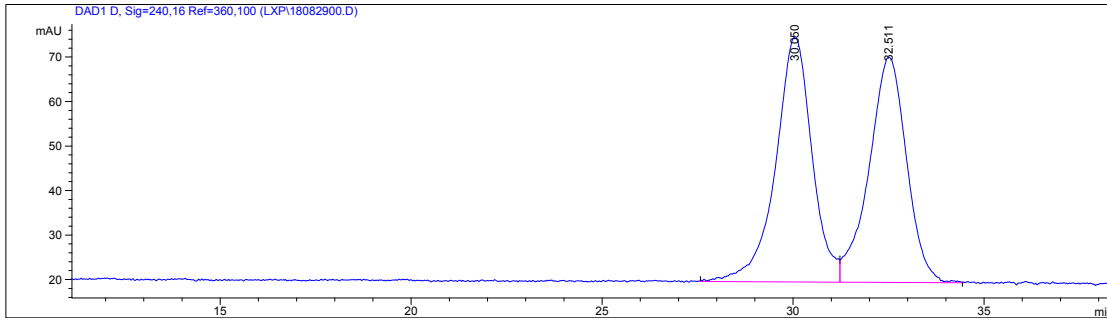

Signal 4: DAD1 D, Sig=240,16 Ref=360,100

| Peak # | RetTime [min] | Type | Width [min] | Area [mAU*s] | Height [mAU] | Area %  |
|--------|---------------|------|-------------|--------------|--------------|---------|
| 1      | 30.050        | BV   | 0.9771      | 3651.51489   | 55.10719     | 51.3386 |
| 2      | 32.511        | VB   | 1.0235      | 3461.09302   | 50.50610     | 48.6614 |

Totals : 7112.60791 105.61329

Results obtained with enhanced integrator!

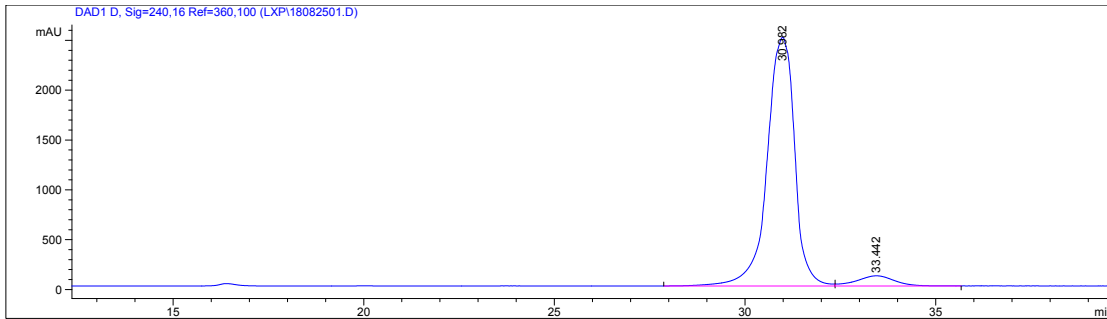

Signal 4: DAD1 D, Sig=240,16 Ref=360,100

| Peak # | RetTime [min] | Type | Width [min] | Area [mAU*s] | Height [mAU] | Area %  |
|--------|---------------|------|-------------|--------------|--------------|---------|
| 1      | 30.982        | BV   | 0.7773      | 1.25172e5    | 2494.95068   | 94.7893 |
| 2      | 33.442        | VP   | 1.0148      | 6880.89111   | 101.51363    | 5.2107  |

Totals : 1.32053e5 2596.46432

Results obtained with enhanced integrator!



4n

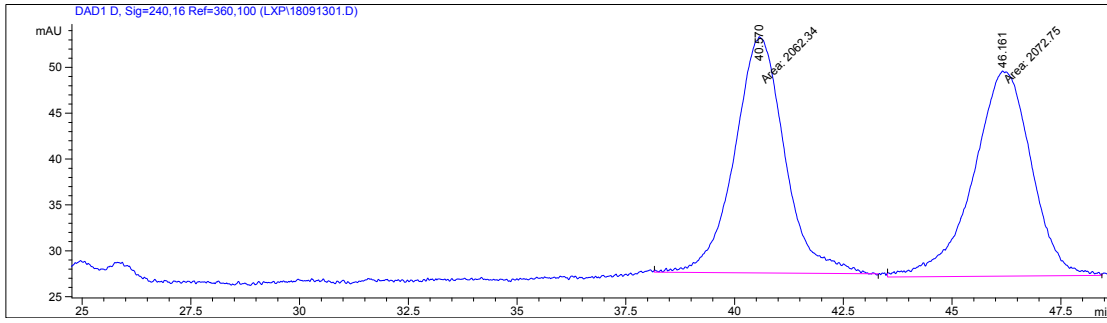

Signal 4: DAD1 D, Sig=240,16 Ref=360,100

| Peak # | RetTime [min] | Type | Width [min] | Area [mAU*s] | Height [mAU] | Area %  |
|--------|---------------|------|-------------|--------------|--------------|---------|
| 1      | 40.570        | MM   | 1.3343      | 2062.33643   | 25.75996     | 49.8741 |
| 2      | 46.161        | MM   | 1.5440      | 2072.74536   | 22.37351     | 50.1259 |

Totals : 4135.08179 48.13347

Results obtained with enhanced integrator!

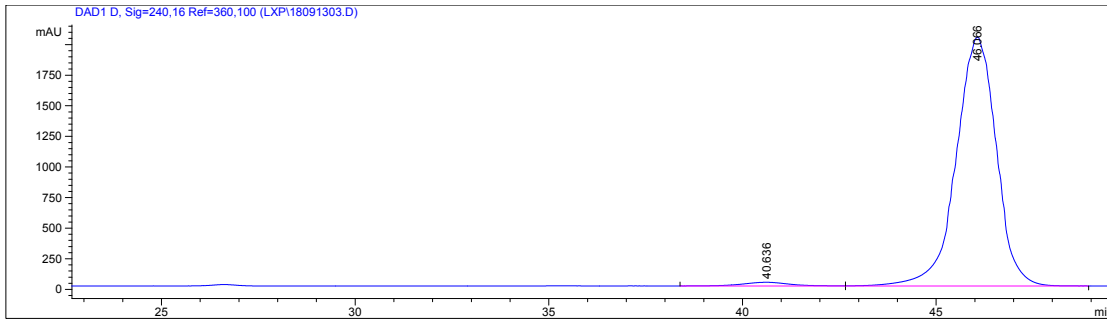

Signal 4: DAD1 D, Sig=240,16 Ref=360,100

| Peak # | RetTime [min] | Type | Width [min] | Area [mAU*s] | Height [mAU] | Area %  |
|--------|---------------|------|-------------|--------------|--------------|---------|
| 1      | 40.636        | BV   | 1.0591      | 2482.18506   | 29.94384     | 1.6698  |
| 2      | 46.066        | VB   | 0.9077      | 1.46171e5    | 2030.90881   | 98.3302 |

Totals : 1.48654e5 2060.85265

Results obtained with enhanced integrator!

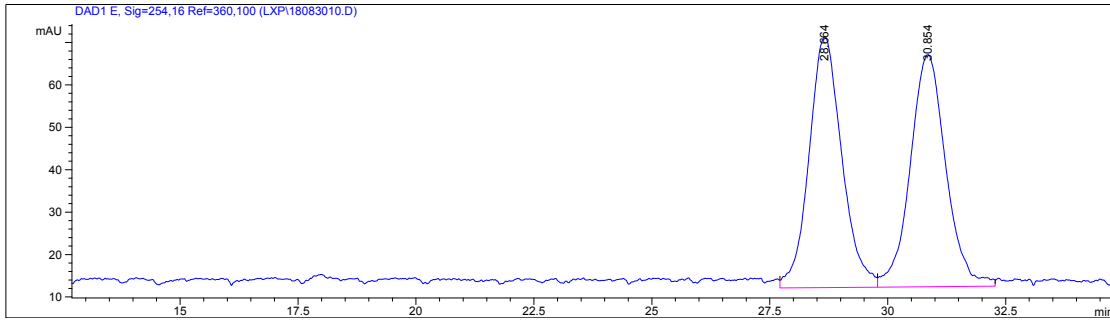

Signal 5: DAD1 E, Sig=254,16 Ref=360,100

| Peak # | RetTime [min] | Type | Width [min] | Area [mAU*s] | Height [mAU] | Area %  |
|--------|---------------|------|-------------|--------------|--------------|---------|
| 1      | 28.664        | VV   | 0.6615      | 2857.62573   | 59.16293     | 49.8885 |
| 2      | 30.854        | VB   | 0.7244      | 2870.40332   | 54.68626     | 50.1115 |

Totals : 5728.02905 113.84919

Results obtained with enhanced integrator!

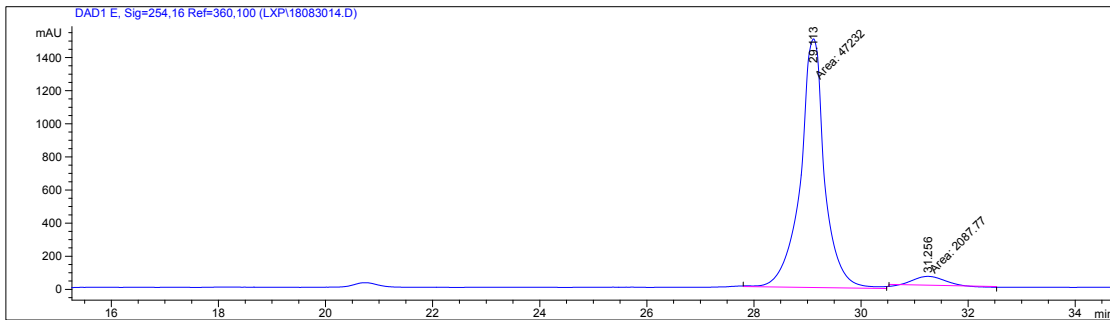

Signal 5: DAD1 E, Sig=254,16 Ref=360,100

| Peak # | RetTime [min] | Type | Width [min] | Area [mAU*s] | Height [mAU] | Area %  |
|--------|---------------|------|-------------|--------------|--------------|---------|
| 1      | 29.113        | MM   | 0.5242      | 4.72320e4    | 1501.66919   | 95.7669 |
| 2      | 31.256        | MM   | 0.6523      | 2087.77319   | 53.34237     | 4.2331  |

Totals : 4.93198e4 1555.01156

Results obtained with enhanced integrator!

4p

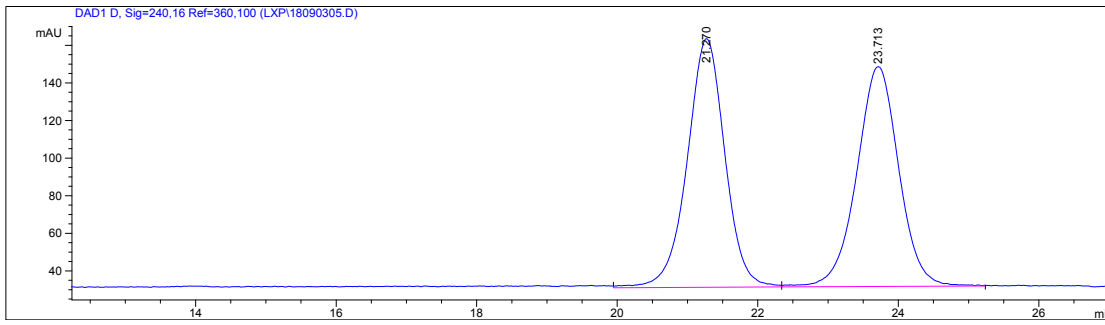

Signal 4: DAD1 D, Sig=240,16 Ref=360,100

| Peak # | RetTime [min] | Type | Width [min] | Area [mAU*s] | Height [mAU] | Area %  |
|--------|---------------|------|-------------|--------------|--------------|---------|
| 1      | 21.270        | VV   | 0.5715      | 4935.80664   | 132.23991    | 50.3572 |
| 2      | 23.713        | VB   | 0.6379      | 4865.79004   | 116.83361    | 49.6428 |

Totals : 9801.59668 249.07352

Results obtained with enhanced integrator!

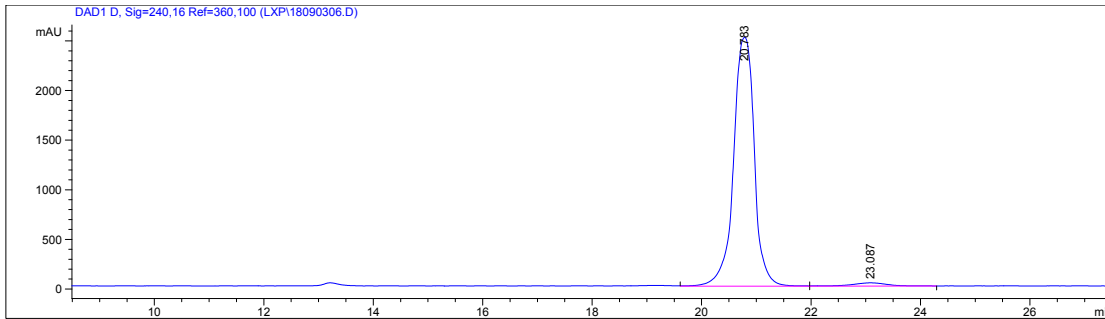

Signal 4: DAD1 D, Sig=240,16 Ref=360,100

| Peak # | RetTime [min] | Type | Width [min] | Area [mAU*s] | Height [mAU] | Area %  |
|--------|---------------|------|-------------|--------------|--------------|---------|
| 1      | 20.783        | VV   | 0.4184      | 6.58387e4    | 2507.28467   | 97.7939 |
| 2      | 23.087        | VV   | 0.6880      | 1485.22034   | 32.82004     | 2.2061  |

Totals : 6.73239e4 2540.10471

Results obtained with enhanced integrator!

4q

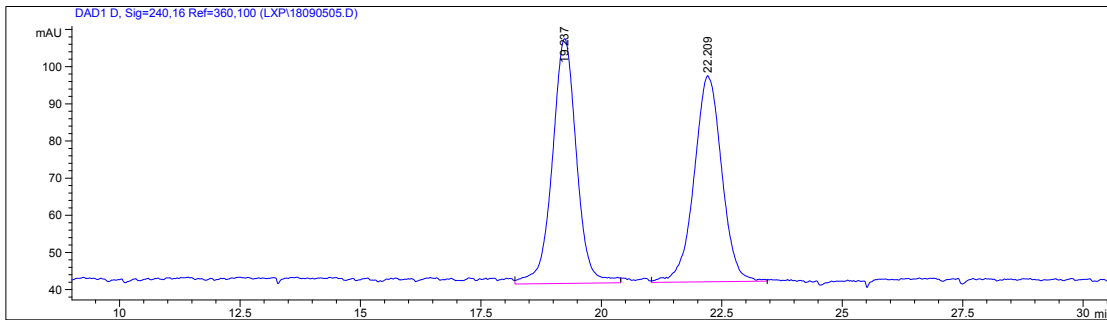

Signal 4: DAD1 D, Sig=240,16 Ref=360,100

| Peak # | RetTime [min] | Type | Width [min] | Area [mAU*s] | Height [mAU] | Area %  |
|--------|---------------|------|-------------|--------------|--------------|---------|
| 1      | 19.237        | VB   | 0.5307      | 2294.94604   | 65.83404     | 50.9639 |
| 2      | 22.209        | VB   | 0.6088      | 2208.13745   | 55.42449     | 49.0361 |

Totals : 4503.08350 121.25853

Results obtained with enhanced integrator!

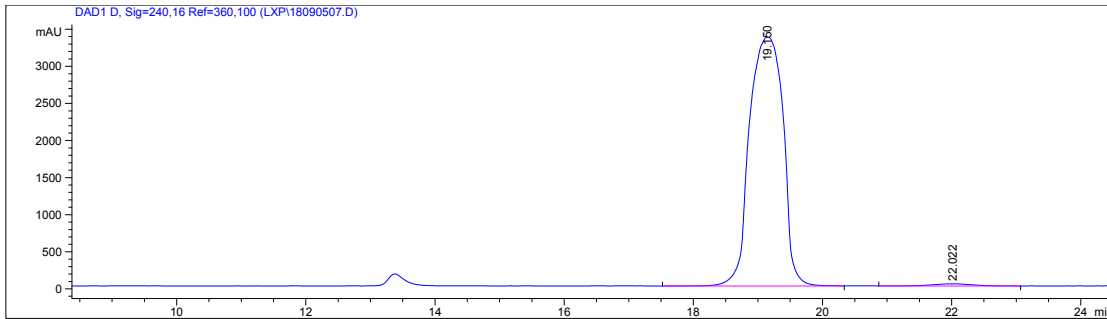

Signal 4: DAD1 D, Sig=240,16 Ref=360,100

| Peak # | RetTime [min] | Type | Width [min] | Area [mAU*s] | Height [mAU] | Area %  |
|--------|---------------|------|-------------|--------------|--------------|---------|
| 1      | 19.150        | VV   | 0.6211      | 1.21045e5    | 3353.40576   | 98.8826 |
| 2      | 22.022        | VV   | 0.6662      | 1367.77979   | 29.00519     | 1.1174  |

Totals : 1.22413e5 3382.41095

Results obtained with enhanced integrator!

4r

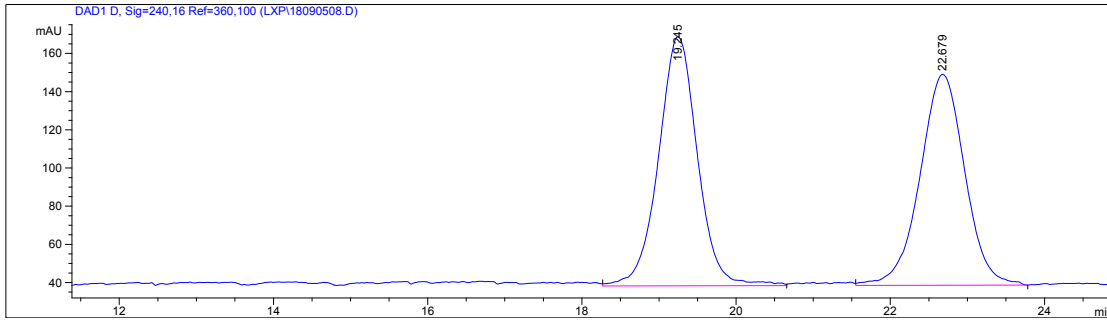

Signal 4: DAD1 D, Sig=240,16 Ref=360,100

| Peak # | RetTime [min] | Type | Width [min] | Area [mAU*s] | Height [mAU] | Area %  |
|--------|---------------|------|-------------|--------------|--------------|---------|
| 1      | 19.245        | VV   | 0.5384      | 4591.45605   | 130.53687    | 50.7190 |
| 2      | 22.679        | VP   | 0.6191      | 4461.27441   | 110.47253    | 49.2810 |

Totals : 9052.73047 241.00940

Results obtained with enhanced integrator!

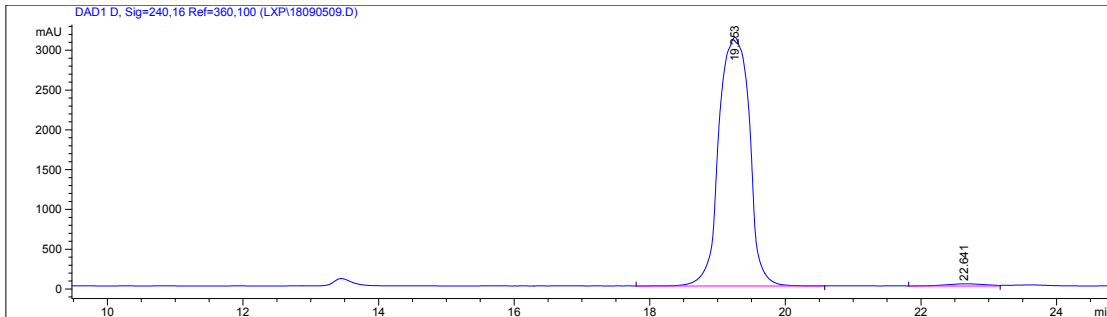

Signal 4: DAD1 D, Sig=240,16 Ref=360,100

| Peak # | RetTime [min] | Type | Width [min] | Area [mAU*s] | Height [mAU] | Area %  |
|--------|---------------|------|-------------|--------------|--------------|---------|
| 1      | 19.253        | VV   | 0.5248      | 9.76993e4    | 3124.35278   | 98.8646 |
| 2      | 22.641        | VV   | 0.6252      | 1121.99121   | 27.20411     | 1.1354  |

Totals : 9.88213e4 3151.55690

Results obtained with enhanced integrator!

4s

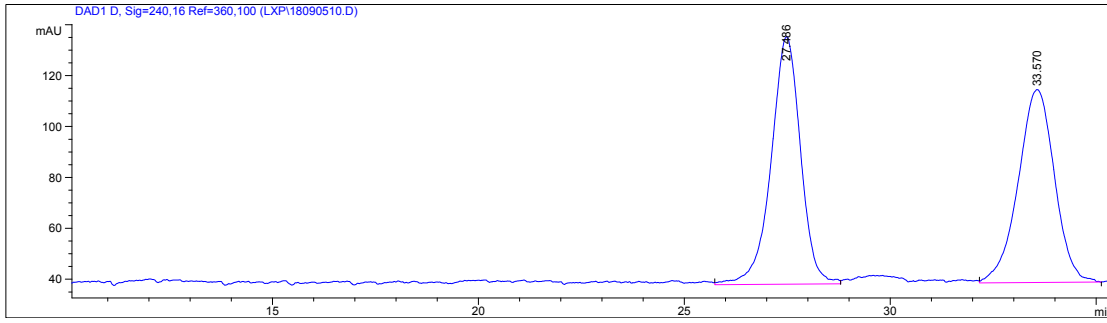

Signal 4: DAD1 D, Sig=240,16 Ref=360,100

| Peak # | RetTime [min] | Type | Width [min] | Area [mAU*s] | Height [mAU] | Area %  |
|--------|---------------|------|-------------|--------------|--------------|---------|
| 1      | 27.486        | VV   | 0.7495      | 4844.80615   | 97.20631     | 51.0472 |
| 2      | 33.570        | VP   | 0.9514      | 4646.02295   | 75.76279     | 48.9528 |

Totals : 9490.82910 172.96911

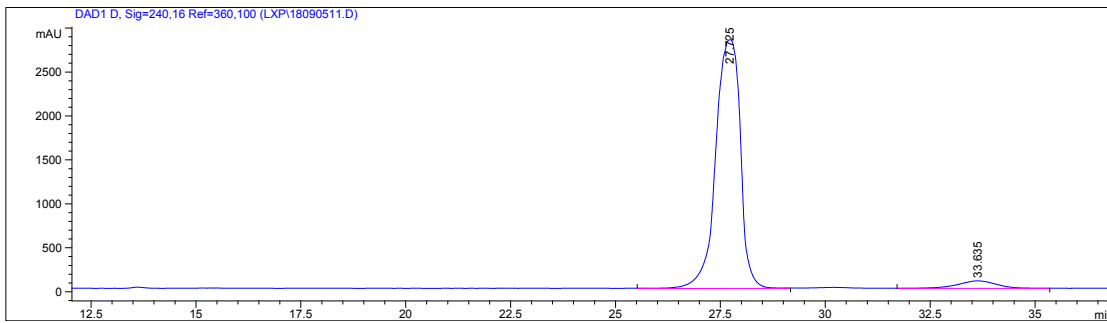

Signal 4: DAD1 D, Sig=240,16 Ref=360,100

| Peak # | RetTime [min] | Type | Width [min] | Area [mAU*s] | Height [mAU] | Area %  |
|--------|---------------|------|-------------|--------------|--------------|---------|
| 1      | 27.725        | VV   | 0.6525      | 1.15605e5    | 2830.39673   | 95.2864 |
| 2      | 33.635        | VV   | 0.9784      | 5718.66406   | 86.59795     | 4.7136  |

Totals : 1.21323e5 2916.99467

Results obtained with enhanced integrator!

4t

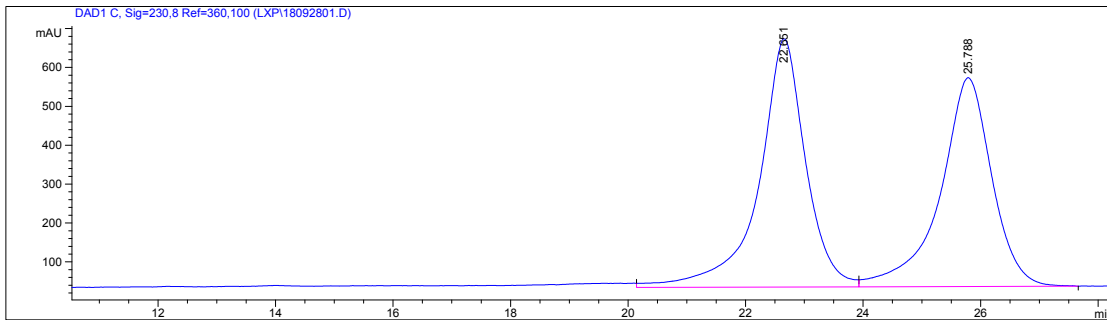

Signal 3: DAD1 C, Sig=230,8 Ref=360,100

| Peak # | RetTime [min] | Type | Width [min] | Area [mAU*s] | Height [mAU] | Area %  |
|--------|---------------|------|-------------|--------------|--------------|---------|
| 1      | 22.651        | VV   | 0.7808      | 3.53936e4    | 638.42169    | 51.8832 |
| 2      | 25.788        | VV   | 0.8907      | 3.28242e4    | 537.35980    | 48.1168 |

Totals : 6.82179e4 1175.78149

Results obtained with enhanced integrator!

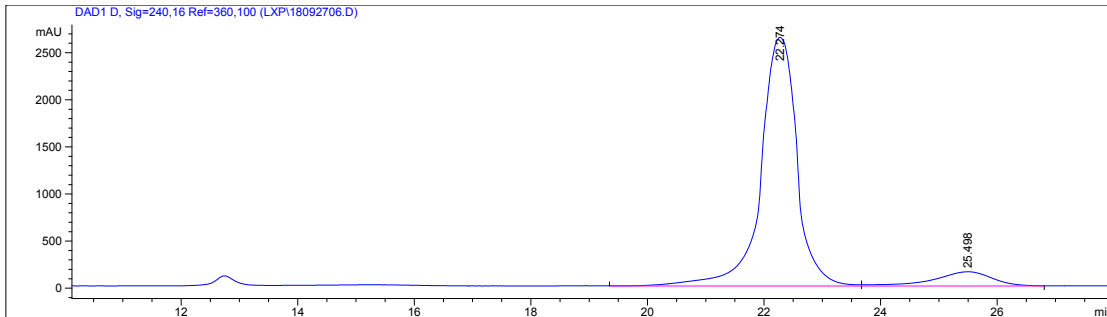

Signal 4: DAD1 D, Sig=240,16 Ref=360,100

| Peak # | RetTime [min] | Type | Width [min] | Area [mAU*s] | Height [mAU] | Area %  |
|--------|---------------|------|-------------|--------------|--------------|---------|
| 1      | 22.274        | VV   | 0.6903      | 1.13648e5    | 2639.62012   | 91.6391 |
| 2      | 25.488        | VV   | 1.0203      | 1.03689e4    | 150.40215    | 8.3609  |

Totals : 1.24017e5 2790.02226

Results obtained with enhanced integrator!

4u

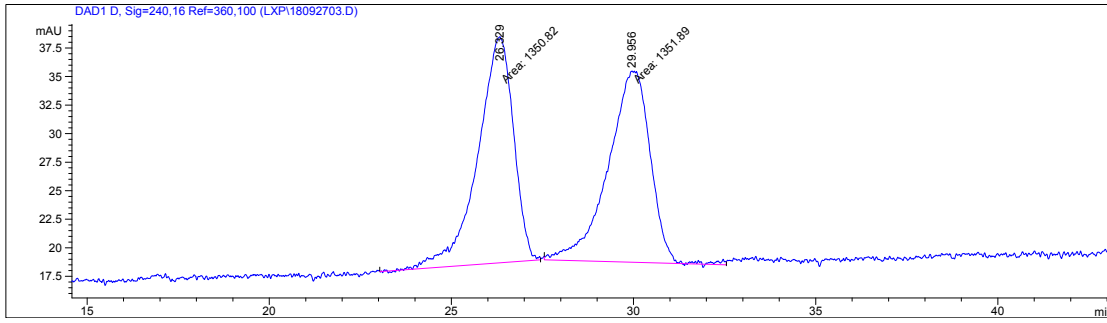

Signal 4: DAD1 D, Sig=240,16 Ref=360,100

| Peak # | RetTime [min] | Type | Width [min] | Area [mAU*s] | Height [mAU] | Area %  |
|--------|---------------|------|-------------|--------------|--------------|---------|
| 1      | 26.329        | MM   | 1.1371      | 1350.81702   | 19.79937     | 49.9801 |
| 2      | 29.956        | MM   | 1.3453      | 1351.89160   | 16.74867     | 50.0199 |

Totals : 2702.70862 36.54804

Results obtained with enhanced integrator!

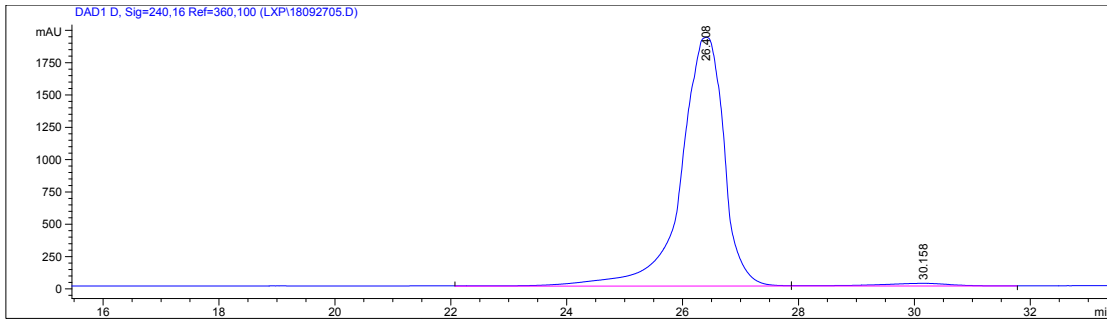

Signal 4: DAD1 D, Sig=240,16 Ref=360,100

| Peak # | RetTime [min] | Type | Width [min] | Area [mAU*s] | Height [mAU] | Area %  |
|--------|---------------|------|-------------|--------------|--------------|---------|
| 1      | 26.408        | VV   | 0.7098      | 9.92306e4    | 1923.82410   | 98.0575 |
| 2      | 30.158        | VV   | 1.1641      | 1965.76746   | 20.92301     | 1.9425  |

Totals : 1.01196e5 1944.74710

Results obtained with enhanced integrator!
